# Supplementary material for: Combination use of Beck Depression Inventory and two-question case-finding instrument as a screening tool for depression in the workplace
Source: PubMed Central journal article supplement — BMJ Open. 2012 May 7;2(3):e000596. doi: 10.1136/bmjopen-2011-000596 (PMC3353128; doi:10.1136/bmjopen-2011-000596), 2012-05-07

*Supplementary material*

## Combination Use of Beck Depression Inventory and Two- Question Case-Finding Instrument as a Screening Tool for Depression in the Workplace

Yasunori Adachi<sup>a</sup>, Branko Aleksic<sup>a, \*</sup>, Ryoko Nobata<sup>b</sup>, Tatsuyo Suzuki<sup>c</sup>, Keizo Yoshida<sup>d</sup>, Yuichiro Ono<sup>e</sup>, Norio Ozaki<sup>a</sup>

\*Corresponding author

<sup>a</sup>Department of Psychiatry, Graduate School of Medicine, Nagoya University, Nagoya, Japan

<sup>b</sup>Department of Psychiatry, Toyota Memorial Hospital, Toyota, Japan

<sup>c</sup>Department of Psychiatry, Seishinkai Okehazama Hospital, Toyoake, Japan

<sup>d</sup>Health Care Promotion Division, DENSO Corporation, Kariya, Japan

<sup>e</sup>Department of Public Health, Fujita Health University, Toyoake, Japan

Supplementary table 1.

Demographic data of participants

|        | Group1<br>(N=89) |      | Group 2<br>(N=1500) |      |
|--------|------------------|------|---------------------|------|
|        | N                | %    | N                   | %    |
| Sex    |                  |      |                     |      |
| Male   | 81               | 91.0 | 1408                | 93.9 |
| Female | 8                | 9.0  | 92                  | 6.1  |
| Age    |                  |      |                     |      |
| -19    | 0                | 0    | 0                   | 0    |
| 20-29  | 7                | 7.9  | 54                  | 3.6  |
| 30-39  | 44               | 49.4 | 655                 | 43.7 |
| 40-49  | 32               | 36.0 | 573                 | 38.2 |
| 50-59  | 6                | 6.7  | 213                 | 14.2 |
| 60-    | 0                | 0    | 5                   | 0.3  |

Supplementary figure 1.

Receiver Operation Characteristic curves for all possible cutoff scores of Beck Depression Inventory (BDI), two-question case-finding instrument (TQI), and all possible pairs of cutoff scores of BDI and TQI to identify workers who were diagnosed as having major depressive disorder. The points and corresponding lines in this figure are shifted to avoid overlapping by adding 0.03, 0.01, -0.01 and -0.03 to the sensitivity values of the groups of BDI + TQI = 2, BDI + TQI ≥ 1, BDI and TQI, respectively.

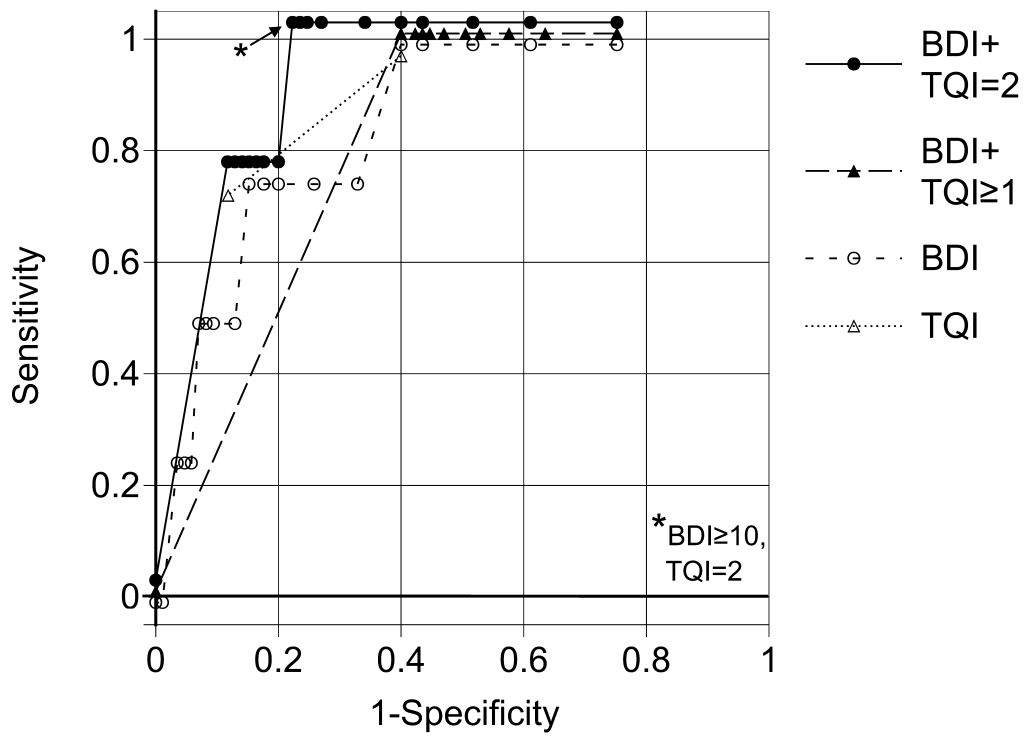

Supplementary figure 2.

Receiver Operation Characteristic curves for all possible cutoff scores of Beck Depression Inventory (BDI), two-question case-finding instrument (TQI), and all possible pairs of cutoff scores of BDI and TQI to identify both workers who were diagnosed as having major depressive disorder (MDD) and those who were not diagnosed as having MDD but having other psychiatric disorders frequently comorbid with MDD. The points and corresponding lines in this figure are shifted to avoid overlapping by adding 0.03, 0.01, -0.01 and -0.03 to the sensitivity values of the groups of  $BDI + TQI = 2$ ,  $BDI + TQI \geq 1$ , BDI and TQI, respectively.

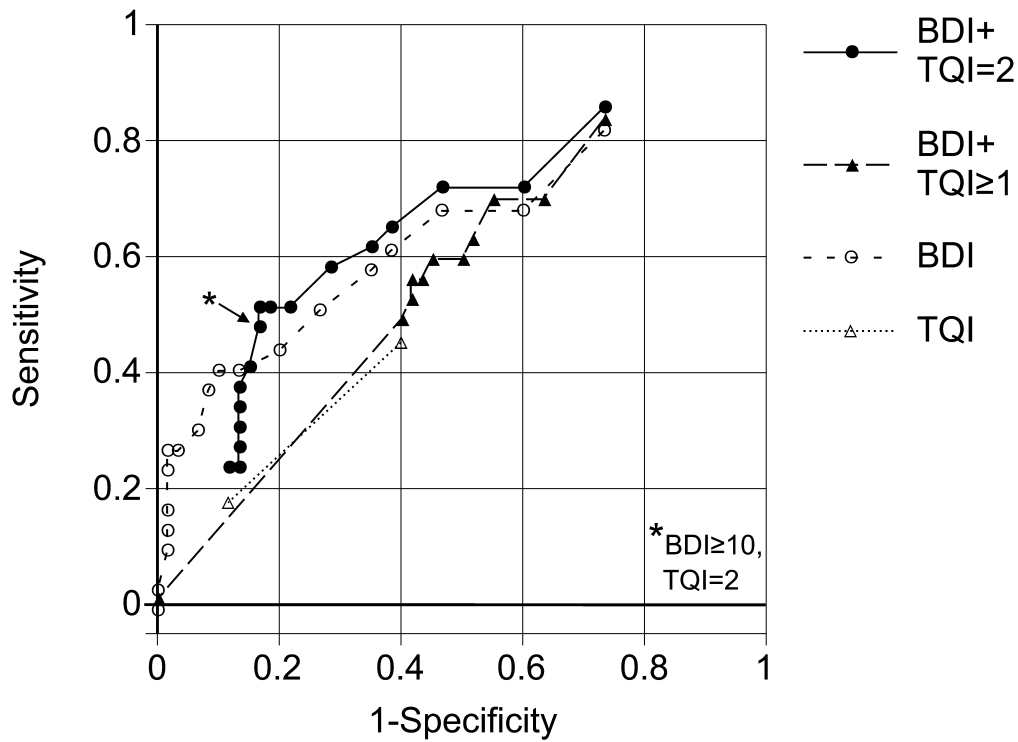

Supplementary figure 3.

Frequency distributions of Beck Depression Inventory in the male only sample

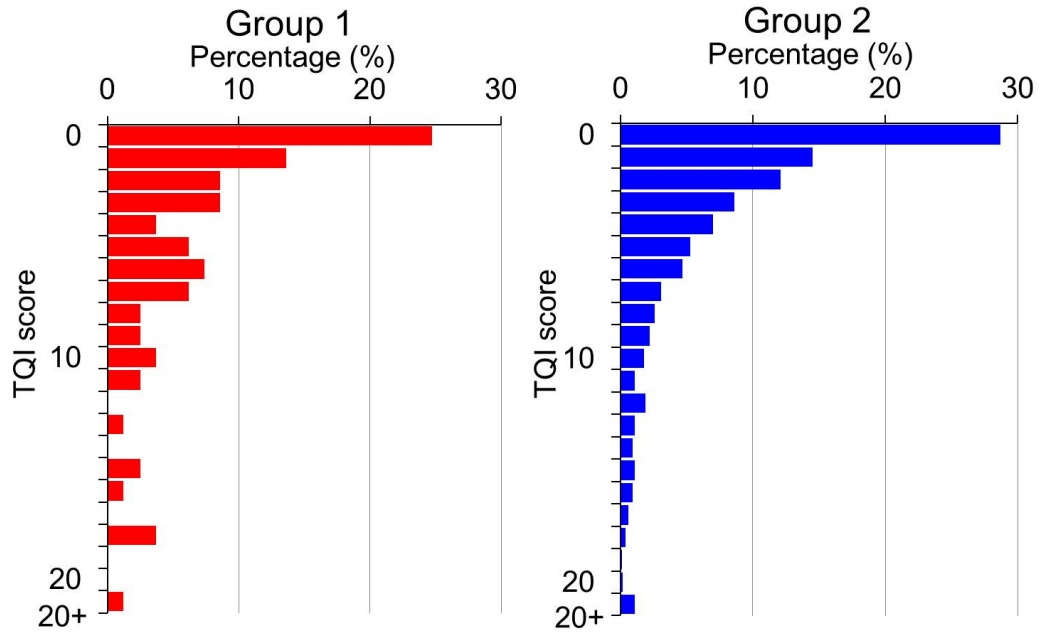

Supplementary table 2

Frequency distributions of two-question case-finding instrument in the male only sample

| Number of 'yes' answers | Group 1 |      | Group 2 |      |
|-------------------------|---------|------|---------|------|
|                         | N       | %    | N       | %    |
| 0                       | 47      | 58.0 | 1033    | 73.4 |
| 1                       | 23      | 28.4 | 213     | 15.1 |
| 2                       | 11      | 13.6 | 162     | 11.5 |

Supplementary table 3

The diagnoses of male participants in Group 1 according to Mini-International Neuropsychiatric Interview

| Diagnosis                                                             | N  | %    |
|-----------------------------------------------------------------------|----|------|
| No diagnosis                                                          | 54 | 66.7 |
| Substance use disorder                                                | 16 | 19.8 |
| Anxiety disorder                                                      | 5  | 6.2  |
| Major depressive disorder                                             | 2  | 2.5  |
| Bipolar disorder                                                      | 1  | 1.2  |
| Dysthymia                                                             | 1  | 1.2  |
| Bipolar disorder + Substance use disorder                             | 1  | 1.2  |
| Major depressive disorder + Substance use disorder + Anxiety disorder | 1  | 1.2  |

Supplementary table 4

The sensitivity, specificity, positive predictive value (PPV), and Youden Indices for all possible cutoff scores for Beck Depression Inventory (BDI), two-question case-finding instrument (TQI), and all possible pairs of cutoff scores of BDI and TQI to identify workers who were diagnosed with major depressive disorder in the male only sample.

|                               | Sensitivity | Specificity | PPV  | Youden Index |       |
|-------------------------------|-------------|-------------|------|--------------|-------|
| <b>BDI cutoff score</b>       |             |             |      |              |       |
| 4                             | 100         | 57.7        | 8.3  | 0.577        |       |
| 5                             | 100         | 61.5        | 9.1  | 0.615        |       |
| 6                             | 100         | 67.9        | 10.7 | 0.679        |       |
| 7                             | 100         | 75.6        | 13.6 | 0.756        |       |
| 8                             | 100         | 82.1        | 17.6 | 0.821        |       |
| 9                             | 100         | 84.6        | 20.0 | 0.846        |       |
| 10                            | 100         | 87.2        | 23.1 | 0.872        |       |
| 11                            | 66.7        | 89.7        | 20.0 | 0.564        |       |
| 12                            | 66.7        | 92.3        | 25.0 | 0.590        |       |
| 13                            | 66.7        | 92.3        | 25.0 | 0.590        |       |
| 14                            | 66.7        | 93.5        | 28.6 | 0.603        |       |
| 15                            | 66.7        | 93.5        | 28.6 | 0.603        |       |
| 16                            | 33.3        | 94.9        | 20.0 | 0.282        |       |
| 17                            | 33.3        | 96.2        | 25.0 | 0.295        |       |
| 18                            | 33.3        | 96.2        | 25.0 | 0.295        |       |
| <b>TQI cutoff score</b>       |             |             |      |              |       |
| 1                             | 100         | 60.3        | 8.8  | 0.603        |       |
| 2                             | 66.7        | 88.5        | 18.2 | 0.551        |       |
| <b>Pairs of cutoff scores</b> |             |             |      |              |       |
| <b>BDI</b>                    | <b>TQI</b>  |             |      |              |       |
| 4                             | 2           | 100         | 57.7 | 8.3          | 0.577 |
| 5                             | 2           | 100         | 61.5 | 9.1          | 0.615 |
| 6                             | 2           | 100         | 66.7 | 10.3         | 0.667 |
| 7                             | 2           | 100         | 74.4 | 13.0         | 0.744 |
| 8                             | 2           | 100         | 76.9 | 14.3         | 0.769 |
| 9                             | 2           | 100         | 78.2 | 15.0         | 0.782 |
| 10                            | 2           | 100         | 79.5 | 15.8         | 0.795 |
| 11                            | 2           | 66.7        | 82.1 | 12.5         | 0.487 |
| 12                            | 2           | 66.7        | 83.3 | 13.3         | 0.500 |
| 13                            | 2           | 66.7        | 83.3 | 13.3         | 0.500 |
| 14                            | 2           | 66.7        | 84.6 | 14.3         | 0.513 |
| 15                            | 2           | 66.7        | 84.6 | 14.3         | 0.513 |
| 16                            | 2           | 66.7        | 85.9 | 15.4         | 0.526 |
| 17                            | 2           | 66.7        | 87.2 | 16.7         | 0.538 |
| 18                            | 2           | 66.7        | 87.2 | 16.7         | 0.538 |
| 4                             | 1           | 100         | 47.4 | 6.8          | 0.474 |
| 5                             | 1           | 100         | 50.0 | 7.1          | 0.500 |
| 6                             | 1           | 100         | 53.8 | 7.7          | 0.538 |
| 7                             | 1           | 100         | 56.4 | 8.1          | 0.564 |
| 8                             | 1           | 100         | 57.7 | 8.3          | 0.577 |
| 9                             | 1           | 100         | 57.7 | 8.3          | 0.577 |



|    |   |     |      |     |       |
|----|---|-----|------|-----|-------|
| 10 | 1 | 100 | 59.0 | 8.6 | 0.590 |
| 11 | 1 | 100 | 59.0 | 8.6 | 0.590 |
| 12 | 1 | 100 | 60.3 | 8.8 | 0.603 |
| 13 | 1 | 100 | 60.3 | 8.8 | 0.603 |
| 14 | 1 | 100 | 60.3 | 8.8 | 0.603 |
| 15 | 1 | 100 | 60.3 | 8.8 | 0.603 |
| 16 | 1 | 100 | 60.3 | 8.8 | 0.603 |
| 17 | 1 | 100 | 60.3 | 8.8 | 0.603 |
| 18 | 1 | 100 | 60.3 | 8.8 | 0.603 |

---

Supplementary figure 4.

Receiver Operation Characteristic curves for all possible cutoff scores of Beck Depression Inventory (BDI), two-question case-finding instrument (TQI), and all possible pairs of cutoff scores of BDI and TQI to identify workers who were diagnosed as having major depressive disorder in the male only sample. The points and corresponding lines in this figure are shifted to avoid overlapping by adding 0.03, 0.01, -0.01 and -0.03 to the sensitivity values of the groups of BDI + TQI = 2, BDI + TQI  $\geq$  1, BDI and TQI, respectively.

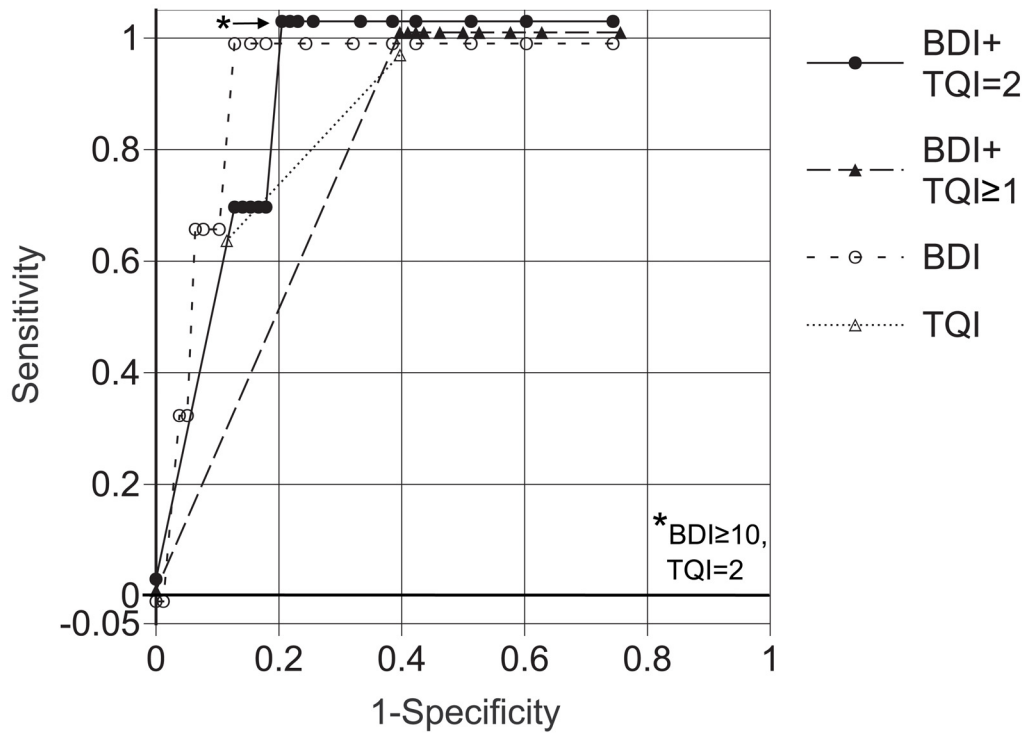

Supplementary table 5

The sensitivity, specificity, positive predictive value (PPV), and Youden Indices for all possible cutoff scores for Beck Depression Inventory (BDI), two-question case-finding instrument (TQI), and all possible pairs of cutoff scores BDI and TQI to identify both workers who were diagnosed as having major depressive disorder (MDD) and those who were not diagnosed as having MDD but had other psychiatric disorders frequently comorbid with MDD in the male only sample.

|                        | Sensitivity | Specificity | PPV  | Youden Index |       |
|------------------------|-------------|-------------|------|--------------|-------|
| BDI cutoff score       |             |             |      |              |       |
| 4                      | 59.3        | 63.0        | 44.4 | 0.222        |       |
| 5                      | 55.6        | 66.7        | 45.5 | 0.222        |       |
| 6                      | 51.9        | 74.1        | 50.0 | 0.259        |       |
| 7                      | 44.4        | 81.5        | 54.5 | 0.259        |       |
| 8                      | 40.7        | 88.9        | 64.7 | 0.296        |       |
| 9                      | 40.7        | 92.6        | 73.3 | 0.333        |       |
| 10                     | 37.0        | 94.4        | 76.9 | 0.315        |       |
| 11                     | 29.6        | 96.3        | 80.0 | 0.259        |       |
| 12                     | 25.9        | 98.1        | 87.5 | 0.259        |       |
| 13                     | 25.9        | 98.1        | 87.5 | 0.201        |       |
| 14                     | 22.2        | 98.1        | 85.7 | 0.201        |       |
| 15                     | 22.2        | 98.1        | 85.7 | 0.224        |       |
| 16                     | 14.8        | 98.1        | 80.0 | 0.130        |       |
| 17                     | 11.1        | 98.1        | 75.0 | 0.093        |       |
| 18                     | 11.1        | 98.1        | 75.0 | 0.093        |       |
| TQI cutoff score       |             |             |      |              |       |
| 1                      | 44.4        | 59.3        | 35.3 | 0.037        |       |
| 2                      | 18.5        | 88.9        | 45.5 | 0.074        |       |
| Pairs of cutoff scores |             |             |      |              |       |
| BDI                    | TQI         |             |      |              |       |
| 4                      | 2           | 59.3        | 63.0 | 44.4         | 0.222 |
| 5                      | 2           | 55.6        | 66.7 | 45.5         | 0.222 |
| 6                      | 2           | 51.9        | 72.2 | 48.3         | 0.241 |
| 7                      | 2           | 44.4        | 79.6 | 52.2         | 0.241 |
| 8                      | 2           | 44.4        | 83.3 | 57.1         | 0.278 |
| 9                      | 2           | 44.4        | 85.2 | 60.0         | 0.296 |
| 10                     | 2           | 44.8        | 85.2 | 57.9         | 0.259 |
| 11                     | 2           | 33.3        | 87.0 | 56.3         | 0.204 |
| 12                     | 2           | 29.6        | 87.0 | 53.3         | 0.167 |
| 13                     | 2           | 29.6        | 87.0 | 53.3         | 0.167 |
| 14                     | 2           | 25.9        | 87.0 | 50.0         | 0.130 |
| 15                     | 2           | 25.9        | 87.0 | 50.0         | 0.130 |
| 16                     | 2           | 22.2        | 87.0 | 46.2         | 0.093 |
| 17                     | 2           | 18.5        | 87.0 | 41.7         | 0.056 |
| 18                     | 2           | 18.5        | 87.0 | 41.7         | 0.056 |
| 4                      | 1           | 59.3        | 48.1 | 36.4         | 0.074 |
| 5                      | 1           | 55.6        | 50.0 | 35.7         | 0.056 |
| 6                      | 1           | 55.6        | 55.6 | 38.5         | 0.111 |

|    |   |      |      |      |       |
|----|---|------|------|------|-------|
| 7  | 1 | 51.9 | 57.4 | 37.8 | 0.093 |
| 8  | 1 | 51.9 | 59.3 | 38.9 | 0.111 |
| 9  | 1 | 51.9 | 59.3 | 38.9 | 0.111 |
| 10 | 1 | 48.1 | 59.3 | 37.1 | 0.074 |
| 11 | 1 | 48.1 | 59.3 | 37.1 | 0.074 |
| 12 | 1 | 44.4 | 59.3 | 35.2 | 0.037 |
| 13 | 1 | 44.4 | 59.3 | 35.2 | 0.037 |
| 14 | 1 | 44.4 | 59.3 | 35.2 | 0.037 |
| 15 | 1 | 44.4 | 59.3 | 35.2 | 0.037 |
| 16 | 1 | 44.4 | 59.3 | 35.2 | 0.037 |
| 17 | 1 | 44.4 | 59.3 | 35.2 | 0.037 |
| 18 | 1 | 44.4 | 59.3 | 35.2 | 0.037 |

---

Supplementary figure 5.

Receiver Operation Characteristic curves for all possible cutoff scores of Beck Depression Inventory (BDI), two-question case-finding instrument (TQI), and all possible pairs of cutoff scores of BDI and TQI to identify both workers who were diagnosed as having major depressive disorder (MDD) and those who were not diagnosed as having MDD but having other psychiatric disorders frequently comorbid with MDD in the male only sample. The points and corresponding lines in this figure are shifted to avoid overlapping by adding 0.03, 0.01, -0.01 and -0.03 to the sensitivity values of the groups of  $BDI + TQI = 2$ ,  $BDI + TQI \geq 1$ , BDI and TQI, respectively.

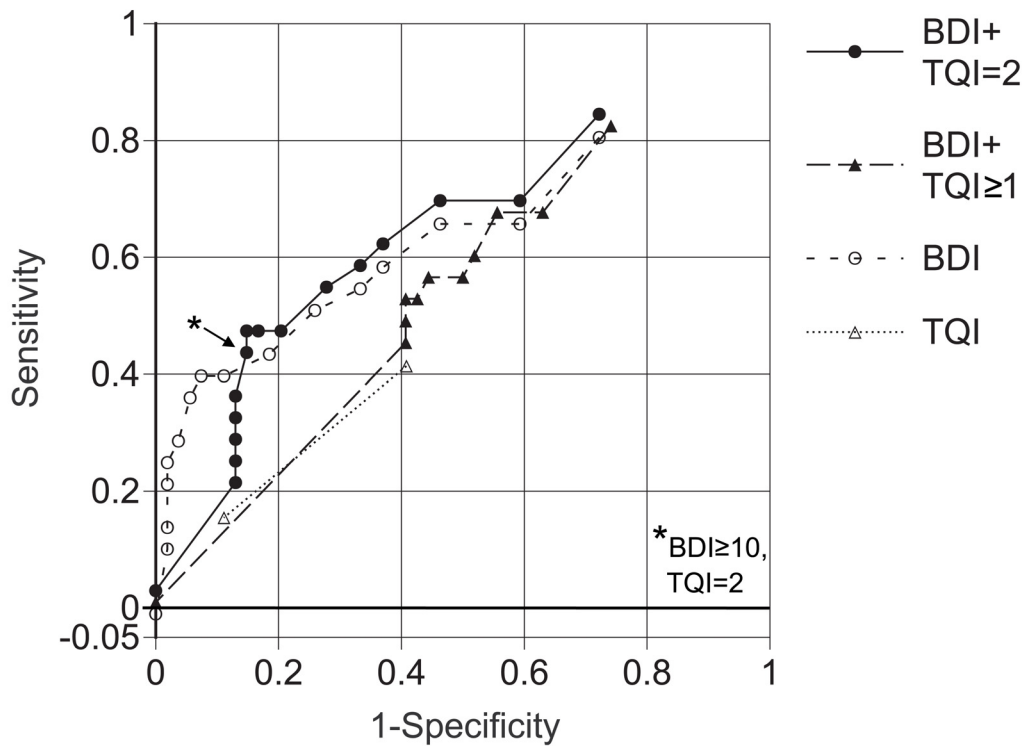

Supplement: bmjopen-2011-000596-s1.pdf [file bmjopen-2011-000596-s1.pdf]
