# Supplementary material for: Combination use of Beck Depression Inventory and two-question case-finding instrument as a screening tool for depression in the workplace
Source: PubMed Central journal article supplement — BMJ Open. 2012 May 7;2(3):e000596. doi: 10.1136/bmjopen-2011-000596 (PMC3353128; doi:10.1136/bmjopen-2011-000596), 2012-05-07

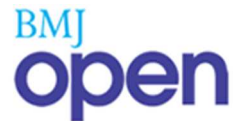

**Diagnostic test study: Combination Use of Beck Depression Inventory and Two-Question Case-Finding Instrument as a Screening Tool for Depression in the Workplace**

|                                 |                                                                                                                                                                                                                                                                                                                                                                                                                                                                                                                                                                                 |
|---------------------------------|---------------------------------------------------------------------------------------------------------------------------------------------------------------------------------------------------------------------------------------------------------------------------------------------------------------------------------------------------------------------------------------------------------------------------------------------------------------------------------------------------------------------------------------------------------------------------------|
| Journal:                        | <i>BMJ Open</i>                                                                                                                                                                                                                                                                                                                                                                                                                                                                                                                                                                 |
| Manuscript ID:                  | bmjopen-2011-000596                                                                                                                                                                                                                                                                                                                                                                                                                                                                                                                                                             |
| Article Type:                   | Research                                                                                                                                                                                                                                                                                                                                                                                                                                                                                                                                                                        |
| Date Submitted by the Author:   | 11-Nov-2011                                                                                                                                                                                                                                                                                                                                                                                                                                                                                                                                                                     |
| Complete List of Authors:       | Adachi, Yasunori; Nagoya University, Graduate School of Medicine, Department of Psychiatry<br>Aleksic, Branko; Nagoya University, Graduate School of Medicine, Department of Psychiatry<br>Nobata, Ryoko; Toyota Memorial Hospital, Department of Psychaitry<br>Suzuki, Tatsuyo; Seishinkai Okehazama Hospital, Department of Psychiatry<br>Yoshida, Keizo; DENSO Corporation, Health Care Promotion Division<br>Ono, Yuichiro; Fujita Health University, Department of Public Health<br>Ozaki, Norio; Nagoya University, Graduate School of Medicine, Department of Psychiatry |
| <b>Primary Subject Heading</b>: | Mental health                                                                                                                                                                                                                                                                                                                                                                                                                                                                                                                                                                   |
| Secondary Subject Heading:      | Occupational & environmental medicine                                                                                                                                                                                                                                                                                                                                                                                                                                                                                                                                           |
| Keywords:                       | Depression & mood disorders < PSYCHIATRY, Risk management < HEALTH SERVICES ADMINISTRATION & MANAGEMENT, MENTAL HEALTH                                                                                                                                                                                                                                                                                                                                                                                                                                                          |
|                                 |                                                                                                                                                                                                                                                                                                                                                                                                                                                                                                                                                                                 |

SCHOLARONE™  
Manuscripts

1  
2  
3  
4  
5 **Diagnostic test study: Combination Use of Beck Depression Inventory and**  
6  
7 **Two-Question Case-Finding Instrument as a Screening Tool for Depression in the**  
8  
9 **Workplace**  
10

11  
12  
13 Corresponding author:

14 Branko Aleksic; 65 Tsurumai-cho, Showa-ku, Nagoya 466-8560, Japan

15 E-mail: branko@med.nagoya-u.ac.jp

16  
17  
18  
19  
20  
21  
22  
23  
24  
25  
26  
27  
28  
29  
30  
31  
32  
33  
34  
35  
36  
37  
38  
39  
40  
41  
42  
43  
44  
45  
46  
47  
48  
49  
50  
51  
52  
53  
54  
55  
56  
57  
58  
59  
60  
Tel: +81-52-744-2282; Fax: +81-52-744-2293

Author:

25 Yasunori Adachi; Department of Psychiatry, Graduate School of Medicine, Nagoya University,  
26  
27  
28  
29  
30  
31  
32  
33  
34  
35  
36  
37  
38  
39  
40  
41  
42  
43  
44  
45  
46  
47  
48  
49  
50  
51  
52  
53  
54  
55  
56  
57  
58  
59  
60  
Nagoya, Japan

Co-authors:

33 Branko Aleksic; Department of Psychiatry, Graduate School of Medicine, Nagoya University,  
34  
35  
36  
37  
38  
39  
40  
41  
42  
43  
44  
45  
46  
47  
48  
49  
50  
51  
52  
53  
54  
55  
56  
57  
58  
59  
60  
Nagoya, Japan

Ryoko Nobata; Department of Psychiatry, Toyota Memorial Hospital, Toyota, Japan

Tatsuyo Suzuki; Department of Psychiatry, Seishinkai Okehazama Hospital, Toyoake, Japan

Keizo Yoshida; Health Care Promotion Division, DENSO Corporation, Kariya, Japan

Yuichiro Ono; Department of Public Health, Fujita Health University, Toyoake, Japan

46 Norio Ozaki; Department of Psychiatry, Graduate School of Medicine, Nagoya University,  
47  
48  
49  
50  
51  
52  
53  
54  
55  
56  
57  
58  
59  
60  
Nagoya, Japan

52 Keywords; depression, screening, workplace, Beck Depression Inventory, Two-question  
53  
54  
55  
56  
57  
58  
59  
60  
case-finding instrument

Word count; 2697 words

## ABSTRACT

**Objectives:** The present study aimed to validate screening tools that could be used to identify depression among workers.

**Design:** Diagnostic test study.

**Settings:** Workers from three Japanese companies agreed to participate.

**Participants:** Recruitment for the group 1 occurred between January 2001 and February 2004, and it included 90 workers in a company who agreed to participate. One participant did not complete the questionnaires; 89 (98.8%) took part in the study. Recruitment for the group 2 occurred between July 2000 and February 2004 and 1591 workers from three companies agreed to participate. Ninety-one participants did not complete the questionnaire; 1500 (94.2%) took part in the study. Demographic data are shown in Supplementary table 1.

**Interventions:** -

**Primary and secondary outcome measures:** The Beck Depression Inventory (BDI) and a two-question case-finding instrument (TQI) were administered to 89 workers and Mini-International Neuropsychiatric Interview was conducted to verify the diagnosis of depression. A second group of 1500 workers completed the BDI and TQI to detect possible sample bias for the distribution of depression. Specificity, sensitivity and PPV were calculated in order to obtain the optimal cutoff scores for BDI and TQI and receiver operating characteristic curves (ROC) and Youden index were applied to further refine the optimal cutoff scores.

**Results:** When paired together, BDI score  $\geq 10$  and TQI score of 2 adequately identified workers who had major depressive disorder (MDD) and those who had other psychiatric disorders that are frequently comorbid with MDD.

**Conclusions:** The combination of BDI score  $\geq 10$  and TQI score of 2 can adequately screen for current and potential cases of depression among workers. Furthermore, BDI and TQI offer

1  
2  
3  
4  
5  
6  
7  
8  
9  
10  
11  
12  
13  
14  
15  
16  
17  
18  
19  
20  
21  
22  
23  
24  
25  
26  
27  
28  
29  
30  
31  
32  
33  
34  
35  
36  
37  
38  
39  
40  
41  
42  
43  
44  
45  
46  
47  
48  
49  
50  
51  
52  
53  
54  
55  
56  
57  
58  
59  
60

the advantage of being relatively easy to administer to a large number of workers. Early detection of depression could improve treatment outcomes and decrease economic burden.

**Trail registration:-**

For peer review only

## ARTICLE SUMMARY

### Article focus

- Even though the magnitude of productivity loss from depression is substantial, a large number of depressed workers are untreated or inadequately treated.
- The aim of the present study was to establish an efficient way to identify workers who were diagnosed as having MDD (= workers with depression) and those who were not diagnosed as having MDD but had other psychiatric disorders that are frequently comorbid with MDD (= workers with comorbid disorders)

### Key messages

- We conclude that combined application of Beck Depression Inventory (BDI) and a two-question case-finding instrument (TQI) is an efficient way to identify not only workers who are depressed but also those who are likely to be depressed in the workplace.
- Although further investigations using larger samples are needed, the BDI and TQI combination is a useful screening tool, especially for big companies that have many employees.

### Strengths and limitations of this study

- Our study use relatively large sample for evaluation of the receiver operating characteristic (ROC) curves and Youden Indices in order to calculate the optimal cutoff point for depression in the workplace. Furthermore better sensitivity and specificity was achieved by an additional use of TQI.
- The limitation of our study is that effects of socio-economical and clinical factors which are considered to be associated with depression (e.g., alcohol intake) were not included in the analysis.

## INTRODUCTION

Depression is a highly prevalent disorder that is associated with enormous economic costs. Major depressive disorder (MDD) was estimated to affect 18.1 million people living in United States in 2000, and to have lifetime prevalence of 16.2% and an annual prevalence of 6.6%. [1, 2] The total economic burden (both direct and indirect costs) of depression was estimated to be more than 83 billion U.S. dollars and 118 billion euros in the United States and Europe, respectively. [1, 3] In Japan, MDD was estimated to have an annual prevalence of 2.2% and 7.0% of white collar workers were reported to meet the Diagnostic and Statistical Manual of Mental Disorders, Fourth Edition (DSM-IV) criteria for major depressive episode and score more than 40 points (depressive range) on the self-rating depression scale (SDS). [4, 5] The annual societal cost of depression and suicide was estimated at 2.7 trillion yen. [6] Based on the epidemiological trends, depression will become the second-leading cause of global disease burden by 2020, [7] and is expected to rank first in disease burden in high-income countries by the 2030. [8]

The economic burden of depression is attributed to functional impairment of employees due to physical and cognitive symptoms. Moreover, the prevalence of depression is highest in the age group of 15-64 years, which corresponds to the typical working age. [9] Indeed, it was reported that depressed workers in the United States have 1.5-3.2 times more short-term work-disability days per month than people who were not depressed. [10]

Furthermore, the European ESEMeD study revealed that depressed workers had 3-4 times more work-loss days per month compared to workers without depression. [11] In addition to the cost of depression-related absenteeism, presenteeism, the state in which depressed workers stay at work but have reduced productivity as a result of their condition, needs to be considered. Almost half of people with chronic depression reported reduced productivity at work and the costs of productivity loss associated with MDD in the United States (in 2002)

1  
2  
3  
4  
5 have been estimated at over 31 billion U.S. dollars.[12, 13] Kessler et al. showed that MDD was  
6  
7 associated with 8.7 days of absenteeism and 18.2 days of lost productivity per year at a cost of  
8  
9 4,426 U.S. dollars per person annually, and when these data were inflated to the entire adult  
10  
11 population of the United States, productivity losses were estimated at 36.6 billion U.S.  
12  
13 dollars.[14, 15]

14  
15 Even though the magnitude of productivity loss from depression is substantial, a large  
16  
17 number of depressed workers are untreated or inadequately treated.[2, 16, 17] The increasing  
18  
19 duration of untreated illness (DUI) may be associated with worse treatment outcomes of  
20  
21 depression.[18] Many studies have reported that DUI is a predictive factor for treatment  
22  
23 outcome.[19-21] In addition, early treatment of the first depressive episode is important because  
24  
25 our previous study showed that a shorter DUI implied better remission outcomes in patients  
26  
27 with the first MDD.[22] Therefore, early identification of depressed workers is crucial in order  
28  
29 to improve treatment outcomes and reduce cost.[2, 16] Moreover, since it is difficult to  
30  
31 interview and evaluate all employees, an efficient screening tool for depression among workers  
32  
33 is needed.  
34

35  
36 The aim of the present study was to establish an efficient way to identify workers who  
37  
38 were diagnosed as having MDD (= workers with depression) and those who were not diagnosed  
39  
40 as having MDD but had other psychiatric disorders that are frequently comorbid with MDD (=  
41  
42 workers with comorbid disorders). We identified workers with depression using  
43  
44 Mini-International Neuropsychiatric Interview (M.I.N.I.) and investigated an optimal pair of  
45  
46 cutoff scores using a combination of Beck Depression Inventory (BDI) and a two-question  
47  
48 case-finding instrument (TQI) for depression screening. Afterwards, we examined the  
49  
50 specificity and sensitivity of the screening procedure for identification of both workers with  
51  
52 depression and those with comorbid disorders. The current study is a continuation of the  
53  
54 preliminary research conducted in 2003.[23] In addition to the larger sample size used in the  
55  
56 current study, we evaluated the receiver operating characteristic (ROC) curves and Youden  
57  
58  
59  
60

1  
2  
3  
4  
5  
6  
7  
8  
9  
10  
11  
12  
13  
14  
15  
16  
17  
18  
19  
20  
21  
22  
23  
24  
25  
26  
27  
28  
29  
30  
31  
32  
33  
34  
35  
36  
37  
38  
39  
40  
41  
42  
43  
44  
45  
46  
47  
48  
49  
50  
51  
52  
53  
54  
55  
56  
57  
58  
59  
60

Indices in order to calculate the optimal cutoff point for depression in the workplace.

For peer review only



## MATERIALS AND METHODS

### Participants

We selected two groups of participants. Group 1 was established in order to investigate the optimal pair of cutoff scores of BDI and TQI for screening of depression. Participants in Group 1 answered both BDI and TQI and their diagnosis was confirmed using the M.I.N.I. The M.I.N.I. Japanese version was used as a diagnostic standard for identifying cases. Recruitment occurred between January 2001 and February 2004, and it included 90 workers in a company who agreed to participate. One (1.1%) participant did not complete the questionnaires; 89 (98.8%) took part in the study.

Group 2 was established in order to investigate the sampling bias in the distribution of depression severity among Group 1, which was a relatively small sample size. In Group 2, a large number of subjects were necessary; therefore, only BDI and TQI were performed and the M.I.N.I. assessment was omitted. Recruitment occurred between July 2000 and February 2004 and 1591 workers from three companies agreed to participate. Ninety-one (5.7%) participants did not complete the questionnaire; 1500 (94.2%) took part in the study. Demographic data of participants in each group are shown in Supplementary table 1.

### Measurements

#### Beck Depression Inventory (BDI)

The BDI, developed by Beck et al., is one of the most widely used self-rating questionnaires for measuring the severity of depression.[24] The BDI-I is a 21-item scale (range 0-60). We used the Japanese version of BDI-I, which has been validated and is widely used in

1  
2  
3  
4  
5 Japan.[25]  
6  
7  
8

9 Two-question case-finding instrument (TQI)  
10

11  
12  
13 A two-question depression-screening tool developed by Whooley et al. was extracted  
14 from the Primary Care Evaluation of Mental Disorders (PRIME-MD) questionnaire.[26, 27] It  
15 includes two questions about depressed mood and anhedonia: (1) “During the past month, have  
16 you often been bothered by feeling down, depressed, or hopeless?” and (2) “During the past  
17 month, have you often been bothered by little interest or pleasure in doing things?” The TQI  
18 operates in the range of many other validated depression-screening tools, and it eases the burden  
19 of administration by being succinct. For the two-question instrument, a “yes” answer to either of  
20 the two questions was considered to indicate a positive result.  
21  
22  
23  
24  
25  
26  
27  
28

29  
30 After obtaining consent from the author of the original work, the original TQI was  
31 carefully translated into Japanese. The semantic fidelity of the Japanese version of TQI was  
32 ascertained by means of back translation, whereby the first Japanese version was translated back  
33 into English by an independent researcher blind to the original English version, and any  
34 discrepancies between the original and the re-translations were corrected until the two were  
35 semantically equivalent.  
36  
37  
38  
39  
40  
41  
42  
43

44 Criterion Standard  
45  
46  
47

48 The M.I.N.I. is a short structured diagnostic interview, developed jointly by  
49 psychiatrists and clinicians in the United States and Europe, for DSM-IV and International  
50 Classification of Diseases, Tenth Edition (ICD-10) psychiatric disorders.[28] With an  
51 administration time of approximately 15 minutes, M.I.N.I. was designed to meet the need for a  
52 short but accurate structured psychiatric interview for multicenter clinical trials and  
53  
54  
55  
56  
57  
58  
59  
60

1  
2  
3  
4  
5 epidemiology studies and to be used as a first step in outcome tracking in non-research clinical  
6  
7 settings. Trained psychiatrists and clinical psychologists performed the Japanese version of  
8  
9 M.I.N.I. structured interview, and the results were used to validate the optimal pair of cutoff  
10  
11 scores of BDI and TQI.  
12

### 13 14 15 **Study Design and Procedure** 16

17  
18  
19 In Group 1, participants were assessed by BDI and TQI and then they were  
20  
21 additionally diagnosed using the M.I.N.I. In Group 2, only BDI and TQI assessments were  
22  
23 performed. Subsequently, we investigated the frequency distributions of BDI and TQI in two  
24  
25 groups and compared them to confirm that there were no significant differences between the  
26  
27 two experimental groups. After confirming that Group 1 was not a biased sample, we explored  
28  
29 the optimal pair of cutoff scores of BDI and TQI for identifying workers with depression.  
30

31  
32 The frequency distributions of BDI and TQI were compared using Mann-Whitney U  
33  
34 test ( $p < 0.05$ ) to examine whether there were statistical significant differences between the two  
35  
36 groups. The sensitivity (Se), specificity (Sp), and positive predictive value (PPV) were  
37  
38 calculated for all possible cutoff scores for BDI, TQI, and all possible pairs of cutoff scores of  
39  
40 BDI and TQI to identify workers with depression in Group 1. Sensitivity refers to the proportion  
41  
42 of correctly identified cases and specificity to the proportion of correctly identified non-cases.  
43  
44 PPV is the probability that depressed workers identified using the optimal cutoff score are cases  
45  
46 according to the M.I.N.I.  
47

48  
49 To determine the optimal cutoff point, the receiver operating characteristic (ROC)  
50  
51 curve was created for all possible cutoff scores of BDI, TQI, and all possible pairs of cutoff  
52  
53 scores of BDI and TQI. The Youden Indices were calculated, concurrently. The ROC curve is a  
54  
55 popular graphical method of displaying the discriminatory accuracy of a diagnostic test for  
56  
57 distinguishing between two populations. The ROC curve is a plot of Se and  $1 - Sp$  for all  
58  
59  
60

1  
2  
3  
4  
5 possible cutoff scores of the test. To evaluate the discriminatory ability of a diagnostic test, it is  
6  
7 common to summarize the information of the ROC curve into a single global value or  
8  
9 index.[29] The Youden Index is the easiest to apply and frequently used in practice. This index  
10  
11 can be defined as  $\{Se + Sp - 1\}$  and provides a criterion for the “optimal” threshold value; the  
12  
13 threshold value for which  $Se + Sp - 1$  is maximized.[30]  
14

15  
16 Furthermore, we applied the screening thresholds to identify workers with comorbid  
17  
18 disorders in additions to those with depression. The Se, Sp, and PPV were calculated for all  
19  
20 possible cutoff scores for BDI, TQI, and all possible pairs of cutoff scores of BDI and TQI to  
21  
22 identify both workers with depression and those with comorbid disorders. Subsequently, the  
23  
24 ROC curve was created and the Youden Indices were calculated.  
25  
26  
27  
28  
29  
30  
31  
32  
33  
34  
35  
36  
37  
38  
39  
40  
41  
42  
43  
44  
45  
46  
47  
48  
49  
50  
51  
52  
53  
54  
55  
56  
57  
58  
59  
60

## RESULTS

The frequency distributions of BDI and TQI in each group are presented in Table 1 and 2, respectively. Mann-Whitney U test revealed that there was no significant difference in the frequency distribution of BDI between the two groups. However, significant difference was found in the frequency distributions of TQI between two groups ( $p = .003$ ). The diagnoses of the participants in Group 1 based on M.I.N.I. are listed in Table 3.

Table 1  
Frequency distributions of Beck Depression Inventory

| Score | Group 1 |      | Group 2 |      |
|-------|---------|------|---------|------|
|       | N       | %    | N       | %    |
| 0     | 22      | 24.7 | 428     | 28.5 |
| 1     | 11      | 12.4 | 213     | 14.2 |
| 2     | 8       | 9.0  | 181     | 12.1 |
| 3     | 7       | 7.9  | 131     | 8.7  |
| 4     | 3       | 3.4  | 104     | 6.9  |
| 5     | 7       | 7.9  | 83      | 5.5  |
| 6     | 6       | 6.7  | 72      | 4.8  |
| 7     | 5       | 5.6  | 47      | 3.1  |
| 8     | 2       | 2.2  | 39      | 2.6  |
| 9     | 2       | 2.2  | 34      | 2.3  |
| 10    | 3       | 3.4  | 27      | 1.8  |
| 11    | 3       | 3.4  | 17      | 1.1  |
| 12    | 1       | 1.1  | 27      | 1.8  |
| 13    | 1       | 1.1  | 16      | 1.1  |
| 14    | 0       | 0    | 13      | 0.9  |
| 15    | 2       | 2.2  | 16      | 1.1  |

|    |    |   |     |    |     |
|----|----|---|-----|----|-----|
| 1  |    |   |     |    |     |
| 2  |    |   |     |    |     |
| 3  |    |   |     |    |     |
| 4  |    |   |     |    |     |
| 5  |    |   |     |    |     |
| 6  | 16 | 1 | 1.1 | 13 | 0.9 |
| 7  | 17 | 1 | 1.1 | 10 | 0.7 |
| 8  | 18 | 3 | 3.4 | 6  | 0.4 |
| 9  | 19 | 0 | 0   | 2  | 0.1 |
| 10 | 20 | 0 | 0   | 4  | 0.3 |
| 11 | 21 | 0 | 0   | 1  | 0.1 |
| 12 | 22 | 0 | 0   | 2  | 0.1 |
| 13 | 23 | 1 | 1.1 | 2  | 0.1 |
| 14 | 24 | 0 | 0   | 0  | 0   |
| 15 | 25 | 0 | 0   | 1  | 0.1 |
| 16 | 26 | 0 | 0   | 3  | 0.2 |
| 17 | 27 | 0 | 0   | 1  | 0.1 |
| 18 | 28 | 0 | 0   | 1  | 0.1 |
| 19 | 29 | 0 | 0   | 1  | 0.1 |
| 20 | 30 | 0 | 0   | 0  | 0   |
| 21 | 31 | 0 | 0   | 1  | 0.1 |
| 22 | 32 | 0 | 0   | 0  | 0   |
| 23 | 33 | 0 | 0   | 0  | 0   |
| 24 | 34 | 0 | 0   | 0  | 0   |
| 25 | 35 | 0 | 0   | 0  | 0   |
| 26 | 36 | 0 | 0   | 2  | 0.1 |
| 27 | 37 | 0 | 0   | 0  | 0   |
| 28 | 38 | 0 | 0   | 0  | 0   |
| 29 | 39 | 0 | 0   | 0  | 0   |
| 30 | 40 | 0 | 0   | 1  | 0.1 |
| 31 | 41 | 0 | 0   | 0  | 0   |
| 32 | 42 | 0 | 0   | 1  | 0.1 |
| 33 |    |   |     |    |     |
| 34 |    |   |     |    |     |
| 35 |    |   |     |    |     |
| 36 |    |   |     |    |     |
| 37 |    |   |     |    |     |
| 38 |    |   |     |    |     |
| 39 |    |   |     |    |     |
| 40 |    |   |     |    |     |
| 41 |    |   |     |    |     |
| 42 |    |   |     |    |     |
| 43 |    |   |     |    |     |
| 44 |    |   |     |    |     |
| 45 |    |   |     |    |     |
| 46 |    |   |     |    |     |
| 47 |    |   |     |    |     |
| 48 |    |   |     |    |     |
| 49 |    |   |     |    |     |
| 50 |    |   |     |    |     |
| 51 |    |   |     |    |     |
| 52 |    |   |     |    |     |
| 53 |    |   |     |    |     |
| 54 |    |   |     |    |     |
| 55 |    |   |     |    |     |
| 56 |    |   |     |    |     |
| 57 |    |   |     |    |     |
| 58 |    |   |     |    |     |
| 59 |    |   |     |    |     |
| 60 |    |   |     |    |     |

Table 2

Frequency distributions of two-question case-finding instrument

| Number of 'yes' answers | Group 1 |      | Group 2 |      |
|-------------------------|---------|------|---------|------|
|                         | N       | %    | N       | %    |
| 0                       | 51      | 57.3 | 1097    | 73.1 |
| 1                       | 25      | 28.1 | 229     | 15.3 |
| 2                       | 13      | 14.6 | 174     | 11.6 |

For peer review only

Table 3

The diagnoses of participants in Group 1 according to Mini-International Neuropsychiatric Interview

| Diagnosis                                                             | N  | %    |
|-----------------------------------------------------------------------|----|------|
| No diagnosis                                                          | 60 | 67.4 |
| Substance use disorder                                                | 16 | 17.9 |
| Anxiety disorder                                                      | 6  | 6.7  |
| Major depressive disorder                                             | 3  | 3.3  |
| Bipolar disorder                                                      | 1  | 1.1  |
| Dysthymia                                                             | 1  | 1.1  |
| Bipolar disorder + Substance use disorder                             | 1  | 1.1  |
| Major depressive disorder + Substance use disorder + Anxiety disorder | 1  | 1.1  |

The sensitivity, specificity, and PPV for all possible cutoff scores of BDI, TQI, and all possible pairs of cutoff scores of BDI and TQI to identify workers with depression are listed in Table 4. The ROC curves are showed in Supplementary figure 1 and the Youden Indices are listed in Table 4. The maximum value of the Youden Index was derived from neither BDI nor TQI alone but the combination of the BDI and TQI: 0.776 at the point of BDI score  $\geq 10$  and TQI score = 2. The pair of scores of BDI  $\geq 10$  and TQI = 2 was considered to be optimal to identify workers with depression; both those whose BDI score was  $\geq 10$  and those whose TQI score was = 2 were defined as “cases”.



Table 4

The sensitivity, specificity, positive predictive value (PPV), and Youden Indices for all possible cutoff scores for Beck Depression Inventory (BDI), two-question case-finding instrument (TQI), and all possible pairs of cutoff scores of BDI and TQI to identify workers who were diagnosed with major depressive disorder.

|                               | Sensitivity | Specificity | PPV  | Youden Index |       |
|-------------------------------|-------------|-------------|------|--------------|-------|
| <b>BDI cutoff score</b>       |             |             |      |              |       |
| 4                             | 100         | 56.4        | 9.7  | 0.564        |       |
| 5                             | 100         | 60.0        | 10.5 | 0.600        |       |
| 6                             | 75.0        | 67.0        | 9.6  | 0.420        |       |
| 7                             | 75.0        | 74.1        | 12.0 | 0.491        |       |
| 8                             | 75.0        | 80.0        | 15.0 | 0.550        |       |
| 9                             | 75.0        | 82.3        | 16.6 | 0.573        |       |
| 10                            | 75.0        | 84.7        | 18.7 | 0.597        |       |
| 11                            | 50.0        | 87.0        | 15.3 | 0.370        |       |
| 12                            | 50.0        | 90.5        | 20.0 | 0.405        |       |
| 13                            | 50.0        | 91.7        | 22.2 | 0.417        |       |
| 14                            | 50.0        | 92.9        | 25.0 | 0.429        |       |
| 15                            | 50.0        | 92.9        | 25.0 | 0.429        |       |
| 16                            | 25.0        | 94.1        | 16.6 | 0.191        |       |
| 17                            | 25.0        | 95.2        | 20.0 | 0.202        |       |
| 18                            | 0           | 98.8        | 25.0 | 0.214        |       |
| <b>TQI cutoff score</b>       |             |             |      |              |       |
| 1                             | 100         | 60.0        | 10.5 | 0.600        |       |
| 2                             | 75.0        | 88.2        | 23.0 | 0.632        |       |
| <b>Pairs of cutoff scores</b> |             |             |      |              |       |
| BDI                           | TQI         |             |      |              |       |
| 4                             | 2           | 100         | 56.4 | 9.7          | 0.564 |
| 5                             | 2           | 100         | 60.0 | 10.5         | 0.600 |
| 6                             | 2           | 100         | 65.8 | 12.1         | 0.658 |
| 7                             | 2           | 100         | 72.9 | 14.8         | 0.729 |

1  
2  
3  
4  
5  
6  
7  
8  
9  
10  
11  
12  
13  
14  
15  
16  
17  
18  
19  
20  
21  
22  
23  
24  
25  
26  
27  
28  
29  
30  
31  
32  
33  
34  
35  
36  
37  
38  
39  
40  
41  
42  
43  
44  
45  
46  
47  
48  
49  
50  
51  
52  
53  
54  
55  
56  
57  
58  
59  
60

|    |   |      |      |      |       |
|----|---|------|------|------|-------|
| 8  | 2 | 100  | 75.2 | 16.0 | 0.752 |
| 9  | 2 | 100  | 76.4 | 16.6 | 0.764 |
| 10 | 2 | 100  | 77.6 | 17.3 | 0.776 |
| 11 | 2 | 75.0 | 80.0 | 15.0 | 0.550 |
| 12 | 2 | 75.0 | 82.3 | 16.6 | 0.573 |
| 13 | 2 | 75.0 | 82.3 | 16.6 | 0.573 |
| 14 | 2 | 75.0 | 83.5 | 17.6 | 0.585 |
| 15 | 2 | 75.0 | 83.5 | 17.6 | 0.585 |
| 16 | 2 | 75.0 | 84.7 | 18.7 | 0.597 |
| 17 | 2 | 75.0 | 85.8 | 20.0 | 0.608 |
| 18 | 2 | 75.0 | 87.0 | 21.4 | 0.620 |
| 4  | 1 | 100  | 47.0 | 8.1  | 0.470 |
| 5  | 1 | 100  | 49.4 | 8.5  | 0.491 |
| 6  | 1 | 100  | 52.9 | 9.0  | 0.529 |
| 7  | 1 | 100  | 55.2 | 9.5  | 0.552 |
| 8  | 1 | 100  | 56.4 | 9.7  | 0.564 |
| 9  | 1 | 100  | 56.4 | 9.7  | 0.564 |
| 10 | 1 | 100  | 56.4 | 10.0 | 0.576 |
| 11 | 1 | 100  | 57.6 | 10.0 | 0.576 |
| 12 | 1 | 100  | 57.6 | 10.5 | 0.600 |
| 13 | 1 | 100  | 60.0 | 10.5 | 0.600 |
| 14 | 1 | 100  | 60.0 | 10.5 | 0.600 |
| 15 | 1 | 100  | 60.0 | 10.5 | 0.600 |
| 16 | 1 | 100  | 60.0 | 10.5 | 0.600 |
| 17 | 1 | 100  | 60.0 | 10.5 | 0.600 |
| 18 | 1 | 100  | 60.0 | 10.5 | 0.600 |

---

1  
2  
3  
4  
5 The sensitivity, specificity, and PPV at all possible cutoff scores for BDI, TQI, and  
6  
7 all possible pairs of cutoff scores of BDI and TQI to identify both workers with depression and  
8  
9 those with comorbid disorders are listed in Table 5. The ROC curves are showed in  
10  
11 Supplementary figure 2 and the Youden Indices are listed in Table 5. The maximum value of the  
12  
13 Youden Index was derived from neither BDI nor TQI alone but from the combination of BDI  
14  
15 and TQI: 0.316 at the point of BDI score  $\geq 9$  and TQI = 2. The combination of BDI  $\geq 10$  and  
16  
17 TQI = 2, which was considered to be optimal to identify workers with depression, showed the  
18  
19 Youden Index of 0.281 to identify both workers with depression and those with comorbid  
20  
21 disorders. There was little difference in the Youden Index between the two points, and the  
22  
23 primary purpose of this screening was to identify workers with depression; therefore, the pair of  
24  
25 scores of BDI  $\geq 10$  and TQI = 2 would be adequate to identify both workers with depression  
26  
27 and those with comorbid disorders.  
28  
29  
30  
31  
32  
33  
34  
35  
36  
37  
38  
39  
40  
41  
42  
43  
44  
45  
46  
47  
48  
49  
50  
51  
52  
53  
54  
55  
56  
57  
58  
59  
60

Table 5

The sensitivity, specificity, positive predictive value (PPV), and Youden Indices for all possible cutoff scores for Beck Depression Inventory (BDI), two-question case-finding instrument (TQI), and all possible pairs of cutoff scores BDI and TQI to identify both workers who were diagnosed as having major depressive disorder (MDD) and those who were not diagnosed as having MDD but had other psychiatric disorders frequently comorbid with MDD.

|                        | Sensitivity | Specificity | PPV  | Youden Index |       |
|------------------------|-------------|-------------|------|--------------|-------|
| BDI cutoff score       |             |             |      |              |       |
| 4                      | 62.0        | 61.6        | 43.9 | 0.237        |       |
| 5                      | 58.6        | 65.0        | 44.7 | 0.236        |       |
| 6                      | 51.7        | 73.3        | 48.3 | 0.250        |       |
| 7                      | 44.8        | 80.0        | 52.0 | 0.248        |       |
| 8                      | 41.3        | 86.6        | 60.0 | 0.280        |       |
| 9                      | 41.3        | 90.0        | 66.6 | 0.313        |       |
| 10                     | 37.9        | 91.6        | 68.7 | 0.295        |       |
| 11                     | 31.0        | 93.3        | 69.2 | 0.243        |       |
| 12                     | 27.5        | 96.6        | 80.0 | 0.242        |       |
| 13                     | 27.5        | 98.3        | 88.8 | 0.259        |       |
| 14                     | 24.1        | 98.3        | 87.5 | 0.224        |       |
| 15                     | 24.1        | 98.3        | 87.5 | 0.224        |       |
| 16                     | 17.2        | 98.3        | 83.3 | 0.155        |       |
| 17                     | 13.7        | 98.3        | 80.0 | 0.121        |       |
| 18                     | 10.3        | 98.3        | 75.0 | 0.086        |       |
| TQI cutoff score       |             |             |      |              |       |
| 1                      | 48.2        | 60.0        | 36.8 | 0.082        |       |
| 2                      | 20.2        | 88.3        | 46.1 | 0.090        |       |
| Pairs of cutoff scores |             |             |      |              |       |
| BDI                    | TQI         |             |      |              |       |
| 4                      | 2           | 62.0        | 61.6 | 43.9         | 0.237 |
| 5                      | 2           | 58.6        | 65.0 | 44.7         | 0.236 |
| 6                      | 2           | 55.1        | 71.6 | 48.4         | 0.268 |

|    |    |   |      |      |      |       |
|----|----|---|------|------|------|-------|
| 1  |    |   |      |      |      |       |
| 2  |    |   |      |      |      |       |
| 3  |    |   |      |      |      |       |
| 4  |    |   |      |      |      |       |
| 5  |    |   |      |      |      |       |
| 6  | 7  | 2 | 48.2 | 78.3 | 51.8 | 0.266 |
| 7  | 8  | 2 | 48.2 | 81.6 | 56.0 | 0.299 |
| 8  | 9  | 2 | 48.2 | 83.3 | 58.3 | 0.316 |
| 9  | 10 | 2 | 44.8 | 83.3 | 56.5 | 0.281 |
| 10 | 11 | 2 | 37.9 | 85.0 | 55.0 | 0.229 |
| 11 | 12 | 2 | 34.4 | 86.6 | 55.5 | 0.211 |
| 12 | 13 | 2 | 34.4 | 86.6 | 55.5 | 0.211 |
| 13 | 14 | 2 | 31.0 | 86.6 | 52.9 | 0.177 |
| 14 | 15 | 2 | 31.0 | 86.6 | 52.9 | 0.177 |
| 15 | 16 | 2 | 27.5 | 86.6 | 50.0 | 0.142 |
| 16 | 17 | 2 | 24.1 | 86.6 | 46.6 | 0.108 |
| 17 | 18 | 2 | 20.6 | 86.6 | 42.8 | 0.073 |
| 18 | 4  | 1 | 62.0 | 48.3 | 36.7 | 0.104 |
| 19 | 5  | 1 | 58.6 | 50.0 | 36.1 | 0.086 |
| 20 | 6  | 1 | 58.6 | 55.0 | 38.6 | 0.136 |
| 21 | 7  | 1 | 55.1 | 56.6 | 38.0 | 0.118 |
| 22 | 8  | 1 | 55.1 | 58.3 | 39.0 | 0.135 |
| 23 | 9  | 1 | 55.1 | 58.3 | 39.0 | 0.135 |
| 24 | 10 | 1 | 51.7 | 58.3 | 37.5 | 0.100 |
| 25 | 11 | 1 | 48.2 | 58.3 | 37.5 | 0.100 |
| 26 | 12 | 1 | 48.2 | 60.0 | 36.8 | 0.082 |
| 27 | 13 | 1 | 48.2 | 60.0 | 36.8 | 0.082 |
| 28 | 14 | 1 | 48.2 | 60.0 | 36.8 | 0.082 |
| 29 | 15 | 1 | 48.2 | 60.0 | 36.8 | 0.082 |
| 30 | 16 | 1 | 48.2 | 60.0 | 36.8 | 0.082 |
| 31 | 17 | 1 | 48.2 | 60.0 | 36.8 | 0.082 |
| 32 | 18 | 1 | 48.2 | 60.0 | 36.8 | 0.082 |
| 33 |    |   |      |      |      |       |
| 34 |    |   |      |      |      |       |
| 35 |    |   |      |      |      |       |
| 36 |    |   |      |      |      |       |
| 37 |    |   |      |      |      |       |
| 38 |    |   |      |      |      |       |
| 39 |    |   |      |      |      |       |
| 40 |    |   |      |      |      |       |
| 41 |    |   |      |      |      |       |
| 42 |    |   |      |      |      |       |
| 43 |    |   |      |      |      |       |
| 44 |    |   |      |      |      |       |
| 45 |    |   |      |      |      |       |
| 46 |    |   |      |      |      |       |
| 47 |    |   |      |      |      |       |
| 48 |    |   |      |      |      |       |
| 49 |    |   |      |      |      |       |
| 50 |    |   |      |      |      |       |
| 51 |    |   |      |      |      |       |
| 52 |    |   |      |      |      |       |
| 53 |    |   |      |      |      |       |
| 54 |    |   |      |      |      |       |
| 55 |    |   |      |      |      |       |
| 56 |    |   |      |      |      |       |
| 57 |    |   |      |      |      |       |
| 58 |    |   |      |      |      |       |
| 59 |    |   |      |      |      |       |
| 60 |    |   |      |      |      |       |

## DISCUSSION

The present study revealed that combined implementation of BDI and TQI is useful to screen for depressed workers and the optimal pair of cutoff scores is a BDI score  $\geq 10$  and a TQI score  $\geq 2$ . Furthermore, all diagnosed workers in our sample were considered to be depressed because substance use disorder and anxiety disorder are frequently comorbid with depression and patients with bipolar disorder and dysthymia often experience depression. Our results also suggest that it is also possible to identify workers who are likely to be depressed using two instruments with the cutoff scores; therefore, the combination use is considered to be effective as a screening tool in the workplace.

Several studies have investigated the cutoff point of BDI in general populations and failed to get consistent results.[17, 24] Furthermore, there has been no study that investigated optimal cutoff scores of BDI and TQI in the workplace. Beck suggested that a total score of less than 10 is not associated with depressive disorders; scores between 10 and 18 indicate mild to moderate depression; scores between 19 and 29 correlate with moderate and severe depression; and scores of more than 30 indicate severe depression. Indeed, a BDI score  $\geq 10$  has been selected as a cutoff in many studies.[31-33] However, Lasa et al. reported that a BDI score  $\geq 13$  had high sensitivity and specificity for detecting depression and was an optimal cutoff in a general population.[33] We speculate that the difference between the cutoff detected in our study and that reported in the previous study is related to differences between the two study populations. Specifically, almost half of participants in the Lasa study were females (50.16%) and a high BDI score ( $\geq 13$ ) was more common among females than males. However, as the majority of participants in the current study were males, difference in terms of gender composition might have contributed to the low cutoff score of BDI in this study as compared to that in the Lasa study. In our study, better sensitivity and specificity was achieved by an additional use of TQI. TQI is less time-consuming; therefore, the combination use of BDI and

1  
2  
3  
4  
5 TQI as a screening tool in the workplace is considered to be reasonable, especially for  
6  
7 companies with large numbers of employees.  
8

9  
10 Several important limitations of our study design should be considered when  
11 interpreting the results. In particular, a relatively small sample size may affect the precision of  
12 calculated estimates based on the data presented in our study. Moreover, a statistically  
13 significant difference was found in the frequency distribution of TQI between Group 1 and 2,  
14 although there was no significant difference in BDI between the two groups. The score range of  
15 BDI is wide (0-60), and it has been proved that BDI can be used as a measure of depression  
16 symptom severity. On the other hand, the score range of TQI is 0 – 2, and TQI is considered to  
17 be a tool that can help to make the diagnosis of depression, but not to evaluate symptom severity.  
18 Therefore, BDI is thought to be suitable to compare the distributions of severity of depression,  
19 whereas the difference in the frequency distributions of TQI would be negligible. Finally, effect  
20 of socio-economical and clinical factors which are considered to be associated with depression  
21 (e.g., alcohol intake) were not included in the analysis.  
22  
23  
24  
25  
26  
27  
28  
29  
30  
31  
32

33  
34 We conclude that combined application of BDI and TQI is an efficient way to identify  
35 not only workers who are depressed but also those who are likely to be depressed in the  
36 workplace. Although further investigations using larger samples are needed, the BDI and TQI  
37 combination is a useful screening tool, especially for big companies that have many employees.  
38  
39  
40  
41  
42  
43  
44  
45  
46  
47  
48  
49  
50  
51  
52  
53  
54  
55  
56  
57  
58  
59  
60

**Funding**

Funding for this study was provided by research grants from the Ministry of Education, Culture, Sports, Science and Technology of Japan and the Ministry of Health, Labor and Welfare of Japan.

**Competing interests**

None

**Ethic approval**

This study was approved under the guidelines for epidemiological studies by the Nagoya University Graduate School of Medicine and Nagoya University Hospital Ethics Review Committee and was conducted in accordance with the Helsinki Declaration. Written informed consent was obtained from each subject before the start of the study.

**Contributorship Statement**

YA, BA, KY, NO substantial contributed to conception and design, acquisition of data, or analysis and interpretation of data. YA, BA, RN, TS, KY, YO and NO drafted the article or revising it critically for important intellectual content. YA, BA, RN, TS, KY, YO and NO provided final approval of the version to be published

**Data sharing statement**

There is no additional data available.



**REFERENCES**

- 1 Greenberg PE, Kessler RC, Birnbaum HG, et al. The economic burden of depression in the United States: how did it change between 1990 and 2000? *J Clin Psychiatry* 2003;**64**:1465-75.
- 2 Kessler RC, Berglund P, Demler O, et al. The epidemiology of major depressive disorder: results from the National Comorbidity Survey Replication (NCS-R). *JAMA* 2003;**289**:3095-105.
- 3 Sobocki P, Jonsson B, Angst J, et al. Cost of depression in Europe. *J Ment Health Policy Econ* 2006;**9**:87-98.
- 4 Kawakami N, Takeshima T, Ono Y, et al. Twelve-month prevalence, severity, and treatment of common mental disorders in communities in Japan: preliminary finding from the World Mental Health Japan Survey 2002-2003. *Psychiatry Clin Neurosci* 2005;**59**:441-52.
- 5 Tokuyama M, Nakao K, Seto M, et al. Predictors of first-onset major depressive episodes among white-collar workers. *Psychiatry Clin Neurosci* 2003;**57**:523-31.
- 6 Ministry of Health Labour and Welfare. The annual societal cost of suicide and depression. 2010; <http://www.mhlw.go.jp/stf/houdou/2r9852000000qvsy.html>.
- 7 World Health Organization. Information on Mental Health Disorders Management: Depression. 2006; [http://www.who.int/mental\\_health/management/depression/definition/en..](http://www.who.int/mental_health/management/depression/definition/en..)
- 8 Mathers CD, Loncar D. Projections of global mortality and burden of disease from 2002 to 2030. *PLoS Med* 2006;**3**:e442.
- 9 Patten SB, Wang JL, Williams JV, et al. Descriptive epidemiology of major depression in Canada. *Can J Psychiatry* 2006;**51**:84-90.
- 10 Kessler RC, Barber C, Birnbaum HG, et al. Depression in the workplace: effects on short-term disability. *Health Aff (Millwood)* 1999;**18**:163-71.
- 11 Alonso J, Angermeyer MC, Bernert S, et al. Disability and quality of life impact of mental disorders in Europe: results from the European Study of the Epidemiology of Mental Disorders

1  
2  
3  
4  
5 (ESEMeD) project. *Acta Psychiatr Scand*. 2004;**109**(Suppl 420):38-46.

6  
7 12 Druss BG, Schlesinger M, Allen HM, Jr. Depressive symptoms, satisfaction with health care,  
8  
9 and 2-year work outcomes in an employed population. *Am J Psychiatry* 2001;**158**:731-4.

10  
11 13 Stewart WF, Ricci JA, Chee E, et al. Cost of lost productive work time among US workers  
12  
13 with depression. *JAMA* 2003;**289**:3135-44.

14  
15 14 Kessler RC, Akiskal HS, Ames M, et al. Prevalence and effects of mood disorders on work  
16  
17 performance in a nationally representative sample of U.S. workers. *Am J Psychiatry*  
18  
19 2006;**163**:1561-8.

20  
21 15 Goldman HH, Drake RE. Mood disorders and workplace performance: half a loaf. *Am J*  
22  
23 *Psychiatry* 2006;**163**:1490-1.

24  
25 16 Wang PS, Lane M, Olfson M, et al. Twelve-month use of mental health services in the  
26  
27 United States: results from the National Comorbidity Survey Replication. *Arch Gen Psychiatry*  
28  
29 2005;**62**:629-40.

30  
31 17 Young AS, Klap R, Sherbourne CD, et al. The quality of care for depressive and anxiety  
32  
33 disorders in the United States. *Arch Gen Psychiatry* 2001;**58**:55-61.

34  
35 18 Shapiro RW, Keller MB. Initial 6-month follow-up of patients with major depressive disorder.  
36  
37 A preliminary report from the NIMH collaborative study of the psychobiology of depression. *J*  
38  
39 *Affect Disord* 1981;**3**:205-20.

40  
41 19 Ionescu R, Popescu C, Jipescu I. Predictors of outcome in depression. *Rom J Neurol*  
42  
43 *Psychiatry* 1994;**32**:153-73.

44  
45 20 Hirschfeld RM, Russell JM, Delgado PL, et al. Predictors of response to acute treatment of  
46  
47 chronic and double depression with sertraline or imipramine. *J Clin Psychiatry* 1998;**59**:669-75.

48  
49 21 de Diego-Adelino J, Portella MJ, Puigdemont D, et al. A short duration of untreated illness  
50  
51 (DUI) improves response outcomes in first-depressive episodes. *J Affect Disord*  
52  
53 2010;**120**:221-5.

54  
55 22 Okuda A, Suzuki T, Kishi T, et al. Duration of untreated illness and antidepressant  
56  
57  
58  
59  
60

- 1  
2  
3  
4  
5 fluvoxamine response in major depressive disorder. *Psychiatry Clin Neurosci* 2010;**64**:268-73.
- 6  
7 23 Suzuki T, Nobata A, Kim N, et al. Evaluation of Questionnaires (Two-question case-finding  
8  
9 instrument and Beck Depression Inventory) as a Tool for Screening and Intervention of  
10  
11 Depression in Work Place. *Seishinigaku* 2003;**45**:699-708.
- 12  
13 24 Beck AT, Beamesderfer A. Assessment of depression: the depression inventory. *Mod Probl*  
14  
15 *Pharmacopsychiatry* 1974;**7**:151-69.
- 16  
17 25 Hazama N. Validation of the Japanese version of Beck Depression Inventory (BDI). *The*  
18  
19 *Kyushu Neuro-psychiatry* 1989;**35**:28-32.
- 20  
21 26 Whooley MA, Avins AL, Miranda J, et al. Case-finding instruments for depression. Two  
22  
23 questions are as good as many. *J Gen Intern Med* 1997;**12**:439-45.
- 24  
25 27 Spitzer RL, Williams JB, Kroenke K, et al. Utility of a new procedure for diagnosing mental  
26  
27 disorders in primary care. The PRIME-MD 1000 study. *JAMA* 1994;**272**:1749-56.
- 28  
29 28 Sheehan DV, Lecrubier Y, Sheehan KH, et al. The Mini-International Neuropsychiatric  
30  
31 Interview (M.I.N.I.): the development and validation of a structured diagnostic psychiatric  
32  
33 interview for DSM-IV and ICD-10. *J Clin Psychiatry* 1998;**59**(Suppl 20):22-33.
- 34  
35 29 Greiner M, Pfeiffer D, Smith RD. Principles and practical application of the  
36  
37 receiver-operating characteristic analysis for diagnostic tests. *Prev Vet Med* 2000;**45**:23-41.
- 38  
39 30 Youden WJ. Index for rating diagnostic tests. *Cancer* 1950;**3**:32-5.
- 40  
41 31 Ahola K, Honkonen T, Kivimaki M, et al. Contribution of burnout to the association between  
42  
43 job strain and depression: the health 2000 study. *J Occup Environ Med* 2006;**48**:1023-30.
- 44  
45 32 Aben I, Verhey F, Lousberg R, et al. Validity of the beck depression inventory, hospital  
46  
47 anxiety and depression scale, SCL-90, and hamilton depression rating scale as screening  
48  
49 instruments for depression in stroke patients. *Psychosomatics* 2002;**43**:386-93.
- 50  
51 33 Lasa L, Ayuso-Mateos JL, Vazquez-Barquero JL, et al. The use of the Beck Depression  
52  
53 Inventory to screen for depression in the general population: a preliminary analysis. *J Affect*  
54  
55 *Disord* 2000;**57**:261-5.
- 56  
57  
58  
59  
60

1  
2  
3  
4  
5  
6  
7  
8  
9  
10  
11  
12  
13  
14  
15  
16  
17  
18  
19  
20  
21  
22  
23  
24  
25  
26  
27  
28  
29  
30  
31  
32  
33  
34  
35  
36  
37  
38  
39  
40  
41  
42  
43  
44  
45  
46  
47  
48  
49  
50  
51  
52  
53  
54  
55  
56  
57  
58  
59  
60

*Supplementary material*

## Combination Use of Beck Depression Inventory and Two- Question Case-Finding Instrument as a Screening Tool for Depression in the Workplace

Yasunori Adachi<sup>a</sup>, Branko Aleksic<sup>a, \*</sup>, Ryoko Nobata<sup>b</sup>, Tatsuyo Suzuki<sup>c</sup>, Keizo Yoshida<sup>d</sup>, Yuichiro Ono<sup>e</sup>, Norio Ozaki<sup>a</sup>

\*Corresponding author

<sup>a</sup>Department of Psychiatry, Graduate School of Medicine, Nagoya University, Nagoya, Japan

<sup>b</sup>Department of Psychiatry, Toyota Memorial Hospital, Toyota, Japan

<sup>c</sup>Department of Psychiatry, Seishinkai Okehazama Hospital, Toyoake, Japan

<sup>d</sup>Health Care Promotion Division, DENSO Corporation, Kariya, Japan

<sup>e</sup>Department of Public Health, Fujita Health University, Toyoake, Japan

## Supplementary table 1.

## Demographic data of participants

|        | Group1<br>(N=89) |      | Group 2<br>(N=1500) |      |
|--------|------------------|------|---------------------|------|
|        | N                | %    | N                   | %    |
| Sex    |                  |      |                     |      |
| Male   | 81               | 91.0 | 1408                | 93.9 |
| Female | 8                | 9.0  | 92                  | 6.1  |
| Age    |                  |      |                     |      |
| -19    | 0                | 0    | 0                   | 0    |
| 20-29  | 7                | 7.9  | 54                  | 3.6  |
| 30-39  | 44               | 49.4 | 655                 | 43.7 |
| 40-49  | 32               | 36.0 | 573                 | 38.2 |
| 50-59  | 6                | 6.7  | 213                 | 14.2 |
| 60-    | 0                | 0    | 5                   | 0.3  |

Supplementary figure 1.

Receiver Operation Characteristic curves for all possible cutoff scores of Beck Depression Inventory (BDI), two-question case-finding instrument (TQI), and all possible pairs of cutoff scores of BDI and TQI to identify workers who were diagnosed as having major depressive disorder. The points and corresponding lines in this figure are shifted to avoid overlapping by adding 0.03, 0.01, -0.01 and -0.03 to the sensitivity values of the groups of BDI + TQI = 2, BDI + TQI  $\geq$  1, BDI and TQI, respectively.

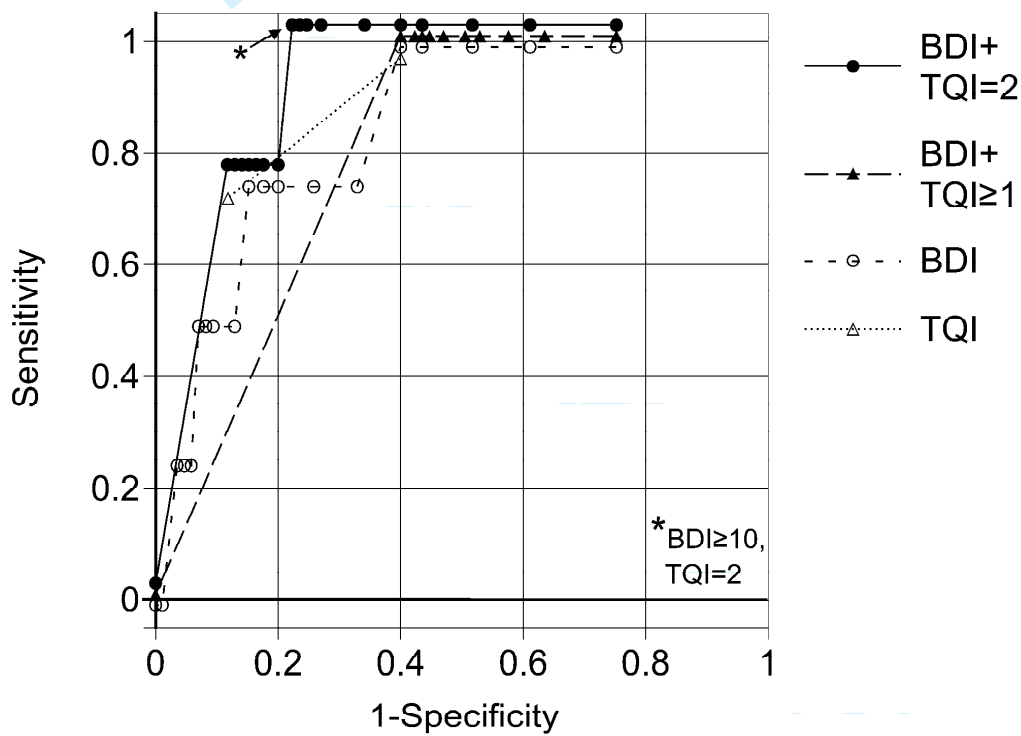

Supplementary figure 2.

Receiver Operation Characteristic curves for all possible cutoff scores of Beck Depression Inventory (BDI), two-question case-finding instrument (TQI), and all possible pairs of cutoff scores of BDI and TQI to identify both workers who were diagnosed as having major depressive disorder (MDD) and those who were not diagnosed as having MDD but having other psychiatric disorders frequently comorbid with MDD. The points and corresponding lines in this figure are shifted to avoid overlapping by adding 0.03, 0.01, -0.01 and -0.03 to the sensitivity values of the groups of BDI + TQI = 2, BDI + TQI ≥ 1, BDI and TQI, respectively.

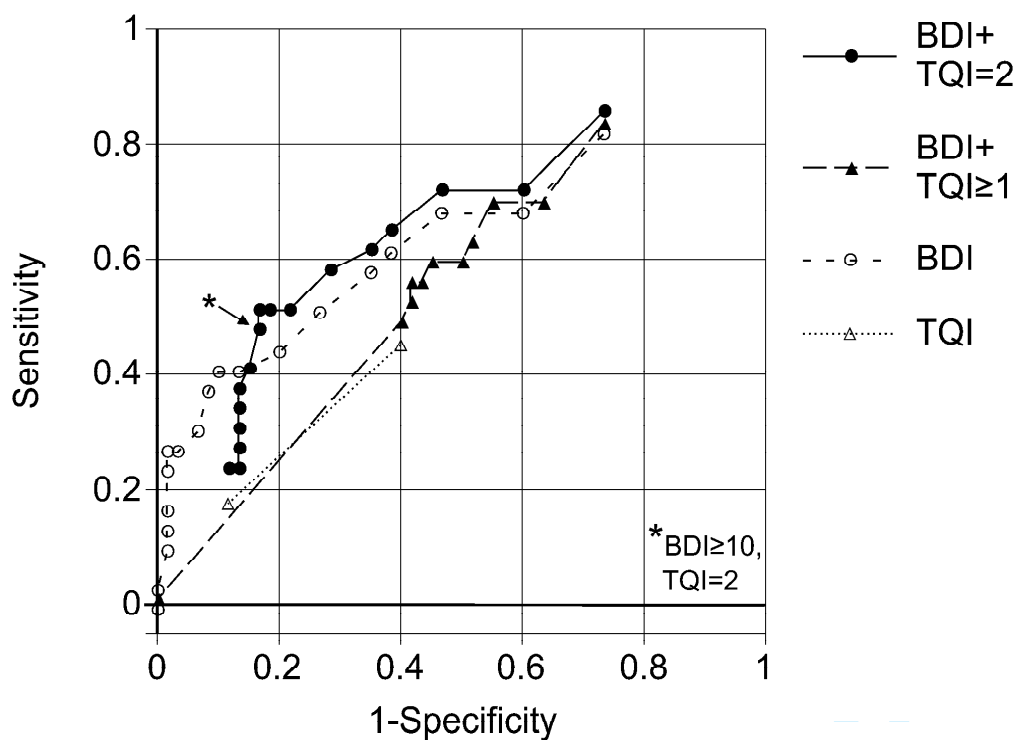



**Diagnostic test study: Combination Use of Beck Depression Inventory and Two-Question Case-Finding Instrument as a Screening Tool for Depression in the Workplace**

|                                 |                                                                                                                                                                                                                                                                                                                                                                                                                                                                                                                                                                                 |
|---------------------------------|---------------------------------------------------------------------------------------------------------------------------------------------------------------------------------------------------------------------------------------------------------------------------------------------------------------------------------------------------------------------------------------------------------------------------------------------------------------------------------------------------------------------------------------------------------------------------------|
| Journal:                        | <i>BMJ Open</i>                                                                                                                                                                                                                                                                                                                                                                                                                                                                                                                                                                 |
| Manuscript ID:                  | bmjopen-2011-000596.R1                                                                                                                                                                                                                                                                                                                                                                                                                                                                                                                                                          |
| Article Type:                   | Research                                                                                                                                                                                                                                                                                                                                                                                                                                                                                                                                                                        |
| Date Submitted by the Author:   | 21-Feb-2012                                                                                                                                                                                                                                                                                                                                                                                                                                                                                                                                                                     |
| Complete List of Authors:       | Adachi, Yasunori; Nagoya University, Graduate School of Medicine, Department of Psychiatry<br>Aleksic, Branko; Nagoya University, Graduate School of Medicine, Department of Psychiatry<br>Nobata, Ryoko; Toyota Memorial Hospital, Department of Psychaitry<br>Suzuki, Tatsuyo; Seishinkai Okehazama Hospital, Department of Psychiatry<br>Yoshida, Keizo; DENSO Corporation, Health Care Promotion Division<br>Ono, Yuichiro; Fujita Health University, Department of Public Health<br>Ozaki, Norio; Nagoya University, Graduate School of Medicine, Department of Psychiatry |
| <b>Primary Subject Heading</b>: | Mental health                                                                                                                                                                                                                                                                                                                                                                                                                                                                                                                                                                   |
| Secondary Subject Heading:      | Occupational & environmental medicine                                                                                                                                                                                                                                                                                                                                                                                                                                                                                                                                           |
| Keywords:                       | Depression & mood disorders < PSYCHIATRY, Risk management < HEALTH SERVICES ADMINISTRATION & MANAGEMENT, MENTAL HEALTH                                                                                                                                                                                                                                                                                                                                                                                                                                                          |
|                                 |                                                                                                                                                                                                                                                                                                                                                                                                                                                                                                                                                                                 |

SCHOLARONE™  
Manuscripts

only



1  
2  
3  
4  
5 **Combination Use of Beck Depression Inventory and Two-Question Case-Finding**  
6  
7 **Instrument as a Screening Tool for Depression in the Workplace**  
8  
9

10  
11  
12  
13 Corresponding author:

14 Branko Aleksic; 65 Tsurumai-cho, Showa-ku, Nagoya 466-8560, Japan

15 E-mail: branko@med.nagoya-u.ac.jp

16  
17 Tel: +81-52-744-2282

18  
19 Fax: +81-52-744-2293  
20  
21  
22  
23

24  
25 Author:

26  
27 Yasunori Adachi; Department of Psychiatry, Graduate School of Medicine, Nagoya University,

28  
29 Nagoya, Japan  
30  
31  
32

33  
34 Co-authors:

35 Branko Aleksic; Department of Psychiatry, Graduate School of Medicine, Nagoya University,

36  
37 Nagoya, Japan  
38  
39

40 Ryoko Nobata; Department of Psychiatry, Toyota Memorial Hospital, Toyota, Japan

41  
42 Tatsuyo Suzuki; Department of Psychiatry, Seishinkai Okehazama Hospital, Toyoake, Japan

43  
44 Keizo Yoshida; Health Care Promotion Division, DENSO Corporation, Kariya, Japan

45  
46 Yuichiro Ono; Department of Public Health, Fujita Health University, Toyoake, Japan

47  
48 Norio Ozaki; Department of Psychiatry, Graduate School of Medicine, Nagoya University,

49  
50 Nagoya, Japan  
51  
52

53  
54 Keywords; depression, screening, workplace, Beck Depression Inventory, Two-question

55  
56 case-finding instrument  
57  
58  
59  
60

1  
2  
3  
4  
5  
6  
7  
8  
9  
10  
11  
12  
13  
14  
15  
16  
17  
18  
19  
20  
21  
22  
23  
24  
25  
26  
27  
28  
29  
30  
31  
32  
33  
34  
35  
36  
37  
38  
39  
40  
41  
42  
43  
44  
45  
46  
47  
48  
49  
50  
51  
52  
53  
54  
55  
56  
57  
58  
59  
60

Word count; 2717 words

For peer review only

## ABSTRACT

### Background

Depression is associated with enormous economic burden, especially in high-income countries. The social cost of depression is attributed to the functional impairment of employees via absenteeism and decreased work productivity. The present study aimed to validate screening tools that could be used to identify depression among workers.

### Methods

The Beck Depression Inventory (BDI) and a two-question case-finding instrument (TQI) were administered to 89 workers (81 males and 8 females with a mean age of  $38.4 \pm 6.6$  yrs) and Mini-International Neuropsychiatric Interview (MINI) was conducted to verify the diagnosis of depression. A second group of 1500 workers (1408 males and 92 females with a mean age of  $40.9 \pm 7.2$  yrs) completed the BDI and TQI to detect possible sample bias for the distribution of depression. Specificity, sensitivity and PPV were calculated in order to obtain the optimal cutoff scores for BDI and TQI and receiver operating characteristic curves (ROC) and Youden index were applied to further refine the optimal cutoff scores.

### Results

When paired together, BDI score  $\geq 10$  and TQI score of 2 adequately identified workers who had major depressive disorder (MDD) and those who had other psychiatric disorders that are frequently comorbid with MDD.

### Conclusions

The combination of BDI score  $\geq 10$  and TQI score of 2 can adequately screen for current and potential cases of depression among workers. Furthermore, BDI and TQI offer the

1  
2  
3  
4  
5 advantage of being relatively easy to administer to a large number of workers. Early detection  
6  
7 of depression could improve treatment outcomes and decrease economic burden.  
8  
9

## 10 11 12 13 **SUMMARY**

### 14 Article focus:

15  
16  
17 Depression is associated with enormous economic burden and the social cost of depression is  
18 attributed to the functional impairment of employees.  
19

20  
21 Even though the magnitude of productivity loss from depression is substantial, a large number  
22 of depressed workers are untreated or inadequately treated.  
23

24  
25 An efficient screening tool for depression among workers is needed because it is difficult to  
26 interview and evaluate all employees.  
27

### 28 Key messages:

29  
30  
31 The combination use of the Beck Depression Inventory (BDI) and a two-question case-finding  
32 instrument (TQI) adequately identified workers who had major depressive disorder (MDD).  
33

34  
35 Furthermore, it adequately identified workers who had other psychiatric disorders that are  
36 frequently comorbid with MDD.  
37

### 38 Strength and limitations of this study:

39  
40  
41 This study presents an effective way to screen for current and potential cases of depression in  
42 the workplace, which is easy to administer to a large number of workers.  
43

44  
45 The limitations are as follows: the sample size was relatively small, the Japanese version of TQI  
46 has not been validated, not all participants were diagnosed using the diagnostic interview, and  
47 effect of socio-economical factors and clinical factors were not included in the analysis.  
48  
49  
50  
51  
52  
53  
54  
55  
56  
57  
58  
59  
60

## INTRODUCTION

Depression is a highly prevalent disorder that is associated with enormous economic costs. Major depressive disorder (MDD) was estimated to affect 18.1 million people living in United States in 2000, and to have lifetime prevalence of 16.2% and an annual prevalence of 6.6%.<sup>[1, 2]</sup> The total economic burden (both direct and indirect costs) of depression was estimated to be more than 83 billion U.S. dollars and 118 billion euros in the United States and Europe, respectively.<sup>[1, 3]</sup> In Japan, MDD was estimated to have an annual prevalence of 2.2% and 7.0% of white collar workers were reported to meet the Diagnostic and Statistical Manual of Mental Disorders, Fourth Edition (DSM-IV) criteria for major depressive episode and score more than 40 points (depressive range) on the self-rating depression scale (SDS).<sup>[4, 5]</sup> The annual societal cost of depression and suicide was estimated at 2.7 trillion yen.<sup>[6]</sup> Based on the epidemiological trends, depression will become the second-leading cause of global disease burden by 2020,<sup>[7]</sup> and is expected to rank first in disease burden in high-income countries by the 2030.<sup>[8]</sup>

The economic burden of depression is attributed to functional impairment of employees due to physical and cognitive symptoms. Moreover, the prevalence of depression is highest in the age group of 15-64 years, which corresponds to the typical working age.<sup>[9]</sup> Indeed, it was reported that depressed workers in the United States have 1.5-3.2 times more short-term work-disability days per month than people who were not depressed.<sup>[10]</sup> Furthermore, the European ESEMeD study revealed that depressed workers had 3-4 times more work-loss days per month compared to workers without depression.<sup>[11]</sup> In addition to the cost of depression-related absenteeism, presenteeism, the state in which depressed workers stay at work but have reduced productivity as a result of their condition, needs to be considered.

Even though the magnitude of productivity loss from depression is substantial, a large number of depressed workers are untreated or inadequately treated.<sup>[2, 12, 13]</sup> The increasing

1  
2  
3  
4  
5 duration of untreated illness (DUI) may be associated with worse treatment outcomes of  
6 depression.[14] Many studies have reported that DUI is a predictive factor for treatment  
7 outcome.[15-17] In addition, early treatment of the first depressive episode is important because  
8 our previous study showed that a shorter DUI implied better remission outcomes in patients  
9 with the first MDD.[18] Therefore, early identification of depressed workers is crucial in order  
10 to improve treatment outcomes and reduce cost.[2, 12] Moreover, since it is difficult to  
11 interview and evaluate all employees, an efficient screening tool for depression among workers  
12 is needed.

21 The aim of the present study was to establish an efficient way to identify workers who  
22 were diagnosed as having MDD (= workers with depression) and those who were not diagnosed  
23 as having MDD but had other psychiatric disorders that are frequently comorbid with MDD (=  
24 workers with comorbid disorders). We identified workers with depression using  
25 Mini-International Neuropsychiatric Interview (M.I.N.I.) and investigated an optimal pair of  
26 cutoff scores using a combination of Beck Depression Inventory (BDI) and a two-question  
27 case-finding instrument (TQI) for depression screening. Afterwards, we examined the  
28 specificity and sensitivity of the screening procedure for identification of both workers with  
29 depression and those with comorbid disorders. The current study is a continuation of the  
30 preliminary research conducted in 2003.[19] In addition to the larger sample size used in the  
31 current study, we evaluated the receiver operating characteristic (ROC) curves and Youden  
32 Indices in order to calculate the optimal cutoff point for depression in the workplace.  
33  
34  
35  
36  
37  
38  
39  
40  
41  
42  
43  
44  
45  
46  
47  
48  
49  
50  
51  
52  
53  
54  
55  
56  
57  
58  
59  
60

## MATERIALS AND METHODS

### Participants

We selected two groups of participants. Group 1 was established in order to investigate the optimal pair of cutoff scores of BDI and TQI for screening of depression. Participants in Group 1 answered both BDI and TQI and their diagnosis was confirmed using the M.I.N.I.[20] The M.I.N.I. Japanese version was used as a diagnostic standard for identifying cases. Recruitment occurred between January 2001 and February 2004, and it included 90 workers in a company who agreed to participate. One (1.1%) participant did not complete the questionnaires; 89 (98.8%) took part in the study. **The mean age of them was 38.4 (SD, 6.6) and 81 (91.0%) were male.**

Group 2 was established in order to investigate the sampling bias in the distribution of depression severity among Group 1, which was a relatively small sample size. In Group 2, a large number of subjects were necessary; therefore, only BDI and TQI were performed and the M.I.N.I. assessment was omitted. Recruitment occurred between July 2000 and February 2004 and 1591 workers from three companies agreed to participate. **All the employees in the companies were invited to participate in the study.** Ninety-one (5.7%) participants did not complete the questionnaire; 1500 (94.2%) took part in the study. **The mean age of them was 40.9 (SD, 7.2) and 1408 (93.9%) were male.** Demographic data of participants in each group are shown in Supplementary table 1.

### Measurements

Beck Depression Inventory (BDI)

1  
2  
3  
4  
5 The BDI, developed by Beck et al., is one of the most widely used self-rating  
6  
7 questionnaires for measuring the severity of depression.[21] The BDI-I is a 21-item scale (range  
8  
9 0-60). We used the Japanese version of BDI-I, which has been validated and is widely used in  
10  
11 Japan.[22]  
12

### 13 14 15 Two-question case-finding instrument (TQI) 16

17  
18  
19 A two-question depression-screening tool developed by Whooley et al. was extracted  
20  
21 from the Primary Care Evaluation of Mental Disorders (PRIME-MD) questionnaire.[23, 24] It  
22  
23 includes two questions about depressed mood and anhedonia: (1) “During the past month, have  
24  
25 you often been bothered by feeling down, depressed, or hopeless?” and (2) “During the past  
26  
27 month, have you often been bothered by little interest or pleasure in doing things?” The TQI  
28  
29 operates in the range of many other validated depression-screening tools, and it eases the burden  
30  
31 of administration by being succinct. For the two-question instrument, a “yes” answer to either of  
32  
33 the two questions was considered to indicate a positive result.  
34

35  
36 After obtaining consent from the author of the original work, the original TQI was  
37  
38 carefully translated into Japanese. The semantic fidelity of the Japanese version of TQI was  
39  
40 ascertained by means of back translation, whereby the first Japanese version was translated back  
41  
42 into English by an independent researcher blind to the original English version, and any  
43  
44 discrepancies between the original and the re-translations were corrected until the two were  
45  
46 semantically equivalent.  
47

### 48 49 50 Criterion Standard 51

52  
53  
54 The M.I.N.I. is a short structured diagnostic interview, developed jointly by  
55  
56 psychiatrists and clinicians in the United States and Europe, for DSM-IV and International  
57  
58  
59  
60



1  
2  
3  
4  
5 Classification of Diseases, Tenth Edition (ICD-10) psychiatric disorders.[20] With an  
6  
7 administration time of approximately 15 minutes, M.I.N.I. was designed to meet the need for a  
8  
9 short but accurate structured psychiatric interview for multicenter clinical trials and  
10  
11 epidemiology studies and to be used as a first step in outcome tracking in non-research clinical  
12  
13 settings. Trained psychiatrists and clinical psychologists performed the Japanese version of  
14  
15 M.I.N.I. structured interview, and the results were used to validate the optimal pair of cutoff  
16  
17 scores of BDI and TQI.  
18  
19

## 20 21 **Study Design and Procedure** 22 23

24  
25 In Group 1, participants were assessed by BDI and TQI and then they were  
26  
27 additionally diagnosed using the M.I.N.I. In Group 2, only BDI and TQI assessments were  
28  
29 performed. Subsequently, we investigated the frequency distributions of BDI and TQI in two  
30  
31 groups and compared them to confirm that there were no significant differences between the  
32  
33 two experimental groups. After confirming that Group 1 was not a biased sample, we explored  
34  
35 the optimal pair of cutoff scores of BDI and TQI for identifying workers with depression.  
36  
37

38 The frequency distributions of BDI and TQI were compared using Mann-Whitney U  
39  
40 test ( $p < 0.05$ ) to examine whether there were statistical significant differences between the two  
41  
42 groups. The sensitivity (Se), specificity (Sp), and positive predictive value (PPV) were  
43  
44 calculated for all possible cutoff scores for BDI, TQI, and all possible pairs of cutoff scores of  
45  
46 BDI and TQI to identify workers with depression in Group 1. Sensitivity refers to the proportion  
47  
48 of correctly identified cases and specificity to the proportion of correctly identified non-cases.  
49  
50 PPV is the probability that depressed workers identified using the optimal cutoff score are cases  
51  
52 according to the M.I.N.I.  
53

54 To determine the optimal cutoff point, the receiver operating characteristic (ROC)  
55  
56 curve was created for all possible cutoff scores of BDI, TQI, and all possible pairs of cutoff  
57  
58  
59  
60

1  
2  
3  
4  
5 scores of BDI and TQI. The Youden Indices were calculated, concurrently. The ROC curve is a  
6  
7 popular graphical method of displaying the discriminatory accuracy of a diagnostic test for  
8  
9 distinguishing between two populations. The ROC curve is a plot of Se and 1 - Sp for all  
10  
11 possible cutoff scores of the test. To evaluate the discriminatory ability of a diagnostic test, it is  
12  
13 common to summarize the information of the ROC curve into a single global value or  
14  
15 index.[25] The Youden Index is the easiest to apply and frequently used in practice. This index  
16  
17 can be defined as  $\{Se + Sp - 1\}$  and provides a criterion for the “optimal” threshold value; the  
18  
19 threshold value for which  $Se + Sp - 1$  is maximized.[26]  
20

21  
22 Furthermore, we applied the screening thresholds to identify workers with comorbid  
23  
24 disorders in additions to those with depression. The Se, Sp, and PPV were calculated for all  
25  
26 possible cutoff scores for BDI, TQI, and all possible pairs of cutoff scores of BDI and TQI to  
27  
28 identify both workers with depression and those with comorbid disorders. Subsequently, the  
29  
30 ROC curve was created and the Youden Indices were calculated.  
31  
32  
33  
34  
35  
36  
37  
38  
39  
40  
41  
42  
43  
44  
45  
46  
47  
48  
49  
50  
51  
52  
53  
54  
55  
56  
57  
58  
59  
60

## RESULTS

The frequency distributions of BDI and TQI in each group are presented in Figure 1 and Table 1, respectively. Mann-Whitney U test revealed that there was no significant difference in the frequency distribution of BDI between the two groups. However, significant difference was found in the frequency distributions of TQI between two groups ( $p = .003$ ). The diagnoses of the participants in Group 1 based on M.I.N.I. are listed in Table 2.

Table 1  
Frequency distributions of two-question case-finding instrument

| Number of 'yes' answers | Group 1 |      | Group 2 |      |
|-------------------------|---------|------|---------|------|
|                         | N       | %    | N       | %    |
| 0                       | 51      | 57.3 | 1097    | 73.1 |
| 1                       | 25      | 28.1 | 229     | 15.3 |
| 2                       | 13      | 14.6 | 174     | 11.6 |

Table 2  
The diagnoses of participants in Group 1 according to Mini-International Neuropsychiatric Interview

| Diagnosis                                                             | N  | %    |
|-----------------------------------------------------------------------|----|------|
| No diagnosis                                                          | 60 | 67.4 |
| Substance use disorder                                                | 16 | 17.9 |
| Anxiety disorder                                                      | 6  | 6.7  |
| Major depressive disorder                                             | 3  | 3.3  |
| Bipolar disorder                                                      | 1  | 1.1  |
| Dysthymia                                                             | 1  | 1.1  |
| Bipolar disorder + Substance use disorder                             | 1  | 1.1  |
| Major depressive disorder + Substance use disorder + Anxiety disorder | 1  | 1.1  |

The sensitivity, specificity, and PPV for all possible cutoff scores of BDI, TQI, and all possible pairs of cutoff scores of BDI and TQI to identify workers with depression are listed in Table 3. The ROC curves are showed in Supplementary figure 1 and the Youden Indices are listed in Table 3. The maximum value of the Youden Index was derived from neither BDI nor TQI alone but the combination of the BDI and TQI: 0.776 at the point of BDI score  $\geq 10$  and TQI score = 2. The pair of scores of BDI  $\geq 10$  and TQI = 2 was considered to be optimal to identify workers with depression; both those whose BDI score was  $\geq 10$  and those whose TQI score was = 2 were defined as “cases”.

Table 3

The sensitivity, specificity, positive predictive value (PPV), and Youden Indices for all possible cutoff scores for Beck Depression Inventory (BDI), two-question case-finding instrument (TQI), and all possible pairs of cutoff scores of BDI and TQI to identify workers who were diagnosed with major depressive disorder.

|                  | Sensitivity | Specificity | PPV  | Youden Index |
|------------------|-------------|-------------|------|--------------|
| BDI cutoff score |             |             |      |              |
| 4                | 100         | 56.4        | 9.7  | 0.564        |
| 5                | 100         | 60.0        | 10.5 | 0.600        |
| 6                | 75.0        | 67.0        | 9.6  | 0.420        |
| 7                | 75.0        | 74.1        | 12.0 | 0.491        |
| 8                | 75.0        | 80.0        | 15.0 | 0.550        |
| 9                | 75.0        | 82.3        | 16.6 | 0.573        |
| 10               | 75.0        | 84.7        | 18.7 | 0.597        |
| 11               | 50.0        | 87.0        | 15.3 | 0.370        |
| 12               | 50.0        | 90.5        | 20.0 | 0.405        |
| 13               | 50.0        | 91.7        | 22.2 | 0.417        |
| 14               | 50.0        | 92.9        | 25.0 | 0.429        |
| 15               | 50.0        | 92.9        | 25.0 | 0.429        |

|    |                        |      |      |      |       |       |
|----|------------------------|------|------|------|-------|-------|
| 1  |                        |      |      |      |       |       |
| 2  |                        |      |      |      |       |       |
| 3  |                        |      |      |      |       |       |
| 4  |                        |      |      |      |       |       |
| 5  | 16                     | 25.0 | 94.1 | 16.6 | 0.191 |       |
| 6  |                        |      |      |      |       |       |
| 7  | 17                     | 25.0 | 95.2 | 20.0 | 0.202 |       |
| 8  |                        |      |      |      |       |       |
| 9  | 18                     | 0    | 98.8 | 25.0 | 0.214 |       |
| 10 | <hr/>                  |      |      |      |       |       |
| 11 | TQI cutoff score       |      |      |      |       |       |
| 12 | <hr/>                  |      |      |      |       |       |
| 13 | 1                      | 100  | 60.0 | 10.5 | 0.600 |       |
| 14 | 2                      | 75.0 | 88.2 | 23.0 | 0.632 |       |
| 15 | <hr/>                  |      |      |      |       |       |
| 16 | Pairs of cutoff scores |      |      |      |       |       |
| 17 | <hr/>                  |      |      |      |       |       |
| 18 | BDI                    | TQI  |      |      |       |       |
| 19 | <hr/>                  |      |      |      |       |       |
| 20 | 4                      | 2    | 100  | 56.4 | 9.7   | 0.564 |
| 21 | 5                      | 2    | 100  | 60.0 | 10.5  | 0.600 |
| 22 | 6                      | 2    | 100  | 65.8 | 12.1  | 0.658 |
| 23 | 7                      | 2    | 100  | 72.9 | 14.8  | 0.729 |
| 24 | 8                      | 2    | 100  | 75.2 | 16.0  | 0.752 |
| 25 | 9                      | 2    | 100  | 76.4 | 16.6  | 0.764 |
| 26 | 10                     | 2    | 100  | 77.6 | 17.3  | 0.776 |
| 27 | 11                     | 2    | 75.0 | 80.0 | 15.0  | 0.550 |
| 28 | 12                     | 2    | 75.0 | 82.3 | 16.6  | 0.573 |
| 29 | 13                     | 2    | 75.0 | 82.3 | 16.6  | 0.573 |
| 30 | 14                     | 2    | 75.0 | 83.5 | 17.6  | 0.585 |
| 31 | 15                     | 2    | 75.0 | 83.5 | 17.6  | 0.585 |
| 32 | 16                     | 2    | 75.0 | 84.7 | 18.7  | 0.597 |
| 33 | 17                     | 2    | 75.0 | 85.8 | 20.0  | 0.608 |
| 34 | 18                     | 2    | 75.0 | 87.0 | 21.4  | 0.620 |
| 35 | 4                      | 1    | 100  | 47.0 | 8.1   | 0.470 |
| 36 | 5                      | 1    | 100  | 49.4 | 8.5   | 0.491 |
| 37 | 6                      | 1    | 100  | 52.9 | 9.0   | 0.529 |
| 38 | 7                      | 1    | 100  | 55.2 | 9.5   | 0.552 |
| 39 | 8                      | 1    | 100  | 56.4 | 9.7   | 0.564 |
| 40 | 9                      | 1    | 100  | 56.4 | 9.7   | 0.564 |
| 41 | 10                     | 1    | 100  | 56.4 | 10.0  | 0.576 |
| 42 | 11                     | 1    | 100  | 57.6 | 10.0  | 0.576 |
| 43 | 12                     | 1    | 100  | 57.6 | 10.5  | 0.600 |
| 44 |                        |      |      |      |       |       |
| 45 |                        |      |      |      |       |       |
| 46 |                        |      |      |      |       |       |
| 47 |                        |      |      |      |       |       |
| 48 |                        |      |      |      |       |       |
| 49 |                        |      |      |      |       |       |
| 50 |                        |      |      |      |       |       |
| 51 |                        |      |      |      |       |       |
| 52 |                        |      |      |      |       |       |
| 53 |                        |      |      |      |       |       |
| 54 |                        |      |      |      |       |       |
| 55 |                        |      |      |      |       |       |
| 56 |                        |      |      |      |       |       |
| 57 |                        |      |      |      |       |       |
| 58 |                        |      |      |      |       |       |
| 59 |                        |      |      |      |       |       |
| 60 |                        |      |      |      |       |       |

|    |   |     |      |      |       |
|----|---|-----|------|------|-------|
| 13 | 1 | 100 | 60.0 | 10.5 | 0.600 |
| 14 | 1 | 100 | 60.0 | 10.5 | 0.600 |
| 15 | 1 | 100 | 60.0 | 10.5 | 0.600 |
| 16 | 1 | 100 | 60.0 | 10.5 | 0.600 |
| 17 | 1 | 100 | 60.0 | 10.5 | 0.600 |
| 18 | 1 | 100 | 60.0 | 10.5 | 0.600 |

The sensitivity, specificity, and PPV at all possible cutoff scores for BDI, TQI, and all possible pairs of cutoff scores of BDI and TQI to identify both workers with depression and those with comorbid disorders are listed in Table 4. The ROC curves are showed in Supplementary figure 2 and the Youden Indices are listed in Table 4. The maximum value of the Youden Index was derived from neither BDI nor TQI alone but from the combination of BDI and TQI: 0.316 at the point of BDI score  $\geq 9$  and TQI = 2. The combination of BDI  $\geq 10$  and TQI = 2, which was considered to be optimal to identify workers with depression, showed the Youden Index of 0.281 to identify both workers with depression and those with comorbid disorders. There was little difference in the Youden Index between the two points, and the primary purpose of this screening was to identify workers with depression; therefore, the pair of scores of BDI  $\geq 10$  and TQI = 2 would be adequate to identify both workers with depression and those with comorbid disorders.

Table 4

The sensitivity, specificity, positive predictive value (PPV), and Youden Indices for all possible cutoff scores for Beck Depression Inventory (BDI), two-question case-finding instrument (TQI), and all possible pairs of cutoff scores BDI and TQI to identify both workers who were diagnosed as having major depressive disorder (MDD) and those who were not diagnosed as having MDD but had other psychiatric disorders frequently comorbid with MDD.

|                        |     | Sensitivity | Specificity | PPV  | Youden Index |       |
|------------------------|-----|-------------|-------------|------|--------------|-------|
| BDI cutoff score       |     |             |             |      |              |       |
|                        | 4   | 62.0        | 61.6        | 43.9 | 0.237        |       |
|                        | 5   | 58.6        | 65.0        | 44.7 | 0.236        |       |
|                        | 6   | 51.7        | 73.3        | 48.3 | 0.250        |       |
|                        | 7   | 44.8        | 80.0        | 52.0 | 0.248        |       |
|                        | 8   | 41.3        | 86.6        | 60.0 | 0.280        |       |
|                        | 9   | 41.3        | 90.0        | 66.6 | 0.313        |       |
|                        | 10  | 37.9        | 91.6        | 68.7 | 0.295        |       |
|                        | 11  | 31.0        | 93.3        | 69.2 | 0.243        |       |
|                        | 12  | 27.5        | 96.6        | 80.0 | 0.242        |       |
|                        | 13  | 27.5        | 98.3        | 88.8 | 0.259        |       |
|                        | 14  | 24.1        | 98.3        | 87.5 | 0.224        |       |
|                        | 15  | 24.1        | 98.3        | 87.5 | 0.224        |       |
|                        | 16  | 17.2        | 98.3        | 83.3 | 0.155        |       |
|                        | 17  | 13.7        | 98.3        | 80.0 | 0.121        |       |
|                        | 18  | 10.3        | 98.3        | 75.0 | 0.086        |       |
| TQI cutoff score       |     |             |             |      |              |       |
|                        | 1   | 48.2        | 60.0        | 36.8 | 0.082        |       |
|                        | 2   | 20.2        | 88.3        | 46.1 | 0.090        |       |
| Pairs of cutoff scores |     |             |             |      |              |       |
|                        | BDI | TQI         |             |      |              |       |
|                        | 4   | 2           | 62.0        | 61.6 | 43.9         | 0.237 |
|                        | 5   | 2           | 58.6        | 65.0 | 44.7         | 0.236 |
|                        | 6   | 2           | 55.1        | 71.6 | 48.4         | 0.268 |
|                        | 7   | 2           | 48.2        | 78.3 | 51.8         | 0.266 |
|                        | 8   | 2           | 48.2        | 81.6 | 56.0         | 0.299 |
|                        | 9   | 2           | 48.2        | 83.3 | 58.3         | 0.316 |
|                        | 10  | 2           | 44.8        | 83.3 | 56.5         | 0.281 |
|                        | 11  | 2           | 37.9        | 85.0 | 55.0         | 0.229 |
|                        | 12  | 2           | 34.4        | 86.6 | 55.5         | 0.211 |
|                        | 13  | 2           | 34.4        | 86.6 | 55.5         | 0.211 |

1  
2  
3  
4  
5  
6  
7  
8  
9  
10  
11  
12  
13  
14  
15  
16  
17  
18  
19  
20  
21  
22  
23  
24  
25  
26  
27  
28  
29  
30  
31  
32  
33  
34  
35  
36  
37  
38  
39  
40  
41  
42  
43  
44  
45  
46  
47  
48  
49  
50  
51  
52  
53  
54  
55  
56  
57  
58  
59  
60

|    |   |      |      |      |       |
|----|---|------|------|------|-------|
| 14 | 2 | 31.0 | 86.6 | 52.9 | 0.177 |
| 15 | 2 | 31.0 | 86.6 | 52.9 | 0.177 |
| 16 | 2 | 27.5 | 86.6 | 50.0 | 0.142 |
| 17 | 2 | 24.1 | 86.6 | 46.6 | 0.108 |
| 18 | 2 | 20.6 | 86.6 | 42.8 | 0.073 |
| 4  | 1 | 62.0 | 48.3 | 36.7 | 0.104 |
| 5  | 1 | 58.6 | 50.0 | 36.1 | 0.086 |
| 6  | 1 | 58.6 | 55.0 | 38.6 | 0.136 |
| 7  | 1 | 55.1 | 56.6 | 38.0 | 0.118 |
| 8  | 1 | 55.1 | 58.3 | 39.0 | 0.135 |
| 9  | 1 | 55.1 | 58.3 | 39.0 | 0.135 |
| 10 | 1 | 51.7 | 58.3 | 37.5 | 0.100 |
| 11 | 1 | 48.2 | 58.3 | 37.5 | 0.100 |
| 12 | 1 | 48.2 | 60.0 | 36.8 | 0.082 |
| 13 | 1 | 48.2 | 60.0 | 36.8 | 0.082 |
| 14 | 1 | 48.2 | 60.0 | 36.8 | 0.082 |
| 15 | 1 | 48.2 | 60.0 | 36.8 | 0.082 |
| 16 | 1 | 48.2 | 60.0 | 36.8 | 0.082 |
| 17 | 1 | 48.2 | 60.0 | 36.8 | 0.082 |
| 18 | 1 | 48.2 | 60.0 | 36.8 | 0.082 |

---



## DISCUSSION

The present study revealed that combined implementation of BDI and TQI is useful to screen for depressed workers and the optimal pair of cutoff scores is a BDI score  $\geq 10$  and a TQI score  $\geq 2$ . Furthermore, all diagnosed workers in our sample were considered to be depressed because substance use disorder and anxiety disorder are frequently comorbid with depression and patients with bipolar disorder and dysthymia often experience depression. Our results also suggest that it is also possible to identify workers who are likely to be depressed using two instruments with the cutoff scores; therefore, the combination use is considered to be effective as a screening tool in the workplace.

Several studies have investigated the cutoff point of BDI in general populations and failed to get consistent results.[13, 21] Furthermore, there has been no study that investigated optimal cutoff scores of BDI and TQI in the workplace. Beck suggested that a total score of less than 10 is not associated with depressive disorders; scores between 10 and 18 indicate mild to moderate depression; scores between 19 and 29 correlate with moderate and severe depression; and scores of more than 30 indicate severe depression. Indeed, a BDI score  $\geq 10$  has been selected as a cutoff in many studies.[27-29] However, Lasa et al. reported that a BDI score  $\geq 13$  had high sensitivity and specificity for detecting depression and was an optimal cutoff in a general population.[29] We speculate that the difference between the cutoff detected in our study and that reported in the previous study is related to differences between the two study populations. Specifically, almost half of participants in the Lasa study were females (50.16%) and a high BDI score ( $\geq 13$ ) was more common among females than males. However, as the majority of participants in the current study were males, difference in terms of gender composition might have contributed to the low cutoff score of BDI in this study as compared to that in the Lasa study. In our study, better sensitivity and specificity was achieved by an additional use of TQI. TQI is less time-consuming; therefore, the combination use of BDI and

1  
2  
3  
4  
5 TQI as a screening tool in the workplace is considered to be reasonable, especially for  
6  
7 companies with large numbers of employees.  
8

9  
10 Several important limitations of our study design should be considered when  
11 interpreting the results. In particular, a relatively small sample size may affect the precision of  
12 calculated estimates based on the data presented in our study. **Other Methodological problems**  
13 **are as follows: the Japanese version of TQI has not been validated, and the MINI interview was**  
14 **not performed in the larger group. Validation of the Japanese version of TQI would have**  
15 **contributed to improve accuracy of the present results. Performing the diagnostic interview even**  
16 **in shorter versions of MINI in the larger group would have contributed to increase the number**  
17 **of subjects for analysis.** Moreover, a statistically significant difference was found in the  
18 frequency distribution of TQI between Group 1 and 2, although there was no significant  
19 difference in BDI between the two groups. The score range of BDI is wide (0-60), and it has  
20 been proved that BDI can be used as a measure of depression symptom severity. On the other  
21 hand, the score range of TQI is 0 – 2, and TQI is considered to be a tool that can help to make  
22 the diagnosis of depression, but not to evaluate symptom severity. Therefore, BDI is thought to  
23 be suitable to compare the distributions of severity of depression, whereas the difference in the  
24 frequency distributions of TQI would be negligible. Finally, effect of socio-economical and  
25 clinical factors which are considered to be associated with depression (e.g., alcohol intake) were  
26 not included in the analysis.  
27  
28  
29  
30  
31  
32  
33  
34  
35  
36  
37  
38  
39  
40  
41  
42

43  
44 We conclude that combined application of BDI and TQI is an efficient way to identify  
45 not only workers who are depressed but also those who are likely to be depressed in the  
46 workplace. Although further investigations using larger samples are needed, the BDI and TQI  
47 combination is a useful screening tool, especially for big companies that have many employees.  
48  
49  
50  
51  
52  
53  
54

## 55 56 **Funding** 57 58 59 60

1  
2  
3  
4  
5  
6  
7 Funding for this study was provided by research grants from the Ministry of Education,  
8  
9 Culture, Sports, Science and Technology of Japan and the Ministry of Health, Labor and  
10  
11 Welfare of Japan.  
12

### 13 14 15 **Competing interests**

16  
17  
18  
19 None  
20  
21

### 22 23 **Ethic approval**

24  
25  
26  
27 This study was approved under the guidelines for epidemiological studies by the  
28  
29 Nagoya University Graduate School of Medicine and Nagoya University Hospital Ethics  
30  
31 Review Committee and was conducted in accordance with the Helsinki Declaration. Written  
32  
33 informed consent was obtained from each subject before the start of the study.  
34  
35

### 36 37 **Data sharing**

38  
39 There is no additional data available.  
40  
41

### 42 43 **Contributorship**

44  
45 YA, BA, KY, NO substantial contributed to conception and design, acquisition of data, or  
46  
47 analysis and interpretation of data. YA, BA, RN, TS, KY, YO and NO drafted the article or  
48  
49 revising it critically for important intellectual content. YA, BA, RN, TS, KY, YO and NO  
50  
51 provided final approval of the version to be published.  
52  
53  
54  
55  
56  
57  
58  
59  
60

**REFERENCES**

- 1 Greenberg PE, Kessler RC, Birnbaum HG, et al. The economic burden of depression in the United States: how did it change between 1990 and 2000? *J Clin Psychiatry* 2003;**64**:1465-75.
- 2 Kessler RC, Berglund P, Demler O, et al. The epidemiology of major depressive disorder: results from the National Comorbidity Survey Replication (NCS-R). *JAMA* 2003;**289**:3095-105.
- 3 Sobocki P, Jonsson B, Angst J, et al. Cost of depression in Europe. *J Ment Health Policy Econ* 2006;**9**:87-98.
- 4 Kawakami N, Takeshima T, Ono Y, et al. Twelve-month prevalence, severity, and treatment of common mental disorders in communities in Japan: preliminary finding from the World Mental Health Japan Survey 2002-2003. *Psychiatry Clin Neurosci* 2005;**59**:441-52.
- 5 Tokuyama M, Nakao K, Seto M, et al. Predictors of first-onset major depressive episodes among white-collar workers. *Psychiatry Clin Neurosci* 2003;**57**:523-31.
- 6 Ministry of Health Labour and Welfare. The annual societal cost of suicide and depression. 2010; <http://www.mhlw.go.jp/stf/houdou/2r9852000000qvsy.html>.
- 7 World Health Organization. Information on Mental Health Disorders Management: Depression. 2006; [http://www.who.int/mental\\_health/management/depression/definition/en..](http://www.who.int/mental_health/management/depression/definition/en..)
- 8 Mathers CD, Loncar D. Projections of global mortality and burden of disease from 2002 to 2030. *PLoS Med* 2006;**3**:e442.
- 9 Patten SB, Wang JL, Williams JV, et al. Descriptive epidemiology of major depression in Canada. *Can J Psychiatry* 2006;**51**:84-90.
- 10 Kessler RC, Barber C, Birnbaum HG, et al. Depression in the workplace: effects on short-term disability. *Health Aff (Millwood)* 1999;**18**:163-71.
- 11 Alonso J, Angermeyer MC, Bernert S, et al. Disability and quality of life impact of mental

1  
2  
3  
4  
5 disorders in Europe: results from the European Study of the Epidemiology of Mental Disorders  
6 (ESEMED) project. *Acta Psychiatr Scand*. 2004;**109**(Suppl 420):38-46.

7  
8  
9 12 Wang PS, Lane M, Olfson M, et al. Twelve-month use of mental health services in the  
10 United States: results from the National Comorbidity Survey Replication. *Arch Gen Psychiatry*  
11 2005;**62**:629-40.

12  
13  
14 13 Young AS, Klap R, Sherbourne CD, et al. The quality of care for depressive and anxiety  
15 disorders in the United States. *Arch Gen Psychiatry* 2001;**58**:55-61.

16  
17  
18 14 Shapiro RW, Keller MB. Initial 6-month follow-up of patients with major depressive disorder.  
19 A preliminary report from the NIMH collaborative study of the psychobiology of depression. *J*  
20 *Affect Disord* 1981;**3**:205-20.

21  
22  
23 15 Ionescu R, Popescu C, Jipescu I. Predictors of outcome in depression. *Rom J Neurol*  
24 *Psychiatry* 1994;**32**:153-73.

25  
26  
27 16 Hirschfeld RM, Russell JM, Delgado PL, et al. Predictors of response to acute treatment of  
28 chronic and double depression with sertraline or imipramine. *J Clin Psychiatry* 1998;**59**:669-75.

29  
30  
31 17 de Diego-Adelino J, Portella MJ, Puigdemont D, et al. A short duration of untreated illness  
32 (DUI) improves response outcomes in first-depressive episodes. *J Affect Disord*  
33 2010;**120**:221-5.

34  
35  
36 18 Okuda A, Suzuki T, Kishi T, et al. Duration of untreated illness and antidepressant  
37 fluvoxamine response in major depressive disorder. *Psychiatry Clin Neurosci* 2010;**64**:268-73.

38  
39  
40 19 Suzuki T, Nobata A, Kim N, et al. Evaluation of Questionnaires (Two-question case-finding  
41 instrument and Beck Depression Inventory) as a Tool for Screening and Intervention of  
42 Depression in Work Place. *Seishinigaku* 2003;**45**:699-708.

43  
44  
45 20 Sheehan DV, Lecrubier Y, Sheehan KH, et al. The Mini-International Neuropsychiatric  
46 Interview (M.I.N.I.): the development and validation of a structured diagnostic psychiatric  
47 interview for DSM-IV and ICD-10. *J Clin Psychiatry* 1998;**59**(Suppl 20):22-33.

48  
49  
50 21 Beck AT, Beamesderfer A. Assessment of depression: the depression inventory. *Mod Probl*  
51  
52  
53  
54  
55  
56  
57  
58  
59  
60

1  
2  
3  
4  
5 Pharmacopsychiatry 1974;**7**:151-69.

6  
7 22 Hazama N. Validation of the Japanese version of Beck Depression Inventory (BDI). The  
8  
9 Kyushu Neuro-psychiatry 1989;**35**:28-32.

10  
11 23 Whooley MA, Avins AL, Miranda J, et al. Case-finding instruments for depression. Two  
12  
13 questions are as good as many. J Gen Intern Med 1997;**12**:439-45.

14  
15 24 Spitzer RL, Williams JB, Kroenke K, et al. Utility of a new procedure for diagnosing mental  
16  
17 disorders in primary care. The PRIME-MD 1000 study. JAMA 1994;**272**:1749-56.

18  
19 25 Greiner M, Pfeiffer D, Smith RD. Principles and practical application of the  
20  
21 receiver-operating characteristic analysis for diagnostic tests. Prev Vet Med 2000;**45**:23-41.

22  
23 26 Youden WJ. Index for rating diagnostic tests. Cancer 1950;**3**:32-5.

24  
25 27 Ahola K, Honkonen T, Kivimaki M, et al. Contribution of burnout to the association between  
26  
27 job strain and depression: the health 2000 study. J Occup Environ Med 2006;**48**:1023-30.

28  
29 28 Aben I, Verhey F, Lousberg R, et al. Validity of the beck depression inventory, hospital  
30  
31 anxiety and depression scale, SCL-90, and hamilton depression rating scale as screening  
32  
33 instruments for depression in stroke patients. Psychosomatics 2002;**43**:386-93.

34  
35 29 Lasa L, Ayuso-Mateos JL, Vazquez-Barquero JL, et al. The use of the Beck Depression  
36  
37 Inventory to screen for depression in the general population: a preliminary analysis. J Affect  
38  
39 Disord 2000;**57**:261-5.  
40  
41  
42  
43  
44  
45  
46  
47  
48  
49  
50  
51  
52  
53  
54  
55  
56  
57  
58  
59  
60

1  
2  
3  
4  
5  
6  
7  
8  
9  
10  
11  
12  
13  
14  
15  
16  
17  
18  
19  
20  
21  
22  
23  
24  
25  
26  
27  
28  
29  
30  
31  
32  
33  
34  
35  
36  
37  
38  
39  
40  
41  
42  
43  
44  
45  
46  
47  
48  
49  
50  
51  
52  
53  
54  
55  
56  
57  
58  
59  
60

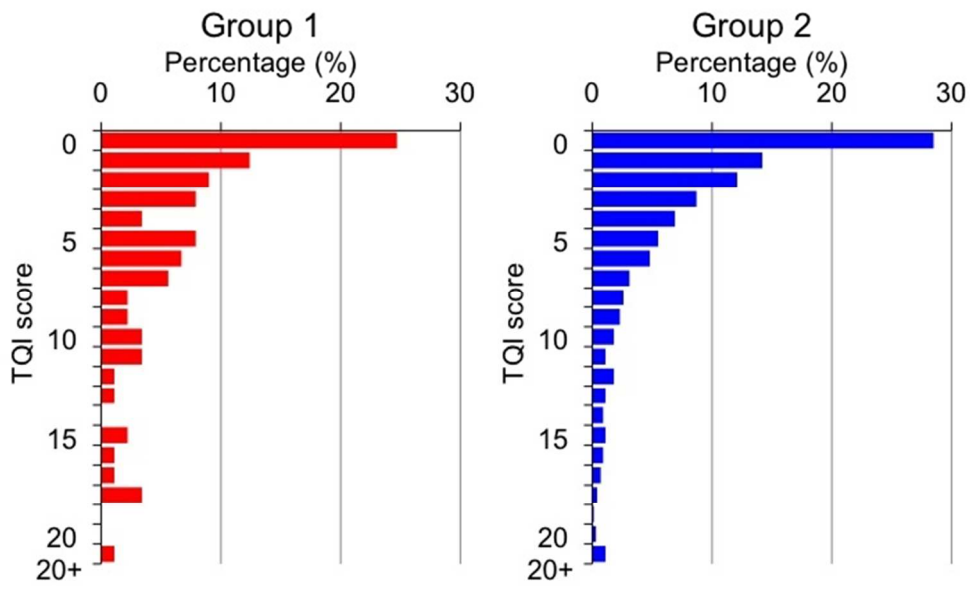

254x160mm (72 x 72 DPI)

Review only

1  
2  
3  
4  
5  
6  
7  
8  
9  
10  
11  
12  
13  
14  
15  
16  
17  
18  
19  
20  
21  
22  
23  
24  
25  
26  
27  
28  
29  
30  
31  
32  
33  
34  
35  
36  
37  
38  
39  
40  
41  
42  
43  
44  
45  
46  
47  
48  
49  
50  
51  
52  
53  
54  
55  
56  
57  
58  
59  
60

*Supplementary material*

## Combination Use of Beck Depression Inventory and Two- Question Case-Finding Instrument as a Screening Tool for Depression in the Workplace

Yasunori Adachi<sup>a</sup>, Branko Aleksic<sup>a, \*</sup>, Ryoko Nobata<sup>b</sup>, Tatsuyo Suzuki<sup>c</sup>, Keizo Yoshida<sup>d</sup>, Yuichiro Ono<sup>e</sup>, Norio Ozaki<sup>a</sup>

\*Corresponding author

<sup>a</sup>Department of Psychiatry, Graduate School of Medicine, Nagoya University, Nagoya, Japan

<sup>b</sup>Department of Psychiatry, Toyota Memorial Hospital, Toyota, Japan

<sup>c</sup>Department of Psychiatry, Seishinkai Okehazama Hospital, Toyoake, Japan

<sup>d</sup>Health Care Promotion Division, DENSO Corporation, Kariya, Japan

<sup>e</sup>Department of Public Health, Fujita Health University, Toyoake, Japan



1  
2  
3  
4  
5  
6  
7  
8  
9  
10  
11  
12  
13  
14  
15  
16  
17  
18  
19  
20  
21  
22  
23  
24  
25  
26  
27  
28  
29  
30  
31  
32  
33  
34  
35  
36  
37  
38  
39  
40  
41  
42  
43  
44  
45  
46  
47  
48  
49  
50  
51  
52  
53  
54  
55  
56  
57  
58  
59  
60

Supplementary table 1.  
Demographic data of participants

|        | Group1<br>(N=89) |      | Group 2<br>(N=1500) |      |
|--------|------------------|------|---------------------|------|
|        | N                | %    | N                   | %    |
| Sex    |                  |      |                     |      |
| Male   | 81               | 91.0 | 1408                | 93.9 |
| Female | 8                | 9.0  | 92                  | 6.1  |
| Age    |                  |      |                     |      |
| -19    | 0                | 0    | 0                   | 0    |
| 20-29  | 7                | 7.9  | 54                  | 3.6  |
| 30-39  | 44               | 49.4 | 655                 | 43.7 |
| 40-49  | 32               | 36.0 | 573                 | 38.2 |
| 50-59  | 6                | 6.7  | 213                 | 14.2 |
| 60-    | 0                | 0    | 5                   | 0.3  |

For peer review only

Supplementary figure 1.

Receiver Operation Characteristic curves for all possible cutoff scores of Beck Depression Inventory (BDI), two-question case-finding instrument (TQI), and all possible pairs of cutoff scores of BDI and TQI to identify workers who were diagnosed as having major depressive disorder. The points and corresponding lines in this figure are shifted to avoid overlapping by adding 0.03, 0.01, -0.01 and -0.03 to the sensitivity values of the groups of BDI + TQI = 2, BDI + TQI ≥ 1, BDI and TQI, respectively.

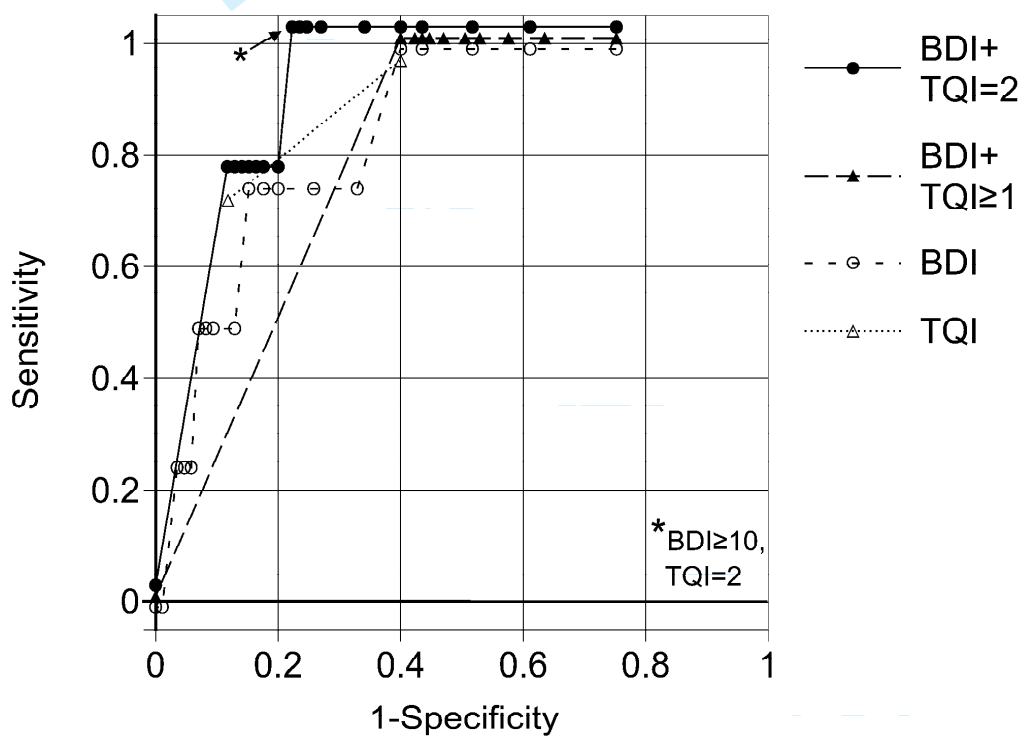

Supplementary figure 2.

Receiver Operation Characteristic curves for all possible cutoff scores of Beck Depression Inventory (BDI), two-question case-finding instrument (TQI), and all possible pairs of cutoff scores of BDI and TQI to identify both workers who were diagnosed as having major depressive disorder (MDD) and those who were not diagnosed as having MDD but having other psychiatric disorders frequently comorbid with MDD. The points and corresponding lines in this figure are shifted to avoid overlapping by adding 0.03, 0.01, -0.01 and -0.03 to the sensitivity values of the groups of BDI + TQI = 2, BDI + TQI  $\geq$  1, BDI and TQI, respectively.





**Diagnostic test study: Combination Use of Beck Depression Inventory and Two-Question Case-Finding Instrument as a Screening Tool for Depression in the Workplace**

|                                 |                                                                                                                                                                                                                                                                                                                                                                                                                                                                                                                                                                                 |
|---------------------------------|---------------------------------------------------------------------------------------------------------------------------------------------------------------------------------------------------------------------------------------------------------------------------------------------------------------------------------------------------------------------------------------------------------------------------------------------------------------------------------------------------------------------------------------------------------------------------------|
| Journal:                        | <i>BMJ Open</i>                                                                                                                                                                                                                                                                                                                                                                                                                                                                                                                                                                 |
| Manuscript ID:                  | bmjopen-2011-000596.R2                                                                                                                                                                                                                                                                                                                                                                                                                                                                                                                                                          |
| Article Type:                   | Research                                                                                                                                                                                                                                                                                                                                                                                                                                                                                                                                                                        |
| Date Submitted by the Author:   | 21-Mar-2012                                                                                                                                                                                                                                                                                                                                                                                                                                                                                                                                                                     |
| Complete List of Authors:       | Adachi, Yasunori; Nagoya University, Graduate School of Medicine, Department of Psychiatry<br>Aleksic, Branko; Nagoya University, Graduate School of Medicine, Department of Psychiatry<br>Nobata, Ryoko; Toyota Memorial Hospital, Department of Psychiatry<br>Suzuki, Tatsuyo; Seishinkai Okehazama Hospital, Department of Psychiatry<br>Yoshida, Keizo; DENSO Corporation, Health Care Promotion Division<br>Ono, Yuichiro; Fujita Health University, Department of Public Health<br>Ozaki, Norio; Nagoya University, Graduate School of Medicine, Department of Psychiatry |
| <b>Primary Subject Heading</b>: | Mental health                                                                                                                                                                                                                                                                                                                                                                                                                                                                                                                                                                   |
| Secondary Subject Heading:      | Occupational & environmental medicine, Diagnostics                                                                                                                                                                                                                                                                                                                                                                                                                                                                                                                              |
| Keywords:                       | Depression & mood disorders < PSYCHIATRY, Risk management < HEALTH SERVICES ADMINISTRATION & MANAGEMENT, MENTAL HEALTH                                                                                                                                                                                                                                                                                                                                                                                                                                                          |
|                                 |                                                                                                                                                                                                                                                                                                                                                                                                                                                                                                                                                                                 |

SCHOLARONE™  
Manuscripts

1  
2  
3  
4  
5 **Combination Use of Beck Depression Inventory and Two-Question Case-Finding**  
6  
7 **Instrument as a Screening Tool for Depression in the Workplace**  
8  
9

10  
11  
12  
13 Corresponding author:

14 Branko Aleksic; 65 Tsurumai-cho, Showa-ku, Nagoya 466-8560, Japan

15 E-mail: branko@med.nagoya-u.ac.jp

16  
17 Tel: +81-52-744-2282

18  
19 Fax: +81-52-744-2293  
20  
21  
22  
23

24  
25 Author:

26  
27 Yasunori Adachi; Department of Psychiatry, Graduate School of Medicine, Nagoya University,  
28

29 Nagoya, Japan  
30  
31  
32

33  
34 Co-authors:

35 Branko Aleksic; Department of Psychiatry, Graduate School of Medicine, Nagoya University,  
36

37 Nagoya, Japan  
38  
39

40 Ryoko Nobata; Department of Psychiatry, Toyota Memorial Hospital, Toyota, Japan

41 Tatsuyo Suzuki; Department of Psychiatry, Seishinkai Okehazama Hospital, Toyoake, Japan

42 Keizo Yoshida; Health Care Promotion Division, DENSO Corporation, Kariya, Japan

43 Yuichiro Ono; Department of Public Health, Fujita Health University, Toyoake, Japan

44 Norio Ozaki; Department of Psychiatry, Graduate School of Medicine, Nagoya University,  
45

46 Nagoya, Japan  
47  
48  
49

50  
51  
52  
53  
54 Keywords; depression, screening, workplace, Beck Depression Inventory, Two-question

55 case-finding instrument  
56  
57  
58  
59  
60

Word count; 2717 words

For peer review only

1  
2  
3  
4  
5  
6  
7  
8  
9  
10  
11  
12  
13  
14  
15  
16  
17  
18  
19  
20  
21  
22  
23  
24  
25  
26  
27  
28  
29  
30  
31  
32  
33  
34  
35  
36  
37  
38  
39  
40  
41  
42  
43  
44  
45  
46  
47  
48  
49  
50  
51  
52  
53  
54  
55  
56  
57  
58  
59  
60

**ABSTRACT**

Objectives: The present study aimed to validate screening tools that could be used to identify depression among workers.

Design: Diagnostic test study.

Settings: Workers from three Japanese companies agreed to participate.

Participants: Recruitment for the group 1 occurred between January 2001 and February 2004, and 89 participants (81 males and 8 females with a mean age of  $38.4 \pm 6.6$  yrs) (98.8%) took part in the study. Recruitment for the group 2 occurred between July 2000 and February 2004 and 1500 participants (1408 males and 92 females with a mean age of  $40.9 \pm 7.2$  yrs) (94.2%) took part in the study. Demographic data are shown in Supplementary table 1.

Interventions: -

Primary and secondary outcome measures: The Beck Depression Inventory (BDI) and a two-question case-finding instrument (TQI) were administered to 89 workers and Mini-International Neuropsychiatric Interview was conducted to verify the diagnosis of depression. A second group of 1500 workers completed the BDI and TQI to detect possible sample bias for the distribution of depression. Specificity, sensitivity and PPV were calculated in order to obtain the optimal cutoff scores for BDI and TQI and receiver operating characteristic curves (ROC) and Youden index were applied to further refine the optimal cutoff scores.

Results: When paired together, BDI score  $\geq 10$  and TQI score of 2 adequately identified workers who had major depressive disorder (MDD) and those who had other psychiatric disorders that are frequently comorbid with MDD.

Conclusions: The combination of BDI score  $\geq 10$  and TQI score of 2 can adequately screen for current and potential cases of depression among workers. Furthermore, BDI and TQI offer the advantage of being relatively easy to administer to a large number of workers. Early

1  
2  
3  
4  
5 detection of depression could improve treatment outcomes and decrease economic burden.  
6

7 Trail registration:-  
8  
9  
10  
11  
12  
13  
14  
15  
16  
17  
18  
19  
20  
21  
22  
23  
24  
25  
26  
27  
28  
29  
30  
31  
32  
33  
34  
35  
36  
37  
38  
39  
40  
41  
42  
43  
44  
45  
46  
47  
48  
49  
50  
51  
52  
53  
54  
55  
56  
57  
58  
59  
60



## INTRODUCTION

Depression is a highly prevalent disorder that is associated with enormous economic costs. Major depressive disorder (MDD) was estimated to affect 18.1 million people living in United States in 2000, and to have lifetime prevalence of 16.2% and an annual prevalence of 6.6%. [1, 2] The total economic burden (both direct and indirect costs) of depression was estimated to be more than 83 billion U.S. dollars and 118 billion euros in the United States and Europe, respectively. [1, 3] In Japan, MDD was estimated to have an annual prevalence of 2.2% and 7.0% of white collar workers were reported to meet the Diagnostic and Statistical Manual of Mental Disorders, Fourth Edition (DSM-IV) criteria for major depressive episode and score more than 40 points (depressive range) on the self-rating depression scale (SDS). [4, 5] The annual societal cost of depression and suicide was estimated at 2.7 trillion yen. [6] Based on the epidemiological trends, depression will become the second-leading cause of global disease burden by 2020, [7] and is expected to rank first in disease burden in high-income countries by the 2030. [8]

The economic burden of depression is attributed to functional impairment of employees due to physical and cognitive symptoms. Moreover, the prevalence of depression is highest in the age group of 15-64 years, which corresponds to the typical working age. [9] Indeed, it was reported that depressed workers in the United States have 1.5-3.2 times more short-term work-disability days per month than people who were not depressed. [10] Furthermore, the European ESEMeD study revealed that depressed workers had 3-4 times more work-loss days per month compared to workers without depression. [11] In addition to the cost of depression-related absenteeism, presenteeism, the state in which depressed workers stay at work but have reduced productivity as a result of their condition, needs to be considered.

Even though the magnitude of productivity loss from depression is substantial, a large number of depressed workers are untreated or inadequately treated. [2, 12, 13] The increasing

1  
2  
3  
4  
5 duration of untreated illness (DUI) may be associated with worse treatment outcomes of  
6 depression.[14] Many studies have reported that DUI is a predictive factor for treatment  
7 outcome.[15-17] In addition, early treatment of the first depressive episode is important because  
8 our previous study showed that a shorter DUI implied better remission outcomes in patients  
9 with the first MDD.[18] Therefore, early identification of depressed workers is crucial in order  
10 to improve treatment outcomes and reduce cost.[2, 12] Moreover, since it is difficult to  
11 interview and evaluate all employees, an efficient screening tool for depression among workers  
12 is needed.

21 The aim of the present study was to establish an efficient way to identify workers who  
22 were diagnosed as having MDD (= workers with depression) and those who were not diagnosed  
23 as having MDD but had other psychiatric disorders that are frequently comorbid with MDD (=  
24 workers with comorbid disorders). We identified workers with depression using  
25 Mini-International Neuropsychiatric Interview (M.I.N.I.) and investigated an optimal pair of  
26 cutoff scores using a combination of Beck Depression Inventory (BDI) and a two-question  
27 case-finding instrument (TQI) for depression screening. Afterwards, we examined the  
28 specificity and sensitivity of the screening procedure for identification of both workers with  
29 depression and those with comorbid disorders. The current study is a continuation of the  
30 preliminary research conducted in 2003.[19] In addition to the larger sample size used in the  
31 current study, we evaluated the receiver operating characteristic (ROC) curves and Youden  
32 Indices in order to calculate the optimal cutoff point for depression in the workplace.  
33  
34  
35  
36  
37  
38  
39  
40  
41  
42  
43  
44  
45  
46  
47  
48  
49  
50  
51  
52  
53  
54  
55  
56  
57  
58  
59  
60

## MATERIALS AND METHODS

### Participants

We selected two groups of participants. Group 1 was established in order to investigate the optimal pair of cutoff scores of BDI and TQI for screening of depression. Participants in Group 1 answered both BDI and TQI and their diagnosis was confirmed using the M.I.N.I.[20] The M.I.N.I. Japanese version was used as a diagnostic standard for identifying cases. Recruitment occurred between January 2001 and February 2004, and it included 90 workers in a company who agreed to participate. One (1.1%) participant did not complete the questionnaires; 89 (98.8%) took part in the study. The mean age of them was 38.4 (SD, 6.6) and 81 (91.0%) were male.

Group 2 was established in order to investigate the sampling bias in the distribution of depression severity among Group 1, which was a relatively small sample size. In Group 2, a large number of subjects were necessary; therefore, only BDI and TQI were performed and the M.I.N.I. assessment was omitted. Recruitment occurred between July 2000 and February 2004 and 1591 workers from three companies agreed to participate. All the employees in the companies were invited to participate in the study. Ninety-one (5.7%) participants did not complete the questionnaire; 1500 (94.2%) took part in the study. The mean age of them was 40.9 (SD, 7.2) and 1408 (93.9%) were male. Demographic data of participants in each group are shown in Supplementary table 1.

### Measurements

Beck Depression Inventory (BDI)

1  
2  
3  
4  
5 The BDI, developed by Beck et al., is one of the most widely used self-rating  
6  
7 questionnaires for measuring the severity of depression.[21] The BDI-I is a 21-item scale (range  
8  
9 0-60). We used the Japanese version of BDI-I, which has been validated and is widely used in  
10  
11 Japan.[22]  
12

### 13 14 15 Two-question case-finding instrument (TQI) 16

17  
18  
19 A two-question depression-screening tool developed by Whooley et al. was extracted  
20  
21 from the Primary Care Evaluation of Mental Disorders (PRIME-MD) questionnaire.[23, 24] It  
22  
23 includes two questions about depressed mood and anhedonia: (1) “During the past month, have  
24  
25 you often been bothered by feeling down, depressed, or hopeless?” and (2) “During the past  
26  
27 month, have you often been bothered by little interest or pleasure in doing things?” The TQI  
28  
29 operates in the range of many other validated depression-screening tools, and it eases the burden  
30  
31 of administration by being succinct. For the two-question instrument, a “yes” answer to either of  
32  
33 the two questions was considered to indicate a positive result.  
34

35  
36 After obtaining consent from the author of the original work, the original TQI was  
37  
38 carefully translated into Japanese. The semantic fidelity of the Japanese version of TQI was  
39  
40 ascertained by means of back translation, whereby the first Japanese version was translated back  
41  
42 into English by an independent researcher blind to the original English version, and any  
43  
44 discrepancies between the original and the re-translations were corrected until the two were  
45  
46 semantically equivalent.  
47

### 48 49 50 Criterion Standard 51

52  
53  
54 The M.I.N.I. is a short structured diagnostic interview, developed jointly by  
55  
56 psychiatrists and clinicians in the United States and Europe, for DSM-IV and International  
57  
58  
59  
60

1  
2  
3  
4  
5 Classification of Diseases, Tenth Edition (ICD-10) psychiatric disorders.[20] With an  
6  
7 administration time of approximately 15 minutes, M.I.N.I. was designed to meet the need for a  
8  
9 short but accurate structured psychiatric interview for multicenter clinical trials and  
10  
11 epidemiology studies and to be used as a first step in outcome tracking in non-research clinical  
12  
13 settings. Trained psychiatrists and clinical psychologists performed the Japanese version of  
14  
15 M.I.N.I. structured interview, and the results were used to validate the optimal pair of cutoff  
16  
17 scores of BDI and TQI.  
18  
19

## 20 21 **Study Design and Procedure** 22 23

24  
25 In Group 1, participants were assessed by BDI and TQI and then they were  
26  
27 additionally diagnosed using the M.I.N.I. In Group 2, only BDI and TQI assessments were  
28  
29 performed. Subsequently, we investigated the frequency distributions of BDI and TQI in two  
30  
31 groups and compared them to confirm that there were no significant differences between the  
32  
33 two experimental groups. After confirming that Group 1 was not a biased sample, we explored  
34  
35 the optimal pair of cutoff scores of BDI and TQI for identifying workers with depression.  
36  
37

38 The frequency distributions of BDI and TQI were compared using Mann-Whitney U  
39  
40 test ( $p < 0.05$ ) to examine whether there were statistical significant differences between the two  
41  
42 groups. The sensitivity (Se), specificity (Sp), and positive predictive value (PPV) were  
43  
44 calculated for all possible cutoff scores for BDI, TQI, and all possible pairs of cutoff scores of  
45  
46 BDI and TQI to identify workers with depression in Group 1. Sensitivity refers to the proportion  
47  
48 of correctly identified cases and specificity to the proportion of correctly identified non-cases.  
49  
50 PPV is the probability that depressed workers identified using the optimal cutoff score are cases  
51  
52 according to the M.I.N.I.  
53

54 To determine the optimal cutoff point, the receiver operating characteristic (ROC)  
55  
56 curve was created for all possible cutoff scores of BDI, TQI, and all possible pairs of cutoff  
57  
58  
59  
60

1  
2  
3  
4  
5 scores of BDI and TQI. The Youden Indices were calculated, concurrently. The ROC curve is a  
6  
7 popular graphical method of displaying the discriminatory accuracy of a diagnostic test for  
8  
9 distinguishing between two populations. The ROC curve is a plot of Se and 1 - Sp for all  
10  
11 possible cutoff scores of the test. To evaluate the discriminatory ability of a diagnostic test, it is  
12  
13 common to summarize the information of the ROC curve into a single global value or  
14  
15 index.[25] The Youden Index is the easiest to apply and frequently used in practice. This index  
16  
17 can be defined as  $\{Se + Sp - 1\}$  and provides a criterion for the “optimal” threshold value; the  
18  
19 threshold value for which  $Se + Sp - 1$  is maximized.[26]  
20

21  
22 Furthermore, we applied the screening thresholds to identify workers with comorbid  
23  
24 disorders in additions to those with depression. The Se, Sp, and PPV were calculated for all  
25  
26 possible cutoff scores for BDI, TQI, and all possible pairs of cutoff scores of BDI and TQI to  
27  
28 identify both workers with depression and those with comorbid disorders. Subsequently, the  
29  
30 ROC curve was created and the Youden Indices were calculated.  
31  
32  
33  
34  
35  
36  
37  
38  
39  
40  
41  
42  
43  
44  
45  
46  
47  
48  
49  
50  
51  
52  
53  
54  
55  
56  
57  
58  
59  
60

## RESULTS

The frequency distributions of BDI and TQI in each group are presented in Figure 1 and Table 1, respectively. Mann-Whitney U test revealed that there was no significant difference in the frequency distribution of BDI between the two groups. However, significant difference was found in the frequency distributions of TQI between two groups ( $p = .003$ ). The diagnoses of the participants in Group 1 based on M.I.N.I. are listed in Table 2.

Table 1  
Frequency distributions of two-question case-finding instrument

| Number of 'yes' answers | Group 1 |      | Group 2 |      |
|-------------------------|---------|------|---------|------|
|                         | N       | %    | N       | %    |
| 0                       | 51      | 57.3 | 1097    | 73.1 |
| 1                       | 25      | 28.1 | 229     | 15.3 |
| 2                       | 13      | 14.6 | 174     | 11.6 |

Table 2  
The diagnoses of participants in Group 1 according to Mini-International Neuropsychiatric Interview

| Diagnosis                                                             | N  | %    |
|-----------------------------------------------------------------------|----|------|
| No diagnosis                                                          | 60 | 67.4 |
| Substance use disorder                                                | 16 | 17.9 |
| Anxiety disorder                                                      | 6  | 6.7  |
| Major depressive disorder                                             | 3  | 3.3  |
| Bipolar disorder                                                      | 1  | 1.1  |
| Dysthymia                                                             | 1  | 1.1  |
| Bipolar disorder + Substance use disorder                             | 1  | 1.1  |
| Major depressive disorder + Substance use disorder + Anxiety disorder | 1  | 1.1  |

The sensitivity, specificity, and PPV for all possible cutoff scores of BDI, TQI, and all possible pairs of cutoff scores of BDI and TQI to identify workers with depression are listed in Table 3. The ROC curves are showed in Supplementary figure 1 and the Youden Indices are listed in Table 3. The maximum value of the Youden Index was derived from neither BDI nor TQI alone but the combination of the BDI and TQI: 0.776 at the point of BDI score  $\geq 10$  and TQI score = 2. The pair of scores of BDI  $\geq 10$  and TQI = 2 was considered to be optimal to identify workers with depression; both those whose BDI score was  $\geq 10$  and those whose TQI score was = 2 were defined as “cases”.

Table 3

The sensitivity, specificity, positive predictive value (PPV), and Youden Indices for all possible cutoff scores for Beck Depression Inventory (BDI), two-question case-finding instrument (TQI), and all possible pairs of cutoff scores of BDI and TQI to identify workers who were diagnosed with major depressive disorder.

|                  | Sensitivity | Specificity | PPV  | Youden Index |
|------------------|-------------|-------------|------|--------------|
| BDI cutoff score |             |             |      |              |
| 4                | 100         | 56.4        | 9.7  | 0.564        |
| 5                | 100         | 60.0        | 10.5 | 0.600        |
| 6                | 75.0        | 67.0        | 9.6  | 0.420        |
| 7                | 75.0        | 74.1        | 12.0 | 0.491        |
| 8                | 75.0        | 80.0        | 15.0 | 0.550        |
| 9                | 75.0        | 82.3        | 16.6 | 0.573        |
| 10               | 75.0        | 84.7        | 18.7 | 0.597        |
| 11               | 50.0        | 87.0        | 15.3 | 0.370        |
| 12               | 50.0        | 90.5        | 20.0 | 0.405        |
| 13               | 50.0        | 91.7        | 22.2 | 0.417        |
| 14               | 50.0        | 92.9        | 25.0 | 0.429        |
| 15               | 50.0        | 92.9        | 25.0 | 0.429        |



|    |                        |      |      |      |       |       |
|----|------------------------|------|------|------|-------|-------|
| 1  |                        |      |      |      |       |       |
| 2  |                        |      |      |      |       |       |
| 3  |                        |      |      |      |       |       |
| 4  |                        |      |      |      |       |       |
| 5  |                        |      |      |      |       |       |
| 6  | 16                     | 25.0 | 94.1 | 16.6 | 0.191 |       |
| 7  | 17                     | 25.0 | 95.2 | 20.0 | 0.202 |       |
| 8  |                        |      |      |      |       |       |
| 9  | 18                     | 0    | 98.8 | 25.0 | 0.214 |       |
| 10 | TQI cutoff score       |      |      |      |       |       |
| 11 |                        |      |      |      |       |       |
| 12 | 1                      | 100  | 60.0 | 10.5 | 0.600 |       |
| 13 | 2                      | 75.0 | 88.2 | 23.0 | 0.632 |       |
| 14 | Pairs of cutoff scores |      |      |      |       |       |
| 15 |                        |      |      |      |       |       |
| 16 |                        |      |      |      |       |       |
| 17 | BDI                    | TQI  |      |      |       |       |
| 18 |                        |      |      |      |       |       |
| 19 | 4                      | 2    | 100  | 56.4 | 9.7   | 0.564 |
| 20 | 5                      | 2    | 100  | 60.0 | 10.5  | 0.600 |
| 21 | 6                      | 2    | 100  | 65.8 | 12.1  | 0.658 |
| 22 | 7                      | 2    | 100  | 72.9 | 14.8  | 0.729 |
| 23 | 8                      | 2    | 100  | 75.2 | 16.0  | 0.752 |
| 24 | 9                      | 2    | 100  | 76.4 | 16.6  | 0.764 |
| 25 | 10                     | 2    | 100  | 77.6 | 17.3  | 0.776 |
| 26 | 11                     | 2    | 75.0 | 80.0 | 15.0  | 0.550 |
| 27 | 12                     | 2    | 75.0 | 82.3 | 16.6  | 0.573 |
| 28 | 13                     | 2    | 75.0 | 82.3 | 16.6  | 0.573 |
| 29 | 14                     | 2    | 75.0 | 83.5 | 17.6  | 0.585 |
| 30 | 15                     | 2    | 75.0 | 83.5 | 17.6  | 0.585 |
| 31 | 16                     | 2    | 75.0 | 84.7 | 18.7  | 0.597 |
| 32 | 17                     | 2    | 75.0 | 85.8 | 20.0  | 0.608 |
| 33 | 18                     | 2    | 75.0 | 87.0 | 21.4  | 0.620 |
| 34 | 4                      | 1    | 100  | 47.0 | 8.1   | 0.470 |
| 35 | 5                      | 1    | 100  | 49.4 | 8.5   | 0.491 |
| 36 | 6                      | 1    | 100  | 52.9 | 9.0   | 0.529 |
| 37 | 7                      | 1    | 100  | 55.2 | 9.5   | 0.552 |
| 38 | 8                      | 1    | 100  | 56.4 | 9.7   | 0.564 |
| 39 | 9                      | 1    | 100  | 56.4 | 9.7   | 0.564 |
| 40 | 10                     | 1    | 100  | 56.4 | 10.0  | 0.576 |
| 41 | 11                     | 1    | 100  | 57.6 | 10.0  | 0.576 |
| 42 | 12                     | 1    | 100  | 57.6 | 10.5  | 0.600 |
| 43 |                        |      |      |      |       |       |
| 44 |                        |      |      |      |       |       |
| 45 |                        |      |      |      |       |       |
| 46 |                        |      |      |      |       |       |
| 47 |                        |      |      |      |       |       |
| 48 |                        |      |      |      |       |       |
| 49 |                        |      |      |      |       |       |
| 50 |                        |      |      |      |       |       |
| 51 |                        |      |      |      |       |       |
| 52 |                        |      |      |      |       |       |
| 53 |                        |      |      |      |       |       |
| 54 |                        |      |      |      |       |       |
| 55 |                        |      |      |      |       |       |
| 56 |                        |      |      |      |       |       |
| 57 |                        |      |      |      |       |       |
| 58 |                        |      |      |      |       |       |
| 59 |                        |      |      |      |       |       |
| 60 |                        |      |      |      |       |       |

|    |   |     |      |      |       |
|----|---|-----|------|------|-------|
| 13 | 1 | 100 | 60.0 | 10.5 | 0.600 |
| 14 | 1 | 100 | 60.0 | 10.5 | 0.600 |
| 15 | 1 | 100 | 60.0 | 10.5 | 0.600 |
| 16 | 1 | 100 | 60.0 | 10.5 | 0.600 |
| 17 | 1 | 100 | 60.0 | 10.5 | 0.600 |
| 18 | 1 | 100 | 60.0 | 10.5 | 0.600 |

The sensitivity, specificity, and PPV at all possible cutoff scores for BDI, TQI, and all possible pairs of cutoff scores of BDI and TQI to identify both workers with depression and those with comorbid disorders are listed in Table 4. The ROC curves are showed in Supplementary figure 2 and the Youden Indices are listed in Table 4. The maximum value of the Youden Index was derived from neither BDI nor TQI alone but from the combination of BDI and TQI: 0.316 at the point of BDI score  $\geq 9$  and TQI = 2. The combination of BDI  $\geq 10$  and TQI = 2, which was considered to be optimal to identify workers with depression, showed the Youden Index of 0.281 to identify both workers with depression and those with comorbid disorders. There was little difference in the Youden Index between the two points, and the primary purpose of this screening was to identify workers with depression; therefore, the pair of scores of BDI  $\geq 10$  and TQI = 2 would be adequate to identify both workers with depression and those with comorbid disorders.

Table 4

The sensitivity, specificity, positive predictive value (PPV), and Youden Indices for all possible cutoff scores for Beck Depression Inventory (BDI), two-question case-finding instrument (TQI), and all possible pairs of cutoff scores BDI and TQI to identify both workers who were diagnosed as having major depressive disorder (MDD) and those who were not diagnosed as having MDD but had other psychiatric disorders frequently comorbid with MDD.

|                        |     | Sensitivity | Specificity | PPV  | Youden Index |
|------------------------|-----|-------------|-------------|------|--------------|
| BDI cutoff score       |     |             |             |      |              |
| 4                      |     | 62.0        | 61.6        | 43.9 | 0.237        |
| 5                      |     | 58.6        | 65.0        | 44.7 | 0.236        |
| 6                      |     | 51.7        | 73.3        | 48.3 | 0.250        |
| 7                      |     | 44.8        | 80.0        | 52.0 | 0.248        |
| 8                      |     | 41.3        | 86.6        | 60.0 | 0.280        |
| 9                      |     | 41.3        | 90.0        | 66.6 | 0.313        |
| 10                     |     | 37.9        | 91.6        | 68.7 | 0.295        |
| 11                     |     | 31.0        | 93.3        | 69.2 | 0.243        |
| 12                     |     | 27.5        | 96.6        | 80.0 | 0.242        |
| 13                     |     | 27.5        | 98.3        | 88.8 | 0.259        |
| 14                     |     | 24.1        | 98.3        | 87.5 | 0.224        |
| 15                     |     | 24.1        | 98.3        | 87.5 | 0.224        |
| 16                     |     | 17.2        | 98.3        | 83.3 | 0.155        |
| 17                     |     | 13.7        | 98.3        | 80.0 | 0.121        |
| 18                     |     | 10.3        | 98.3        | 75.0 | 0.086        |
| TQI cutoff score       |     |             |             |      |              |
| 1                      |     | 48.2        | 60.0        | 36.8 | 0.082        |
| 2                      |     | 20.2        | 88.3        | 46.1 | 0.090        |
| Pairs of cutoff scores |     |             |             |      |              |
|                        | BDI | TQI         |             |      |              |
| 4                      | 2   | 62.0        | 61.6        | 43.9 | 0.237        |
| 5                      | 2   | 58.6        | 65.0        | 44.7 | 0.236        |
| 6                      | 2   | 55.1        | 71.6        | 48.4 | 0.268        |
| 7                      | 2   | 48.2        | 78.3        | 51.8 | 0.266        |
| 8                      | 2   | 48.2        | 81.6        | 56.0 | 0.299        |
| 9                      | 2   | 48.2        | 83.3        | 58.3 | 0.316        |
| 10                     | 2   | 44.8        | 83.3        | 56.5 | 0.281        |
| 11                     | 2   | 37.9        | 85.0        | 55.0 | 0.229        |
| 12                     | 2   | 34.4        | 86.6        | 55.5 | 0.211        |
| 13                     | 2   | 34.4        | 86.6        | 55.5 | 0.211        |

|    |       |   |      |      |      |       |
|----|-------|---|------|------|------|-------|
| 1  |       |   |      |      |      |       |
| 2  |       |   |      |      |      |       |
| 3  |       |   |      |      |      |       |
| 4  |       |   |      |      |      |       |
| 5  |       |   |      |      |      |       |
| 6  | 14    | 2 | 31.0 | 86.6 | 52.9 | 0.177 |
| 7  | 15    | 2 | 31.0 | 86.6 | 52.9 | 0.177 |
| 8  |       |   |      |      |      |       |
| 9  | 16    | 2 | 27.5 | 86.6 | 50.0 | 0.142 |
| 10 | 17    | 2 | 24.1 | 86.6 | 46.6 | 0.108 |
| 11 |       |   |      |      |      |       |
| 12 | 18    | 2 | 20.6 | 86.6 | 42.8 | 0.073 |
| 13 |       |   |      |      |      |       |
| 14 | 4     | 1 | 62.0 | 48.3 | 36.7 | 0.104 |
| 15 | 5     | 1 | 58.6 | 50.0 | 36.1 | 0.086 |
| 16 |       |   |      |      |      |       |
| 17 | 6     | 1 | 58.6 | 55.0 | 38.6 | 0.136 |
| 18 | 7     | 1 | 55.1 | 56.6 | 38.0 | 0.118 |
| 19 |       |   |      |      |      |       |
| 20 | 8     | 1 | 55.1 | 58.3 | 39.0 | 0.135 |
| 21 |       |   |      |      |      |       |
| 22 | 9     | 1 | 55.1 | 58.3 | 39.0 | 0.135 |
| 23 |       |   |      |      |      |       |
| 24 | 10    | 1 | 51.7 | 58.3 | 37.5 | 0.100 |
| 25 | 11    | 1 | 48.2 | 58.3 | 37.5 | 0.100 |
| 26 |       |   |      |      |      |       |
| 27 | 12    | 1 | 48.2 | 60.0 | 36.8 | 0.082 |
| 28 | 13    | 1 | 48.2 | 60.0 | 36.8 | 0.082 |
| 29 |       |   |      |      |      |       |
| 30 | 14    | 1 | 48.2 | 60.0 | 36.8 | 0.082 |
| 31 | 15    | 1 | 48.2 | 60.0 | 36.8 | 0.082 |
| 32 |       |   |      |      |      |       |
| 33 | 16    | 1 | 48.2 | 60.0 | 36.8 | 0.082 |
| 34 | 17    | 1 | 48.2 | 60.0 | 36.8 | 0.082 |
| 35 |       |   |      |      |      |       |
| 36 | 18    | 1 | 48.2 | 60.0 | 36.8 | 0.082 |
| 37 | <hr/> |   |      |      |      |       |
| 38 |       |   |      |      |      |       |
| 39 |       |   |      |      |      |       |
| 40 |       |   |      |      |      |       |
| 41 |       |   |      |      |      |       |
| 42 |       |   |      |      |      |       |
| 43 |       |   |      |      |      |       |
| 44 |       |   |      |      |      |       |
| 45 |       |   |      |      |      |       |
| 46 |       |   |      |      |      |       |
| 47 |       |   |      |      |      |       |
| 48 |       |   |      |      |      |       |
| 49 |       |   |      |      |      |       |
| 50 |       |   |      |      |      |       |
| 51 |       |   |      |      |      |       |
| 52 |       |   |      |      |      |       |
| 53 |       |   |      |      |      |       |
| 54 |       |   |      |      |      |       |
| 55 |       |   |      |      |      |       |
| 56 |       |   |      |      |      |       |
| 57 |       |   |      |      |      |       |
| 58 |       |   |      |      |      |       |
| 59 |       |   |      |      |      |       |
| 60 |       |   |      |      |      |       |

## DISCUSSION

The present study revealed that combined implementation of BDI and TQI is useful to screen for depressed workers and the optimal pair of cutoff scores is a BDI score  $\geq 10$  and a TQI score  $\geq 2$ . Furthermore, all diagnosed workers in our sample were considered to be depressed because substance use disorder and anxiety disorder are frequently comorbid with depression and patients with bipolar disorder and dysthymia often experience depression. Our results also suggest that it is also possible to identify workers who are likely to be depressed using two instruments with the cutoff scores; therefore, the combination use is considered to be effective as a screening tool in the workplace.

Several studies have investigated the cutoff point of BDI in general populations and failed to get consistent results.[13, 21] Furthermore, there has been no study that investigated optimal cutoff scores of BDI and TQI in the workplace. Beck suggested that a total score of less than 10 is not associated with depressive disorders; scores between 10 and 18 indicate mild to moderate depression; scores between 19 and 29 correlate with moderate and severe depression; and scores of more than 30 indicate severe depression. Indeed, a BDI score  $\geq 10$  has been selected as a cutoff in many studies.[27-29] However, Lasa et al. reported that a BDI score  $\geq 13$  had high sensitivity and specificity for detecting depression and was an optimal cutoff in a general population.[29] We speculate that the difference between the cutoff detected in our study and that reported in the previous study is related to differences between the two study populations. Specifically, almost half of participants in the Lasa study were females (50.16%) and a high BDI score ( $\geq 13$ ) was more common among females than males. However, as the majority of participants in the current study were males, difference in terms of gender composition might have contributed to the low cutoff score of BDI in this study as compared to that in the Lasa study. In our study, better sensitivity and specificity was achieved by an additional use of TQI. TQI is less time-consuming; therefore, the combination use of BDI and

1  
2  
3  
4  
5 TQI as a screening tool in the workplace is considered to be reasonable, especially for  
6  
7 companies with large numbers of employees.  
8

9  
10 Several important limitations of our study design should be considered when  
11 interpreting the results. In particular, the facts that our sample size was relatively small and the  
12 vast majority of the participants were men may affect the precision of calculated estimates  
13 based on the data presented in our study. We conducted additional analyses in the male only  
14 sample and presented the results in the supplementary materials (Supplementary tables 2, 3, 4  
15 and 5; Supplementary figures 3, 4 and 5). Other Methodological problems are as follows: the  
16 Japanese version of TQI has not been validated, and the MINI interview was not performed in  
17 the larger group. Validation of the Japanese version of TQI would have contributed to improve  
18 accuracy of the present results. Performing the diagnostic interview even in shorter versions of  
19 MINI in the larger group would have contributed to increase the number of subjects for analysis.  
20 Moreover, a statistically significant difference was found in the frequency distribution of TQI  
21 between Group 1 and 2, although there was no significant difference in BDI between the two  
22 groups. The score range of BDI is wide (0-60), and it has been proved that BDI can be used as a  
23 measure of depression symptom severity. On the other hand, the score range of TQI is 0 – 2, and  
24 TQI is considered to be a tool that can help to make the diagnosis of depression, but not to  
25 evaluate symptom severity. Therefore, BDI is thought to be suitable to compare the distributions  
26 of severity of depression, whereas the difference in the frequency distributions of TQI would be  
27 negligible. Finally, no data of the socio-economical status was collected in this study, therefore,  
28 effect of socio-economical factors were not included in the analyses.  
29  
30  
31  
32  
33  
34  
35  
36  
37  
38  
39  
40  
41  
42  
43  
44  
45  
46  
47

48 We conclude that combined application of BDI and TQI is an efficient way to identify  
49 not only workers who are depressed but also those who are likely to be depressed in the  
50 workplace. Although further investigations using larger samples are needed, the BDI and TQI  
51 combination is a useful screening tool, especially for big companies that have many employees.  
52  
53  
54  
55  
56  
57  
58  
59  
60

## Funding

Funding for this study was provided by research grants from the Ministry of Education, Culture, Sports, Science and Technology of Japan and the Ministry of Health, Labor and Welfare of Japan.

## Competing interests

None

## Ethic approval

This study was approved under the guidelines for epidemiological studies by the Nagoya University Graduate School of Medicine and Nagoya University Hospital Ethics Review Committee and was conducted in accordance with the Helsinki Declaration. Written informed consent was obtained from each subject before the start of the study.

## Contributorship Statement

YA, BA, KY, NO substantial contributed to conception and design, acquisition of data, or analysis and interpretation of data. YA, BA, RN, TS, KY, YO and NO drafted the article or revising it critically for important intellectual content. YA, BA, RN, TS, KY, YO and NO provided final approval of the version to be published.

**REFERENCES**

- 1 Greenberg PE, Kessler RC, Birnbaum HG, et al. The economic burden of depression in the United States: how did it change between 1990 and 2000? *J Clin Psychiatry* 2003;**64**:1465-75.
- 2 Kessler RC, Berglund P, Demler O, et al. The epidemiology of major depressive disorder: results from the National Comorbidity Survey Replication (NCS-R). *JAMA* 2003;**289**:3095-105.
- 3 Sobocki P, Jonsson B, Angst J, et al. Cost of depression in Europe. *J Ment Health Policy Econ* 2006;**9**:87-98.
- 4 Kawakami N, Takeshima T, Ono Y, et al. Twelve-month prevalence, severity, and treatment of common mental disorders in communities in Japan: preliminary finding from the World Mental Health Japan Survey 2002-2003. *Psychiatry Clin Neurosci* 2005;**59**:441-52.
- 5 Tokuyama M, Nakao K, Seto M, et al. Predictors of first-onset major depressive episodes among white-collar workers. *Psychiatry Clin Neurosci* 2003;**57**:523-31.
- 6 Ministry of Health Labour and Welfare. The annual societal cost of suicide and depression. 2010; <http://www.mhlw.go.jp/stf/houdou/2r9852000000qvsy.html>.
- 7 World Health Organization. Information on Mental Health Disorders Management: Depression. 2006; [http://www.who.int/mental\\_health/management/depression/definition/en..](http://www.who.int/mental_health/management/depression/definition/en..)
- 8 Mathers CD, Loncar D. Projections of global mortality and burden of disease from 2002 to 2030. *PLoS Med* 2006;**3**:e442.
- 9 Patten SB, Wang JL, Williams JV, et al. Descriptive epidemiology of major depression in Canada. *Can J Psychiatry* 2006;**51**:84-90.
- 10 Kessler RC, Barber C, Birnbaum HG, et al. Depression in the workplace: effects on short-term disability. *Health Aff (Millwood)* 1999;**18**:163-71.
- 11 Alonso J, Angermeyer MC, Bernert S, et al. Disability and quality of life impact of mental



1  
2  
3  
4  
5 disorders in Europe: results from the European Study of the Epidemiology of Mental Disorders  
6 (ESEMED) project. *Acta Psychiatr Scand*. 2004;**109**(Suppl 420):38-46.

7  
8  
9 12 Wang PS, Lane M, Olfson M, et al. Twelve-month use of mental health services in the  
10 United States: results from the National Comorbidity Survey Replication. *Arch Gen Psychiatry*  
11 2005;**62**:629-40.

12  
13  
14 13 Young AS, Klap R, Sherbourne CD, et al. The quality of care for depressive and anxiety  
15 disorders in the United States. *Arch Gen Psychiatry* 2001;**58**:55-61.

16  
17  
18 14 Shapiro RW, Keller MB. Initial 6-month follow-up of patients with major depressive disorder.  
19 A preliminary report from the NIMH collaborative study of the psychobiology of depression. *J*  
20 *Affect Disord* 1981;**3**:205-20.

21  
22  
23 15 Ionescu R, Popescu C, Jipescu I. Predictors of outcome in depression. *Rom J Neurol*  
24 *Psychiatry* 1994;**32**:153-73.

25  
26  
27 16 Hirschfeld RM, Russell JM, Delgado PL, et al. Predictors of response to acute treatment of  
28 chronic and double depression with sertraline or imipramine. *J Clin Psychiatry* 1998;**59**:669-75.

29  
30  
31 17 de Diego-Adelino J, Portella MJ, Puigdemont D, et al. A short duration of untreated illness  
32 (DUI) improves response outcomes in first-depressive episodes. *J Affect Disord*  
33 2010;**120**:221-5.

34  
35  
36 18 Okuda A, Suzuki T, Kishi T, et al. Duration of untreated illness and antidepressant  
37 fluvoxamine response in major depressive disorder. *Psychiatry Clin Neurosci* 2010;**64**:268-73.

38  
39  
40 19 Suzuki T, Nobata A, Kim N, et al. Evaluation of Questionnaires (Two-question case-finding  
41 instrument and Beck Depression Inventory) as a Tool for Screening and Intervention of  
42 Depression in Work Place. *Seishinigaku* 2003;**45**:699-708.

43  
44  
45 20 Sheehan DV, Lecrubier Y, Sheehan KH, et al. The Mini-International Neuropsychiatric  
46 Interview (M.I.N.I.): the development and validation of a structured diagnostic psychiatric  
47 interview for DSM-IV and ICD-10. *J Clin Psychiatry* 1998;**59**(Suppl 20):22-33.

48  
49  
50 21 Beck AT, Beamesderfer A. Assessment of depression: the depression inventory. *Mod Probl*  
51  
52  
53  
54  
55  
56  
57  
58  
59  
60

1  
2  
3  
4  
5 Pharmacopsychiatry 1974;**7**:151-69.

6  
7 22 Hazama N. Validation of the Japanese version of Beck Depression Inventory (BDI). The  
8  
9 Kyushu Neuro-psychiatry 1989;**35**:28-32.

10  
11 23 Whooley MA, Avins AL, Miranda J, et al. Case-finding instruments for depression. Two  
12  
13 questions are as good as many. J Gen Intern Med 1997;**12**:439-45.

14  
15 24 Spitzer RL, Williams JB, Kroenke K, et al. Utility of a new procedure for diagnosing mental  
16  
17 disorders in primary care. The PRIME-MD 1000 study. JAMA 1994;**272**:1749-56.

18  
19 25 Greiner M, Pfeiffer D, Smith RD. Principles and practical application of the  
20  
21 receiver-operating characteristic analysis for diagnostic tests. Prev Vet Med 2000;**45**:23-41.

22  
23 26 Youden WJ. Index for rating diagnostic tests. Cancer 1950;**3**:32-5.

24  
25 27 Ahola K, Honkonen T, Kivimaki M, et al. Contribution of burnout to the association between  
26  
27 job strain and depression: the health 2000 study. J Occup Environ Med 2006;**48**:1023-30.

28  
29 28 Aben I, Verhey F, Lousberg R, et al. Validity of the beck depression inventory, hospital  
30  
31 anxiety and depression scale, SCL-90, and hamilton depression rating scale as screening  
32  
33 instruments for depression in stroke patients. Psychosomatics 2002;**43**:386-93.

34  
35 29 Lasa L, Ayuso-Mateos JL, Vazquez-Barquero JL, et al. The use of the Beck Depression  
36  
37 Inventory to screen for depression in the general population: a preliminary analysis. J Affect  
38  
39 Disord 2000;**57**:261-5.  
40  
41  
42  
43  
44  
45  
46  
47  
48  
49  
50  
51  
52  
53  
54  
55  
56  
57  
58  
59  
60

1  
2  
3  
4  
5  
6  
7  
8  
9  
10  
11  
12  
13  
14  
15  
16  
17  
18  
19  
20  
21  
22  
23  
24  
25  
26  
27  
28  
29  
30  
31  
32  
33  
34  
35  
36  
37  
38  
39  
40  
41  
42  
43  
44  
45  
46  
47  
48  
49  
50  
51  
52  
53  
54  
55  
56  
57  
58  
59  
60

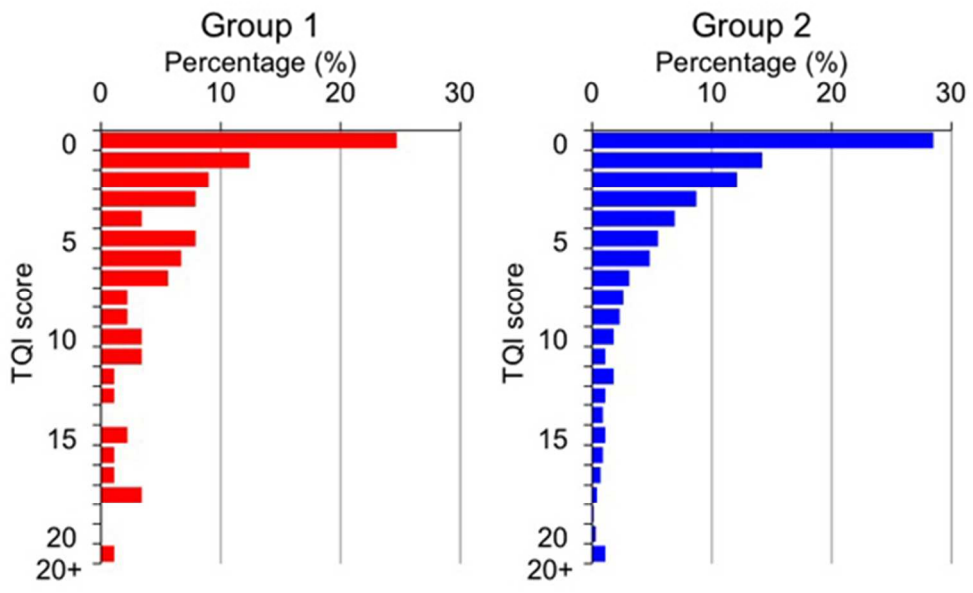

50x32mm (300 x 300 DPI)

Review only

1  
2  
3  
4  
5  
6  
7  
8  
9  
10  
11  
12  
13  
14  
15  
16  
17  
18  
19  
20  
21  
22  
23  
24  
25  
26  
27  
28  
29  
30  
31  
32  
33  
34  
35  
36  
37  
38  
39  
40  
41  
42  
43  
44  
45  
46  
47  
48  
49  
50  
51  
52  
53  
54  
55  
56  
57  
58  
59  
60

*Supplementary material*

## Combination Use of Beck Depression Inventory and Two- Question Case-Finding Instrument as a Screening Tool for Depression in the Workplace

Yasunori Adachi<sup>a</sup>, Branko Aleksic<sup>a, \*</sup>, Ryoko Nobata<sup>b</sup>, Tatsuyo Suzuki<sup>c</sup>, Keizo Yoshida<sup>d</sup>, Yuichiro Ono<sup>e</sup>, Norio Ozaki<sup>a</sup>

\*Corresponding author

<sup>a</sup>Department of Psychiatry, Graduate School of Medicine, Nagoya University, Nagoya, Japan

<sup>b</sup>Department of Psychiatry, Toyota Memorial Hospital, Toyota, Japan

<sup>c</sup>Department of Psychiatry, Seishinkai Okehazama Hospital, Toyoake, Japan

<sup>d</sup>Health Care Promotion Division, DENSO Corporation, Kariya, Japan

<sup>e</sup>Department of Public Health, Fujita Health University, Toyoake, Japan

Supplementary table 1.

Demographic data of participants

|        | Group 1<br>(N=89) |      | Group 2<br>(N=1500) |      |
|--------|-------------------|------|---------------------|------|
|        | N                 | %    | N                   | %    |
| Sex    |                   |      |                     |      |
| Male   | 81                | 91.0 | 1408                | 93.9 |
| Female | 8                 | 9.0  | 92                  | 6.1  |
| Age    |                   |      |                     |      |
| -19    | 0                 | 0    | 0                   | 0    |
| 20-29  | 7                 | 7.9  | 54                  | 3.6  |
| 30-39  | 44                | 49.4 | 655                 | 43.7 |
| 40-49  | 32                | 36.0 | 573                 | 38.2 |
| 50-59  | 6                 | 6.7  | 213                 | 14.2 |
| 60-    | 0                 | 0    | 5                   | 0.3  |

Supplementary figure 1.

Receiver Operation Characteristic curves for all possible cutoff scores of Beck Depression Inventory (BDI), two-question case-finding instrument (TQI), and all possible pairs of cutoff scores of BDI and TQI to identify workers who were diagnosed as having major depressive disorder. The points and corresponding lines in this figure are shifted to avoid overlapping by adding 0.03, 0.01, -0.01 and -0.03 to the sensitivity values of the groups of BDI + TQI = 2, BDI + TQI ≥ 1, BDI and TQI, respectively.



Supplementary figure 2.

Receiver Operation Characteristic curves for all possible cutoff scores of Beck Depression Inventory (BDI), two-question case-finding instrument (TQI), and all possible pairs of cutoff scores of BDI and TQI to identify both workers who were diagnosed as having major depressive disorder (MDD) and those who were not diagnosed as having MDD but having other psychiatric disorders frequently comorbid with MDD. The points and corresponding lines in this figure are shifted to avoid overlapping by adding 0.03, 0.01, -0.01 and -0.03 to the sensitivity values of the groups of BDI + TQI = 2, BDI + TQI  $\geq$  1, BDI and TQI, respectively.

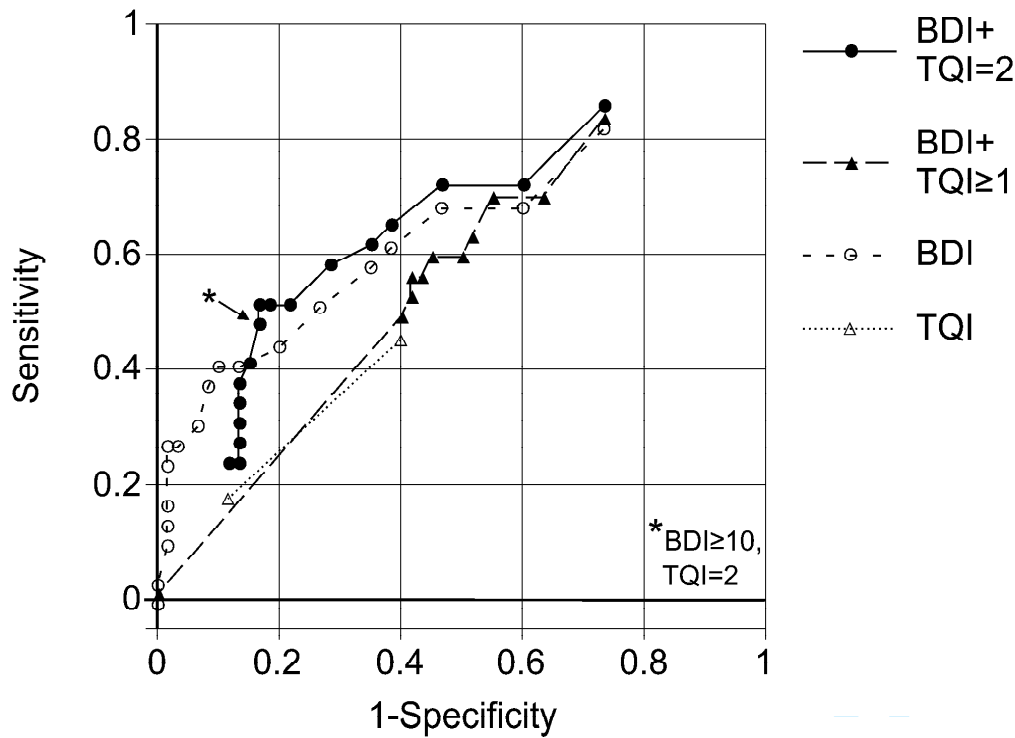

Supplementary figure 3.

Frequency distributions of Beck Depression Inventory in the male only sample

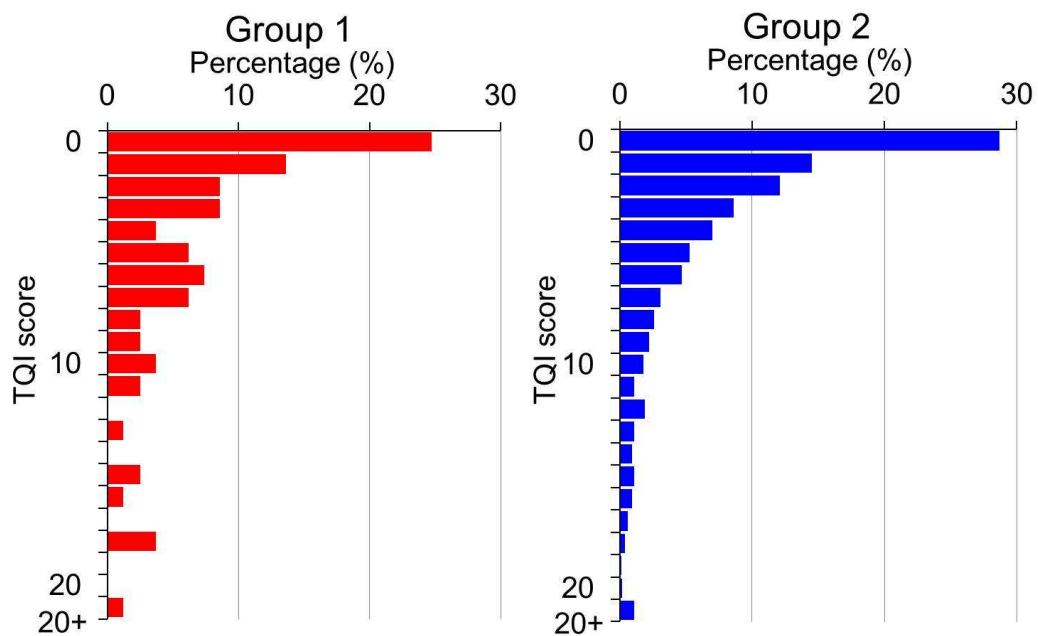

Review only



1  
2  
3  
4  
5  
6  
7  
8  
9  
10  
11  
12  
13  
14  
15  
16  
17  
18  
19  
20  
21  
22  
23  
24  
25  
26  
27  
28  
29  
30  
31  
32  
33  
34  
35  
36  
37  
38  
39  
40  
41  
42  
43  
44  
45  
46  
47  
48  
49  
50  
51  
52  
53  
54  
55  
56  
57  
58  
59  
60

Supplementary table 2  
Frequency distributions of two-question case-finding instrument in the male only sample

| Number of 'yes' answers | Group 1 |      | Group 2 |      |
|-------------------------|---------|------|---------|------|
|                         | N       | %    | N       | %    |
| 0                       | 47      | 58.0 | 1033    | 73.4 |
| 1                       | 23      | 28.4 | 213     | 15.1 |
| 2                       | 11      | 13.6 | 162     | 11.5 |

For peer review only

## Supplementary table 3

The diagnoses of male participants in Group 1 according to Mini-International Neuropsychiatric Interview

| Diagnosis                                                             | N  | %    |
|-----------------------------------------------------------------------|----|------|
| No diagnosis                                                          | 54 | 66.7 |
| Substance use disorder                                                | 16 | 19.8 |
| Anxiety disorder                                                      | 5  | 6.2  |
| Major depressive disorder                                             | 2  | 2.5  |
| Bipolar disorder                                                      | 1  | 1.2  |
| Dysthymia                                                             | 1  | 1.2  |
| Bipolar disorder + Substance use disorder                             | 1  | 1.2  |
| Major depressive disorder + Substance use disorder + Anxiety disorder | 1  | 1.2  |

## Supplementary table 4

The sensitivity, specificity, positive predictive value (PPV), and Youden Indices for all possible cutoff scores for Beck Depression Inventory (BDI), two-question case-finding instrument (TQI), and all possible pairs of cutoff scores of BDI and TQI to identify workers who were diagnosed with major depressive disorder in the male only sample.

|                               |     | Sensitivity | Specificity | PPV  | Youden Index |
|-------------------------------|-----|-------------|-------------|------|--------------|
| <b>BDI cutoff score</b>       |     |             |             |      |              |
| 4                             |     | 100         | 57.7        | 8.3  | 0.577        |
| 5                             |     | 100         | 61.5        | 9.1  | 0.615        |
| 6                             |     | 100         | 67.9        | 10.7 | 0.679        |
| 7                             |     | 100         | 75.6        | 13.6 | 0.756        |
| 8                             |     | 100         | 82.1        | 17.6 | 0.821        |
| 9                             |     | 100         | 84.6        | 20.0 | 0.846        |
| 10                            |     | 100         | 87.2        | 23.1 | 0.872        |
| 11                            |     | 66.7        | 89.7        | 20.0 | 0.564        |
| 12                            |     | 66.7        | 92.3        | 25.0 | 0.590        |
| 13                            |     | 66.7        | 92.3        | 25.0 | 0.590        |
| 14                            |     | 66.7        | 93.5        | 28.6 | 0.603        |
| 15                            |     | 66.7        | 93.5        | 28.6 | 0.603        |
| 16                            |     | 33.3        | 94.9        | 20.0 | 0.282        |
| 17                            |     | 33.3        | 96.2        | 25.0 | 0.295        |
| 18                            |     | 33.3        | 96.2        | 25.0 | 0.295        |
| <b>TQI cutoff score</b>       |     |             |             |      |              |
| 1                             |     | 100         | 60.3        | 8.8  | 0.603        |
| 2                             |     | 66.7        | 88.5        | 18.2 | 0.551        |
| <b>Pairs of cutoff scores</b> |     |             |             |      |              |
|                               | BDI | TQI         |             |      |              |
| 4                             | 2   | 100         | 57.7        | 8.3  | 0.577        |
| 5                             | 2   | 100         | 61.5        | 9.1  | 0.615        |
| 6                             | 2   | 100         | 66.7        | 10.3 | 0.667        |
| 7                             | 2   | 100         | 74.4        | 13.0 | 0.744        |
| 8                             | 2   | 100         | 76.9        | 14.3 | 0.769        |
| 9                             | 2   | 100         | 78.2        | 15.0 | 0.782        |
| 10                            | 2   | 100         | 79.5        | 15.8 | 0.795        |
| 11                            | 2   | 66.7        | 82.1        | 12.5 | 0.487        |
| 12                            | 2   | 66.7        | 83.3        | 13.3 | 0.500        |
| 13                            | 2   | 66.7        | 83.3        | 13.3 | 0.500        |
| 14                            | 2   | 66.7        | 84.6        | 14.3 | 0.513        |
| 15                            | 2   | 66.7        | 84.6        | 14.3 | 0.513        |
| 16                            | 2   | 66.7        | 85.9        | 15.4 | 0.526        |
| 17                            | 2   | 66.7        | 87.2        | 16.7 | 0.538        |
| 18                            | 2   | 66.7        | 87.2        | 16.7 | 0.538        |
| 4                             | 1   | 100         | 47.4        | 6.8  | 0.474        |
| 5                             | 1   | 100         | 50.0        | 7.1  | 0.500        |
| 6                             | 1   | 100         | 53.8        | 7.7  | 0.538        |
| 7                             | 1   | 100         | 56.4        | 8.1  | 0.564        |
| 8                             | 1   | 100         | 57.7        | 8.3  | 0.577        |
| 9                             | 1   | 100         | 57.7        | 8.3  | 0.577        |

|    |   |     |      |     |       |
|----|---|-----|------|-----|-------|
| 10 | 1 | 100 | 59.0 | 8.6 | 0.590 |
| 11 | 1 | 100 | 59.0 | 8.6 | 0.590 |
| 12 | 1 | 100 | 60.3 | 8.8 | 0.603 |
| 13 | 1 | 100 | 60.3 | 8.8 | 0.603 |
| 14 | 1 | 100 | 60.3 | 8.8 | 0.603 |
| 15 | 1 | 100 | 60.3 | 8.8 | 0.603 |
| 16 | 1 | 100 | 60.3 | 8.8 | 0.603 |
| 17 | 1 | 100 | 60.3 | 8.8 | 0.603 |
| 18 | 1 | 100 | 60.3 | 8.8 | 0.603 |

---

For peer review only

Supplementary figure 4.

Receiver Operation Characteristic curves for all possible cutoff scores of Beck Depression Inventory (BDI), two-question case-finding instrument (TQI), and all possible pairs of cutoff scores of BDI and TQI to identify workers who were diagnosed as having major depressive disorder in the male only sample. The points and corresponding lines in this figure are shifted to avoid overlapping by adding 0.03, 0.01, -0.01 and -0.03 to the sensitivity values of the groups of BDI + TQI = 2, BDI + TQI  $\geq$  1, BDI and TQI, respectively.

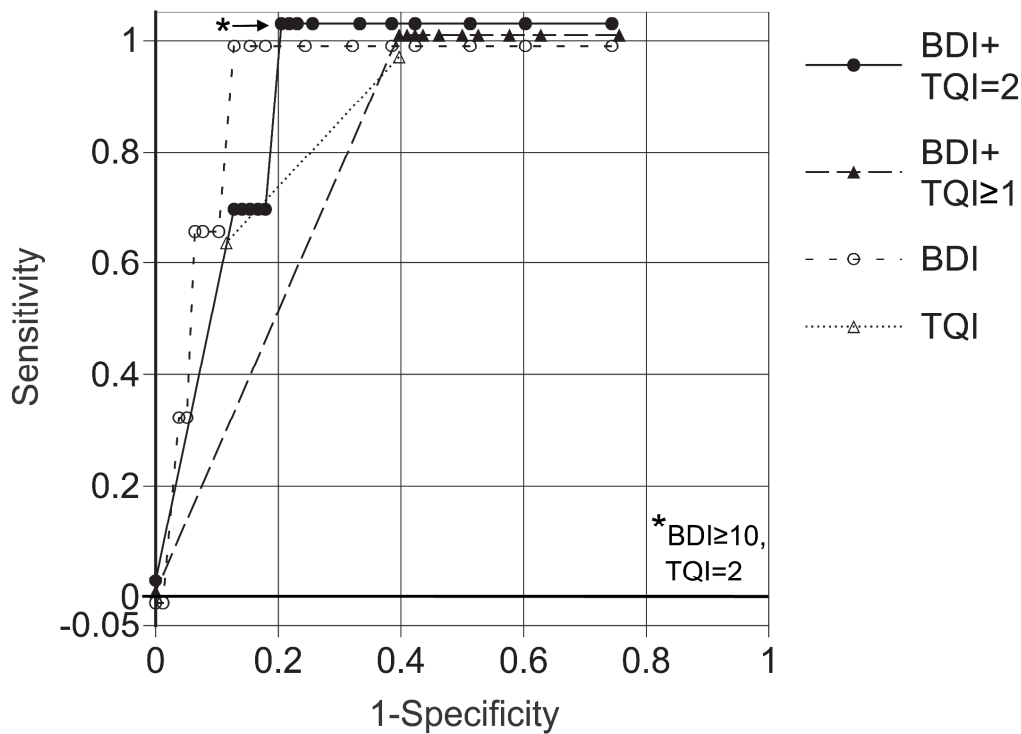

## Supplementary table 5

The sensitivity, specificity, positive predictive value (PPV), and Youden Indices for all possible cutoff scores for Beck Depression Inventory (BDI), two-question case-finding instrument (TQI), and all possible pairs of cutoff scores BDI and TQI to identify both workers who were diagnosed as having major depressive disorder (MDD) and those who were not diagnosed as having MDD but had other psychiatric disorders frequently comorbid with MDD in the male only sample.

|                        |     | Sensitivity | Specificity | PPV  | Youden Index |       |
|------------------------|-----|-------------|-------------|------|--------------|-------|
| BDI cutoff score       |     |             |             |      |              |       |
| 4                      |     | 59.3        | 63.0        | 44.4 | 0.222        |       |
| 5                      |     | 55.6        | 66.7        | 45.5 | 0.222        |       |
| 6                      |     | 51.9        | 74.1        | 50.0 | 0.259        |       |
| 7                      |     | 44.4        | 81.5        | 54.5 | 0.259        |       |
| 8                      |     | 40.7        | 88.9        | 64.7 | 0.296        |       |
| 9                      |     | 40.7        | 92.6        | 73.3 | 0.333        |       |
| 10                     |     | 37.0        | 94.4        | 76.9 | 0.315        |       |
| 11                     |     | 29.6        | 96.3        | 80.0 | 0.259        |       |
| 12                     |     | 25.9        | 98.1        | 87.5 | 0.259        |       |
| 13                     |     | 25.9        | 98.1        | 87.5 | 0.201        |       |
| 14                     |     | 22.2        | 98.1        | 85.7 | 0.201        |       |
| 15                     |     | 22.2        | 98.1        | 85.7 | 0.224        |       |
| 16                     |     | 14.8        | 98.1        | 80.0 | 0.130        |       |
| 17                     |     | 11.1        | 98.1        | 75.0 | 0.093        |       |
| 18                     |     | 11.1        | 98.1        | 75.0 | 0.093        |       |
| TQI cutoff score       |     |             |             |      |              |       |
| 1                      |     | 44.4        | 59.3        | 35.3 | 0.037        |       |
| 2                      |     | 18.5        | 88.9        | 45.5 | 0.074        |       |
| Pairs of cutoff scores |     |             |             |      |              |       |
|                        | BDI | TQI         |             |      |              |       |
| 4                      | 2   |             | 59.3        | 63.0 | 44.4         | 0.222 |
| 5                      | 2   |             | 55.6        | 66.7 | 45.5         | 0.222 |
| 6                      | 2   |             | 51.9        | 72.2 | 48.3         | 0.241 |
| 7                      | 2   |             | 44.4        | 79.6 | 52.2         | 0.241 |
| 8                      | 2   |             | 44.4        | 83.3 | 57.1         | 0.278 |
| 9                      | 2   |             | 44.4        | 85.2 | 60.0         | 0.296 |
| 10                     | 2   |             | 44.8        | 85.2 | 57.9         | 0.259 |
| 11                     | 2   |             | 33.3        | 87.0 | 56.3         | 0.204 |
| 12                     | 2   |             | 29.6        | 87.0 | 53.3         | 0.167 |
| 13                     | 2   |             | 29.6        | 87.0 | 53.3         | 0.167 |
| 14                     | 2   |             | 25.9        | 87.0 | 50.0         | 0.130 |
| 15                     | 2   |             | 25.9        | 87.0 | 50.0         | 0.130 |
| 16                     | 2   |             | 22.2        | 87.0 | 46.2         | 0.093 |
| 17                     | 2   |             | 18.5        | 87.0 | 41.7         | 0.056 |
| 18                     | 2   |             | 18.5        | 87.0 | 41.7         | 0.056 |
| 4                      | 1   |             | 59.3        | 48.1 | 36.4         | 0.074 |
| 5                      | 1   |             | 55.6        | 50.0 | 35.7         | 0.056 |
| 6                      | 1   |             | 55.6        | 55.6 | 38.5         | 0.111 |

1  
2  
3  
4  
5  
6  
7  
8  
9  
10  
11  
12  
13  
14  
15  
16  
17  
18  
19  
20  
21  
22  
23  
24  
25  
26  
27  
28  
29  
30  
31  
32  
33  
34  
35  
36  
37  
38  
39  
40  
41  
42  
43  
44  
45  
46  
47  
48  
49  
50  
51  
52  
53  
54  
55  
56  
57  
58  
59  
60

|    |   |      |      |      |       |
|----|---|------|------|------|-------|
| 7  | 1 | 51.9 | 57.4 | 37.8 | 0.093 |
| 8  | 1 | 51.9 | 59.3 | 38.9 | 0.111 |
| 9  | 1 | 51.9 | 59.3 | 38.9 | 0.111 |
| 10 | 1 | 48.1 | 59.3 | 37.1 | 0.074 |
| 11 | 1 | 48.1 | 59.3 | 37.1 | 0.074 |
| 12 | 1 | 44.4 | 59.3 | 35.2 | 0.037 |
| 13 | 1 | 44.4 | 59.3 | 35.2 | 0.037 |
| 14 | 1 | 44.4 | 59.3 | 35.2 | 0.037 |
| 15 | 1 | 44.4 | 59.3 | 35.2 | 0.037 |
| 16 | 1 | 44.4 | 59.3 | 35.2 | 0.037 |
| 17 | 1 | 44.4 | 59.3 | 35.2 | 0.037 |
| 18 | 1 | 44.4 | 59.3 | 35.2 | 0.037 |

---

For peer review only

Supplementary figure 5.

Receiver Operation Characteristic curves for all possible cutoff scores of Beck Depression Inventory (BDI), two-question case-finding instrument (TQI), and all possible pairs of cutoff scores of BDI and TQI to identify both workers who were diagnosed as having major depressive disorder (MDD) and those who were not diagnosed as having MDD but having other psychiatric disorders frequently comorbid with MDD in the male only sample. The points and corresponding lines in this figure are shifted to avoid overlapping by adding 0.03, 0.01, -0.01 and -0.03 to the sensitivity values of the groups of BDI + TQI = 2, BDI + TQI ≥ 1, BDI and TQI, respectively.

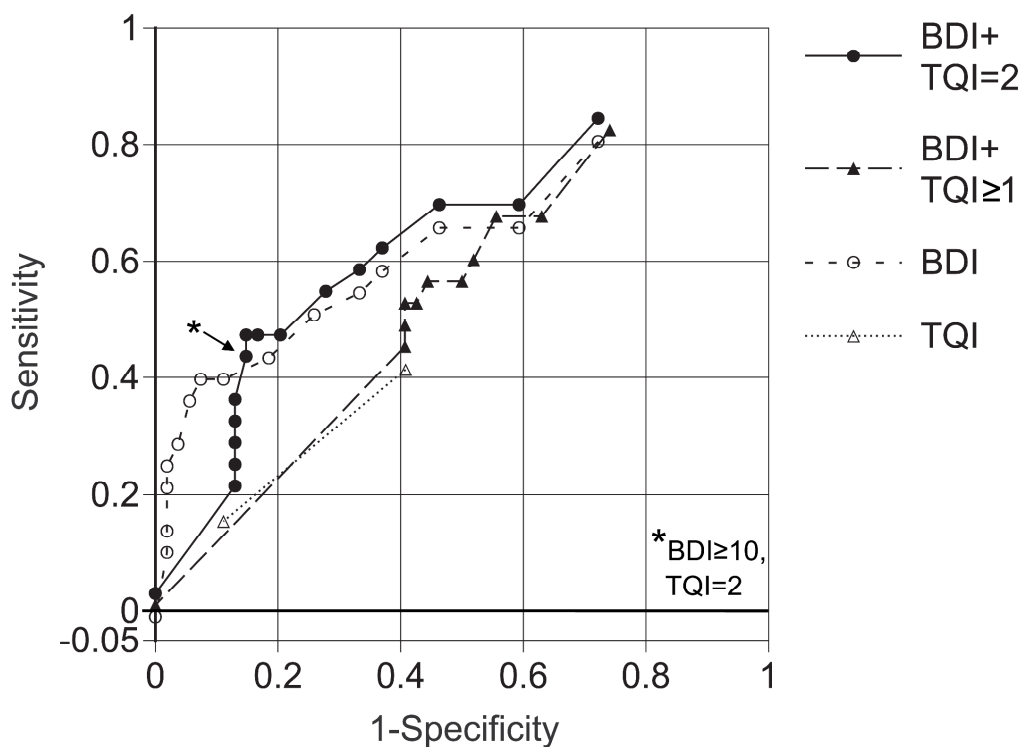

Supplement: bmjopen-2011-000596.draft_revisions.pdf [file bmjopen-2011-000596.draft_revisions.pdf]
